# Supplementary material for: Population-level health and economic impacts of introducing Vaccae vaccination in China: a modelling study
Source: HighWire-hosted journal article supplement (doi:10.1136/bmjgh-2023-012306), 2023-05-01
Supplement: bmjgh-2023-012306supp001_data_supplement.pdf [file bmjgh-2023-012306supp001_data_supplement.pdf]

## Population-level health and economic impacts of introducing *Vaccae* vaccination in China: A modeling study

### Supplementary Appendix

|                                                                                                                                                                          |           |
|--------------------------------------------------------------------------------------------------------------------------------------------------------------------------|-----------|
| <b>1. Summary in Chinese.....</b>                                                                                                                                        | <b>1</b>  |
| <b>2. Brief introduction on the efficacy trail of <i>Vaccae</i> .....</b>                                                                                                | <b>2</b>  |
| Table S1. Study design of the efficacy trial.....                                                                                                                        | 2         |
| Table S2. Vaccine efficacy of <i>Vaccae</i> as compared with placebo against pulmonary TB in adolescents and adults with evidence of tuberculosis infection.....         | 3         |
| <b>3. Model structure.....</b>                                                                                                                                           | <b>4</b>  |
| Table S3. Model parameters.....                                                                                                                                          | 4         |
| Table S4. Estimated crude birth rates in China during 1900-2050.....                                                                                                     | 8         |
| Table S5. Estimated central death rates in China during 1900-2050.....                                                                                                   | 9         |
| Figure S1. Daily number of respiratory contacts by age group in China.....                                                                                               | 14        |
| Table S6. Case detection rate (CDR) and treatment success rate (TSR) for tuberculosis in China.....                                                                      | 15        |
| <b>4. Model calibration and status quo projection.....</b>                                                                                                               | <b>16</b> |
| Table S7. Procedure for model calibration.....                                                                                                                           | 16        |
| Table S8. Demographic calibration targets.....                                                                                                                           | 17        |
| Figure S2. Model calibration and status quo projection of the population in China.....                                                                                   | 18        |
| Table S9. Epidemiological calibration targets.....                                                                                                                       | 19        |
| Figure S3. Model calibration and status quo projection of microbiologically-positive tuberculosis (TB) prevalence in China.....                                          | 20        |
| Figure S4. Model calibration and status quo projection of TB incidence in China.....                                                                                     | 21        |
| Figure S5. Model calibration and status quo projection of TB-related mortality in China.....                                                                             | 22        |
| Figure S6. Status quo projection of latent tuberculosis infection (LTBI) prevalence in China.....                                                                        | 23        |
| Figure S7. Estimated national population size and incident TB cases by age in China.....                                                                                 | 24        |
| <b>5. Vaccination strategies and epidemiological outcomes .....</b>                                                                                                      | <b>25</b> |
| Table S10. Health outcomes for routine vaccination targeting different ages, with PSI efficacy, conferring lifelong protection.....                                      | 25        |
| Table S11. Predicted incidence rate and mortality rate reduction in 2050 for government-funded national <i>Vaccae</i> vaccination in China.....                          | 26        |
| Table S12. Predicted number needed to vaccinate (NNV) per case or death averted in China during 2024-2050.....                                                           | 27        |
| <b>6. Costs and cost-effectiveness analyses .....</b>                                                                                                                    | <b>28</b> |
| Table S13. Unit cost parameters.....                                                                                                                                     | 28        |
| Table S14. Estimated Chinese life expectancy during 2024-50.....                                                                                                         | 29        |
| Table S15. Cost-effectiveness for routine vaccination targeting different ages, with PSI vaccine conferring lifelong protection, from healthcare sector perspective..... | 31        |
| Table S16. Cost-effectiveness for routine vaccination targeting different ages, with PSI vaccine conferring lifelong protection, from societal perspective.....          | 32        |
| Table S17. Predicted cost per case averted (CCA) and cost per death averted (CDA) for government-funded national <i>Vaccae</i> vaccination in China during 2024-50.....  | 33        |

|                                                                                                                                                                                                        |    |
|--------------------------------------------------------------------------------------------------------------------------------------------------------------------------------------------------------|----|
| Table S18. Cost-effectiveness for government-funded national <i>Vacciae</i> vaccination in China during 2024-50, from societal perspective.....                                                        | 34 |
| Figure S8. One-way sensitivity analyses compared with status quo, from healthcare sector perspective .....                                                                                             | 35 |
| Figure S9. Cost-effectiveness analyses of <i>Vacciae</i> vaccination in China, from societal perspective .....                                                                                         | 36 |
| Figure S10. One-way sensitivity analyses compared with status quo, from societal perspective .....                                                                                                     | 37 |
| Figure S11. Cost-effectiveness analyses of <i>Vacciae</i> vaccination in China, from healthcare sector perspective (WTP=US\$7849).....                                                                 | 38 |
| Figure S12. Cost-effectiveness analyses of <i>Vacciae</i> vaccination in China, from societal perspective (WTP=US\$7849).....                                                                          | 39 |
| Table S19. Cost-effectiveness for vaccination with <i>Vacciae</i> provided through private market during 2024-50, from healthcare sector perspective. ....                                             | 40 |
| Table S20. Cost-effectiveness for vaccination with <i>Vacciae</i> provided through private market during 2024-50, from societal perspective.....                                                       | 41 |
| Table S21. Cost-effectiveness for government-funded national <i>Vacciae</i> vaccination in China during 2024-2100, from healthcare sector perspective .....                                            | 42 |
| Table S22. Cost-effectiveness for government-funded national <i>Vacciae</i> vaccination in China during 2024-2100, from societal perspective .....                                                     | 43 |
| Table S23. Cost-effectiveness for government-funded national <i>Vacciae</i> vaccination in China during 2024-50, from healthcare sector perspective (WTP=US\$7849).....                                | 44 |
| Table S24. Cost-effectiveness for government-funded national <i>Vacciae</i> vaccination in China during 2024-50, from societal perspective (WTP=US\$7849) .....                                        | 45 |
| Table S25. Budget impact of <i>Vacciae</i> older adult routine vaccination program in China during 2024-50, with PSI vaccine conferring 10-y protection, from healthcare sector perspective .....      | 46 |
| Table S26. Budget impact of <i>Vacciae</i> older adult routine vaccination program in China during 2024-50, with PSI vaccine conferring lifelong protection, from healthcare sector perspective .      | 47 |
| Table S27. Budget impact of <i>Vacciae</i> older adult routine vaccination program in China during 2024-50, with PSI vaccine conferring 10-y protection, from societal perspective .....               | 48 |
| Table S28. Budget impact of <i>Vacciae</i> older adult routine vaccination program in China during 2024-50, with PSI vaccine conferring 20-y protection, from societal perspective .....               | 49 |
| Table S29. Budget impact of <i>Vacciae</i> older adult routine vaccination program in China during 2024-50, with PSI vaccine conferring lifelong protection, from societal perspective .....           | 50 |
| Table S30. Budget impact of <i>Vacciae</i> older adult routine vaccination program in China during 2024-50, with P&PI vaccine conferring 10-y protection, from healthcare sector perspective ...       | 51 |
| Table S31. Budget impact of <i>Vacciae</i> older adult routine vaccination program in China during 2024-50, with P&PI vaccine conferring 20-y protection, from healthcare sector perspective ...       | 52 |
| Table S32. Budget impact of <i>Vacciae</i> older adult routine vaccination program in China during 2024-50, with P&PI vaccine conferring lifelong protection, from healthcare sector perspective ..... | 53 |
| Table S33. Budget impact of <i>Vacciae</i> older adult routine vaccination program in China during 2024-50, with P&PI vaccine conferring 10-y protection, from societal perspective .....              | 54 |

|                                                                                                                                                                                               |           |
|-----------------------------------------------------------------------------------------------------------------------------------------------------------------------------------------------|-----------|
| Table S34. Budget impact of <i>Vacc</i> ae older adult routine vaccination program in China during 2024-50, with P&PI vaccine conferring 20-y protection, from societal perspective .....     | 55        |
| Table S35. Budget impact of <i>Vacc</i> ae older adult routine vaccination program in China during 2024-50, with P&PI vaccine conferring lifelong protection, from societal perspective ..... | 56        |
| Table S36. Budget impact of <i>Vacc</i> ae all-age vaccination program in China during 2024-50, from healthcare sector perspective .....                                                      | 57        |
| Table S37. Budget impact of <i>Vacc</i> ae all-age vaccination program in China during 2024-50, from societal perspective. ....                                                               | 58        |
| <b>7. Extended references .....</b>                                                                                                                                                           | <b>59</b> |

## 1. Summary in Chinese

### Population-level health and economic impacts of introducing *Vaccae* vaccination in China: A modeling study

#### 中国新型结核疫苗接种策略的健康及经济影响：一项模型研究

##### 摘要

##### 背景

在中国人口老龄化的结核病流行背景下，全球首个获批临床适应症的新型结核疫苗“微卡”在III期临床试验中显示对预防潜伏性结核感染者发生结核疾病的有效率为54.7%，为我国终结结核流行目标带来前所未有的机遇。本研究旨在评估微卡疫苗纳入政府资助的疫苗接种计划对人群健康及经济影响，为卫生决策者提供循证依据。

##### 方法

我们假设从2024年开始实施由政府资助的微卡疫苗接种计划，疫苗保护期为20年，覆盖率为90%，政府集中采购价格为30美元/剂。构建人口年龄结构仓室模型模拟不同策略情景：（1）不接种疫苗；（2）在15-74岁成人中开展大规模全人群疫苗接种；（3）对60岁老年人进行目标人群疫苗接种。评估疫苗接种计划对降低结核病发病、死亡和患者经济负担的影响，从医疗卫生体系角度进行成本分析，贴现率为3%。

##### 结果

在疫苗感染后预防（PSI）效果下，老年人目标接种策略可减少约20%的结核病负担，在2024-2050年期间将累计减少801（95%CI：582-1180）万结核病例和避免20（17-26）万例死亡，每避免一个伤残调整生命年（DALY）所需成本为4387（2218-10085）美元。目标人群接种策略需投入总预算约225（176-434）亿美元。相比之下，全人群疫苗接种对控制结核病流行的效果更大，但其成本也更高（与目标人群接种策略相比，增量成本效果比[ICER]>1倍人均GDP）。此外，假设疫苗具有感染前和感染后预防（P&PI）理想效果，虽可产生最大的流行病学效果（如2050年结核发病率降低>40%），但疫苗价格须严格控制不超过5美元/剂。

##### 结论

微卡疫苗可为中国结核病防控提供稳健且具经济效益的选择，本研究有助于推动新型结核疫苗接种策略的制定与实施决策。

## 2. Brief introduction on the efficacy trail of *Vaccae*

**Table S1.** Study design of the efficacy trial.

| <b>Item</b>                   | <b>Description</b>                                                                                                                                                                                                                                  |
|-------------------------------|-----------------------------------------------------------------------------------------------------------------------------------------------------------------------------------------------------------------------------------------------------|
| Official title                | Phase III clinical study of efficacy and safety of mycobacterium <i>Vaccae</i> to prevent tuberculosis in high risk groups of tuberculosis infection                                                                                                |
| ClinicalTrials.gov identifier | NCT01979900                                                                                                                                                                                                                                         |
| Study type                    | Interventional (clinical trial)                                                                                                                                                                                                                     |
| Actual enrollment             | 10,000 participants                                                                                                                                                                                                                                 |
| Allocation                    | Randomized                                                                                                                                                                                                                                          |
| Intervention model            | Parallel assignment<br><i>Vaccae</i> group: 6 doses of <i>Vaccae</i> administered intramuscularly in the deltoid region of the arm<br>Control group: 6 doses of placebo administered intramuscularly in the deltoid region of the arm               |
| Masking                       | Double (participant, investigator)                                                                                                                                                                                                                  |
| Primary purpose               | Prevention                                                                                                                                                                                                                                          |
| Study start date              | Oct, 2013                                                                                                                                                                                                                                           |
| Actual study completion date  | Nov 26, 2017                                                                                                                                                                                                                                        |
| Main inclusion criteria       | Aged from 15 to 65 years older, all genders.<br>Skin test of tuberculin pure protein derivative (TB-PPD) is strongly positive (the average diameter of PPD skin test induration is greater than or equal to 15mm, and/or local blisters, necrosis). |
| Primary outcome               | The whole TB incidence                                                                                                                                                                                                                              |
| Time frame                    | Terminal stage is two years after the last group of subjects enrolled                                                                                                                                                                               |

Source: Adapted from the online study record in ClinicalTrial.gov website.

<https://clinicaltrials.gov/ct2/show/NCT01979900>

**Table S2.** Vaccine efficacy of Vaccae as compared with placebo against pulmonary TB in adolescents and adults with evidence of tuberculosis infection.

| Case definition                                      | Vaccae                |                     |                                 | Placebo               |                     |                                 | Vaccine efficacy (% [95% CI]) |
|------------------------------------------------------|-----------------------|---------------------|---------------------------------|-----------------------|---------------------|---------------------------------|-------------------------------|
|                                                      | No. of incident cases | Person-yr follow-up | Rate per 100 person-yr (95% CI) | No. of incident cases | Person-yr follow-up | Rate per 100 person-yr (95% CI) |                               |
| Definite pulmonary TB disease                        | 29                    | 8846.3              | 0.328<br>(0.228, 0.472)         | 64                    | 8838.2              | 0.724<br>(0.567, 0.925)         | 54.7<br>(29.8, 70.8)          |
| Microbiological pulmonary TB disease                 | 8                     | 8858.3              | 0.090<br>(0.045, 0.181)         | 16                    | 8872.2              | 0.180<br>(0.110, 0.294)         | 49.9<br>(-17.0, 78.6)         |
| Smear or culture-positive pulmonary TB disease       | 7                     | 8858.3              | 0.079<br>(0.038, 0.166)         | 8                     | 8878.5              | 0.090<br>(0.045, 0.180)         | 12.3<br>(-141.8, 68.2)        |
| Definite Xpert MTB/Rif positive pulmonary TB disease | 1                     | 8863.2              | 0.011<br>(0.002, 0.080)         | 8                     | 8879.8              | 0.090<br>(0.045, 0.180)         | 87.5<br>(-0.1, 98.4)          |
| Clinical TB disease                                  | 21                    | 8851.7              | 0.237<br>(0.155, 0.364)         | 48                    | 8852.1              | 0.542<br>(0.409, 0.720)         | 56.2<br>(26.9, 73.8)          |

TB, tuberculosis; Xpert MTB/RIF, nucleic acid amplification test to detect *M.tb* complex and resistance to rifampicin in sputum samples.

Source: Adapted from the online Package Insert of Mycobacterium Vaccae for Injection.<sup>1</sup>

### 3. Model structure

**Table S3.** Model parameters.

| Parameter                         | Description                                                                                                                                                            | Value, prior range or fixed                                          | Reference                                                                                                               | Posterior range observed in 100 fits                               |
|-----------------------------------|------------------------------------------------------------------------------------------------------------------------------------------------------------------------|----------------------------------------------------------------------|-------------------------------------------------------------------------------------------------------------------------|--------------------------------------------------------------------|
| <b>Birth and background death</b> |                                                                                                                                                                        |                                                                      |                                                                                                                         |                                                                    |
| $B[k]$                            | Number of births in year $k$<br>UN estimates of total crude birth rate per 1000 population applied to modeled population, and tracks annual UN data from 1979 onwards. | See <a href="#">Table S4</a>                                         | UN Population Estimates (2022) <sup>2</sup>                                                                             | NA                                                                 |
| $\mu[j]$                          | Background (all-cause) death risk at age $j$                                                                                                                           | See <a href="#">Table S5</a>                                         | UN Population Estimates (2022) <sup>2</sup>                                                                             | NA                                                                 |
| <b>Transmission</b>               |                                                                                                                                                                        |                                                                      |                                                                                                                         |                                                                    |
| $\lambda[i,j]$                    | $M.tb$ transmission risk (force of infection) in time step $i$ for age $j$<br>$\lambda[i,j] = q \sum_{y=1}^{nygroups} \eta[m,y]z \frac{I[i,y]}{N[i,y]}$                |                                                                      |                                                                                                                         | NA                                                                 |
| $q$                               | Calibrated by $q$ to match TB incidence.<br>Calibration factor for $\lambda$                                                                                           | 1~5                                                                  | Harris RC (2019) <sup>3</sup>                                                                                           | 1.0~3.8                                                            |
| $\eta[m,y]$                       | Daily number of respiratory contacts by participants (infection source) age group $m$ and contacts (infection targets) in age group $y$ .                              | See <a href="#">Figure S1</a>                                        | Read JM (2014) <sup>4</sup><br>Leung K (2017) <sup>5</sup><br>Zhang J (2019) <sup>6</sup><br>Prem K (2021) <sup>7</sup> | NA                                                                 |
| $z$                               | Infectivity (transmission probability) per respiratory contact.                                                                                                        | 0.1                                                                  | Dye C (2008) <sup>8</sup><br>Abu-Raddad LJ (2009) <sup>9</sup><br>Knight GM (2014) <sup>10</sup>                        | NA                                                                 |
| <b>Active TB</b>                  |                                                                                                                                                                        |                                                                      |                                                                                                                         |                                                                    |
| $p[j]$                            | Proportion of (re-)infected individuals, originally uninfected, latently infected or recovered, directly progress to active TB disease, at age $j$                     | $p[j < 15] = 0.01 \sim 0.06$<br>$p[j \geq 15, < 65] = 0.08 \sim 0.2$ | Ferebee SH (1970) <sup>11</sup><br>Comstock GW (1982) <sup>12</sup>                                                     | $p[j < 15]: 0.01 \sim 0.06$<br>$p[j \geq 15, < 65]: 0.08 \sim 0.2$ |

|                      |                                                                                                                                                                          |                                                                                                                                                                                           |                                                                                                                                                                                                                                                                                                                                                                                                                     |                                                                                                                                                                   |
|----------------------|--------------------------------------------------------------------------------------------------------------------------------------------------------------------------|-------------------------------------------------------------------------------------------------------------------------------------------------------------------------------------------|---------------------------------------------------------------------------------------------------------------------------------------------------------------------------------------------------------------------------------------------------------------------------------------------------------------------------------------------------------------------------------------------------------------------|-------------------------------------------------------------------------------------------------------------------------------------------------------------------|
|                      |                                                                                                                                                                          | $p[j \geq 65] = 0.14 \sim 0.36$                                                                                                                                                           | Vynnycky E (1996) <sup>13</sup><br>Vynnycky E (1997) <sup>14</sup><br>Dye C (1998) <sup>15</sup><br>Dye C (2008) <sup>8</sup><br>Abu-Raddad LJ (2009) <sup>9</sup><br>Knight GM (2014) <sup>10</sup><br>Sutherland I (1982) <sup>16</sup><br>Vynnycky E (1996) <sup>13</sup><br>Vynnycky E (1997) <sup>14</sup><br>Abu-Raddad LJ (2009) <sup>9</sup><br>Gomes MGM (2007) <sup>17</sup><br>Dye C (2008) <sup>8</sup> | $p[j \geq 65]: 0.14 \sim 0.36$                                                                                                                                    |
| $x$                  | Risk of re-infection or active disease from latent infection or recovered individuals, relative to uninfected<br>(1-x) is the protection provided by previous infection. | 0.25~0.45                                                                                                                                                                                 |                                                                                                                                                                                                                                                                                                                                                                                                                     | 0.25~0.45                                                                                                                                                         |
| $v[j]$               | Risk of reactivation from latently infected individuals at age $j$                                                                                                       | $v[j < 15]: 0.0001 \sim 0.0003$<br>$v[j \geq 15, j < 55]: 0.0001 \sim 0.0003$<br>$v[j \geq 55, j < 65]: (v[j \geq 15, j < 55] + v[j \geq 65])/2$<br>$v[j \geq 65]: 0.0200 (0.0002, 0.04)$ | Sutherland I (1982) <sup>16</sup><br>Schulzer M (1992) <sup>18</sup><br>Dye C (1998) <sup>15</sup><br>Gomes MGM (2007) <sup>17</sup><br>Schaaf HS (2010) <sup>19</sup><br>Shea KM (2014) <sup>20</sup>                                                                                                                                                                                                              | $v[j < 15]: 0.0001 \sim 0.0003$<br>$v[j \geq 15, j < 55]: 0.0001 \sim 0.0003$<br>$v[j \geq 55, j < 65]: 0.00016 \sim 0.004$<br>$v[j \geq 65]: 0.0002 \sim 0.0078$ |
| <b>Infectious TB</b> |                                                                                                                                                                          |                                                                                                                                                                                           |                                                                                                                                                                                                                                                                                                                                                                                                                     |                                                                                                                                                                   |
| $f[j]$               | Proportion of new active TB cases being infectious at age $j$                                                                                                            | $f[j < 15]: 0.01 \sim 0.15$<br>$f[j \geq 15, < 65]: 0.5 \sim 0.75$<br>$f[j \geq 65]: 0.5 \sim 0.75$                                                                                       | Yoshikawa TT (1992) <sup>21</sup><br>Rajagopalan S (2000) <sup>22</sup><br>Dye C (2008) <sup>8</sup><br>Abu-Raddad LJ (2009) <sup>9</sup><br>Marion CR (2009) <sup>23</sup><br>Schaaf HS (2010) <sup>19</sup>                                                                                                                                                                                                       | $f[j < 15]: 0.01 \sim 0.15$<br>$f[j \geq 15, < 65]: 0.5 \sim 0.75$<br>$f[j \geq 65]: 0.5 \sim 0.75$                                                               |
| $\omega$             | Conversion risk from non-infectious to infectious active disease                                                                                                         | 0.007~0.02                                                                                                                                                                                | Ferebee SH (1970) <sup>11</sup><br>Dye C (1998) <sup>15</sup>                                                                                                                                                                                                                                                                                                                                                       | 0.007~0.02                                                                                                                                                        |
| <b>TB Mortality</b>  |                                                                                                                                                                          |                                                                                                                                                                                           |                                                                                                                                                                                                                                                                                                                                                                                                                     |                                                                                                                                                                   |
| $\mu_i$              | Death risk for untreated or treatment-failed infectious TB cases                                                                                                         | 0.7                                                                                                                                                                                       | Tiemersma EW (2011) <sup>24</sup>                                                                                                                                                                                                                                                                                                                                                                                   | NA                                                                                                                                                                |



|                                         |                                                                                                                                                                                                                                                                                                |                                                                                                                                                        |                                                                                                   |                                                                                                                                        |
|-----------------------------------------|------------------------------------------------------------------------------------------------------------------------------------------------------------------------------------------------------------------------------------------------------------------------------------------------|--------------------------------------------------------------------------------------------------------------------------------------------------------|---------------------------------------------------------------------------------------------------|----------------------------------------------------------------------------------------------------------------------------------------|
| $\mu_{ni}$                              | Death risk for untreated or treatment-failed non-infectious TB cases                                                                                                                                                                                                                           | 0.24                                                                                                                                                   | Tiemersma EW (2011) <sup>24</sup>                                                                 | NA                                                                                                                                     |
| $\mu_{iscale}$                          | Calibration factor for $\mu_i$ and $\mu_{ni}$<br>$\mu_i = (1 + \mu_{iscale}) * \mu_i$<br>$\mu_{ni} = (1 + \mu_{iscale}) * \mu_{ni}$                                                                                                                                                            | $\mu_{iscale}[j < 15]$ : -0.99~-0.01<br>$\mu_{iscale}[j \geq 15, < 65]$ : -0.99~-0.01<br>$\mu_{iscale}[j \geq 65]$ : -0.99~-0.01                       | Schaaf HS (2010) <sup>19</sup>                                                                    | $\mu_{iscale}[j < 15]$ : -0.98~-0.64<br>$\mu_{iscale}[j \geq 15, < 65]$ : -0.98~-0.97<br>$\mu_{iscale}[j \geq 65]$ : -0.95~-0.93       |
| <b>Spontaneous recovery and relapse</b> |                                                                                                                                                                                                                                                                                                |                                                                                                                                                        |                                                                                                   |                                                                                                                                        |
| $n$                                     | Annual spontaneous recovery rate from active TB disease                                                                                                                                                                                                                                        | $n[j < 55]$ : 0.085~0.115<br>$n[j \geq 55, < 65]$ : $(n[j < 55] + n[j \geq 65])/2$<br>$n[j \geq 65]$ : 0.085~0.115                                     | Dye C (1998) <sup>15</sup><br>Abu-Raddad LJ (2009) <sup>9</sup>                                   | $n[j < 55]$ : 0.085~0.11<br>$n[j \geq 55, < 65]$ : 0.086~0.11<br>$n[j \geq 65]$ : 0.085~0.11                                           |
| $r$                                     | Annual risk of relapse from recovered to active TB                                                                                                                                                                                                                                             | $r[j < 15]$ : 0.005~0.015<br>$r[j \geq 15, < 55]$ : 0.005~0.015<br>$r[j \geq 55, < 65]$ : $(r[j < 55] + r[j \geq 65])/2$<br>$r[j \geq 65]$ : 0.005-0.2 | Gomes MG (2004) <sup>25</sup><br>Schaaf HS (2010) <sup>19</sup><br>Knight GM (2014) <sup>10</sup> | $r[j < 15]$ : 0.005~0.015<br>$r[j \geq 15, < 55]$ : 0.005~0.015<br>$r[j \geq 55, < 65]$ : 0.0074~0.038<br>$r[j \geq 65]$ : 0.005-0.063 |
| <b>Case detection</b>                   |                                                                                                                                                                                                                                                                                                |                                                                                                                                                        |                                                                                                   |                                                                                                                                        |
| $CDR[k]$                                | Case detection rate (proportion of new active TB cases detected and started treatment) in year $k$<br>2019 status quo: 88%<br>$\begin{cases} CDR[k] = CDR[k] + (1 - CDR[k]) * CDRscale & \text{if } CDRscale \geq 0 \\ CDR[k] = (1 + CDRscale) * CDR[k] & \text{if } CDRscale < 0 \end{cases}$ | See Table S6                                                                                                                                           | WHO Tuberculosis Data (2022) <sup>26</sup>                                                        | NA                                                                                                                                     |
| $CDRscale$                              | Calibration factor for CDR                                                                                                                                                                                                                                                                     | $CDRscale[j < 55]$ : -0.5~0.99<br>$CDRscale[j \geq 55, < 65]$ : $(r[j < 55] + r[j \geq 65])/2$<br>$CDRscale[j \geq 65]$ : -0.99~-0.2                   | Schaaf HS (2010) <sup>19</sup>                                                                    | $CDRscale[j < 55]$ : 0.16~0.79<br>$CDRscale[j \geq 55, < 65]$ : -0.15~0.23<br>$CDRscale[j \geq 65]$ : -0.98~-0.2                       |
| $e$                                     | Relative probability of case detection of non-infectious TB.                                                                                                                                                                                                                                   | 0.4~0.8                                                                                                                                                | Harris RC (2019) <sup>3</sup>                                                                     | NA                                                                                                                                     |
| <b>Treatment</b>                        |                                                                                                                                                                                                                                                                                                |                                                                                                                                                        |                                                                                                   |                                                                                                                                        |
| $TSR[k]$                                | Treatment success rate (including relapse cases) in year $k$<br>WHO data 1994-2011, then constant $TSR$ from 2011 (95%) onwards.                                                                                                                                                               | See Table S6                                                                                                                                           | WHO Tuberculosis Data (2022) <sup>26</sup>                                                        | NA                                                                                                                                     |
| <b>Vaccination</b>                      |                                                                                                                                                                                                                                                                                                |                                                                                                                                                        |                                                                                                   |                                                                                                                                        |
| $s$                                     | Sensitivity of tuberculin skin test (TST, the pre-vaccination screening test)                                                                                                                                                                                                                  | 77.2% (66.4%-85.3%)                                                                                                                                    | Krutikov M (2022) <sup>27</sup>                                                                   | NA                                                                                                                                     |
| $c[k,j]$                                | Screening and vaccination coverage for those aged $j$ in year $k$                                                                                                                                                                                                                              | 90%                                                                                                                                                    | Assumed                                                                                           | NA                                                                                                                                     |
| $eff$                                   | Vaccine efficacy for preventing active TB disease                                                                                                                                                                                                                                              | 54.7% (29.8%-70.8%)                                                                                                                                    | Efficacy and its lower and higher bounds, results                                                 | NA                                                                                                                                     |

|                 |                                                                                                                                                                |                                              |                                                 |    |
|-----------------|----------------------------------------------------------------------------------------------------------------------------------------------------------------|----------------------------------------------|-------------------------------------------------|----|
| $\theta_R[k,j]$ | Vaccine effective coverage (VEC), proportion of vaccinated individuals at age $j$ that move to the vaccine protection in year $k$ through routine vaccination. | $\theta_R[k,j] = s \times c[k,j] \times eff$ | from the clinical trial <sup>1</sup><br>Assumed | NA |
| $\theta_M[k,j]$ | Vaccine effective coverage (VEC), proportion of vaccinated individuals at age $j$ that move to the vaccine protection in year $k$ through mass vaccination.    | $\theta_M[k,j] = c[k,j] \times eff$          | Assumed                                         | NA |
| $D$             | Duration of protection                                                                                                                                         | 10 years, 20 years, lifelong                 | Assumed                                         | NA |

**Table S4.** Estimated crude birth rates in China during 1900-2050.

| Year      | Birth rate<br>(/1,000) | Year | Birth rate<br>(/1,000) | Year | Birth rate<br>(/1,000) | Year | Birth rate<br>(/1,000) |
|-----------|------------------------|------|------------------------|------|------------------------|------|------------------------|
| 1900-1950 | 41.049                 | 1975 | 25.105                 | 2000 | 13.755                 | 2025 | 7.330                  |
| 1951      | 40.094                 | 1976 | 23.551                 | 2001 | 12.943                 | 2026 | 7.255                  |
| 1952      | 45.052                 | 1977 | 21.448                 | 2002 | 12.735                 | 2027 | 7.196                  |
| 1953      | 41.844                 | 1978 | 21.091                 | 2003 | 12.575                 | 2028 | 7.141                  |
| 1954      | 43.083                 | 1979 | 21.881                 | 2004 | 12.707                 | 2029 | 7.111                  |
| 1955      | 42.607                 | 1980 | 22.279                 | 2005 | 12.766                 | 2030 | 7.075                  |
| 1956      | 39.574                 | 1981 | 22.852                 | 2006 | 12.892                 | 2031 | 7.065                  |
| 1957      | 42.842                 | 1982 | 24.271                 | 2007 | 13.077                 | 2032 | 7.074                  |
| 1958      | 37.775                 | 1983 | 21.215                 | 2008 | 13.368                 | 2033 | 7.090                  |
| 1959      | 31.406                 | 1984 | 22.000                 | 2009 | 13.502                 | 2034 | 7.086                  |
| 1960      | 29.804                 | 1985 | 22.809                 | 2010 | 13.308                 | 2035 | 7.144                  |
| 1961      | 26.185                 | 1986 | 24.229                 | 2011 | 13.136                 | 2037 | 7.291                  |
| 1962      | 40.402                 | 1987 | 25.176                 | 2012 | 14.070                 | 2038 | 7.391                  |
| 1963      | 48.988                 | 1988 | 23.655                 | 2013 | 13.269                 | 2039 | 7.457                  |
| 1964      | 42.914                 | 1989 | 23.962                 | 2014 | 13.506                 | 2040 | 7.514                  |
| 1965      | 41.830                 | 1990 | 24.436                 | 2015 | 12.522                 | 2041 | 7.572                  |
| 1966      | 39.562                 | 1991 | 19.444                 | 2016 | 13.038                 | 2042 | 7.625                  |
| 1967      | 36.267                 | 1992 | 17.811                 | 2017 | 13.065                 | 2043 | 7.607                  |
| 1968      | 40.554                 | 1993 | 16.834                 | 2018 | 10.948                 | 2044 | 7.632                  |
| 1969      | 38.589                 | 1994 | 16.067                 | 2019 | 10.293                 | 2045 | 7.553                  |
| 1970      | 38.337                 | 1995 | 15.454                 | 2020 | 8.597                  | 2046 | 7.477                  |
| 1971      | 35.288                 | 1996 | 14.722                 | 2021 | 7.633                  | 2047 | 7.384                  |
| 1972      | 33.097                 | 1997 | 14.123                 | 2022 | 7.544                  | 2048 | 7.246                  |
| 1973      | 31.317                 | 1998 | 13.617                 | 2023 | 7.477                  | 2049 | 7.078                  |
| 1974      | 28.535                 | 1999 | 13.292                 | 2024 | 7.421                  | 2050 | 6.896                  |

Source: Adapted from United Nations Population Estimates (2022), Table “WPP2022\_Demographic\_Indicators\_Medium.csv”.

<https://population.un.org/wpp/Download/Standard/CSV/>

**Table S5.** Estimated central death rates in China during 1900-2050.

| Age<br>Year | 0        | 1-4      | 5-9      | 10-14    | 15-19    | 20-24    | 25-29-   | 30-34    | 35-39    | 40-44    | 45-49    |
|-------------|----------|----------|----------|----------|----------|----------|----------|----------|----------|----------|----------|
| 1900-1950   | 0.145220 | 0.023109 | 0.008913 | 0.005776 | 0.005089 | 0.006308 | 0.007128 | 0.008084 | 0.009622 | 0.013297 | 0.016943 |
| 1951        | 0.141263 | 0.022098 | 0.008583 | 0.005469 | 0.004845 | 0.006012 | 0.006765 | 0.007686 | 0.009211 | 0.012792 | 0.016365 |
| 1952        | 0.137154 | 0.021091 | 0.007935 | 0.005201 | 0.004639 | 0.005778 | 0.006477 | 0.007355 | 0.008867 | 0.012379 | 0.015906 |
| 1953        | 0.133564 | 0.020234 | 0.008575 | 0.004912 | 0.004411 | 0.005519 | 0.006172 | 0.006992 | 0.008478 | 0.011898 | 0.015349 |
| 1954        | 0.131577 | 0.019778 | 0.007427 | 0.004693 | 0.004238 | 0.005329 | 0.005953 | 0.006717 | 0.008181 | 0.011546 | 0.014954 |
| 1955        | 0.128100 | 0.018976 | 0.007206 | 0.004578 | 0.004150 | 0.005251 | 0.005873 | 0.006594 | 0.008059 | 0.011454 | 0.014903 |
| 1956        | 0.124765 | 0.018221 | 0.006943 | 0.004416 | 0.004013 | 0.005117 | 0.005736 | 0.006407 | 0.007837 | 0.011200 | 0.014639 |
| 1957        | 0.121659 | 0.017519 | 0.006752 | 0.004271 | 0.003871 | 0.004962 | 0.005584 | 0.006217 | 0.007605 | 0.010939 | 0.014376 |
| 1958        | 0.118301 | 0.016778 | 0.006675 | 0.004155 | 0.003741 | 0.004826 | 0.005457 | 0.006060 | 0.007395 | 0.010696 | 0.014138 |
| 1959        | 0.116415 | 0.016109 | 0.006595 | 0.004036 | 0.003622 | 0.004707 | 0.005337 | 0.005960 | 0.007286 | 0.010457 | 0.013961 |
| 1960        | 0.114546 | 0.015508 | 0.006525 | 0.003912 | 0.003507 | 0.004588 | 0.005219 | 0.005852 | 0.007177 | 0.010218 | 0.013723 |
| 1961        | 0.112723 | 0.014975 | 0.006458 | 0.003793 | 0.003388 | 0.004469 | 0.005100 | 0.005734 | 0.007025 | 0.010000 | 0.013485 |
| 1962        | 0.110954 | 0.014492 | 0.006391 | 0.003674 | 0.003269 | 0.004350 | 0.004981 | 0.005615 | 0.006916 | 0.009781 | 0.013247 |
| 1963        | 0.109225 | 0.014049 | 0.006324 | 0.003555 | 0.003150 | 0.004231 | 0.004862 | 0.005496 | 0.006807 | 0.009662 | 0.013009 |
| 1964        | 0.107556 | 0.013634 | 0.006257 | 0.003436 | 0.003031 | 0.004112 | 0.004743 | 0.005377 | 0.006698 | 0.009543 | 0.012771 |
| 1965        | 0.105937 | 0.013253 | 0.006190 | 0.003317 | 0.002912 | 0.004003 | 0.004624 | 0.005258 | 0.006579 | 0.009424 | 0.012533 |
| 1966        | 0.104368 | 0.012914 | 0.006141 | 0.003203 | 0.002793 | 0.003894 | 0.004505 | 0.005146 | 0.006460 | 0.009305 | 0.012295 |
| 1967        | 0.102849 | 0.012615 | 0.006092 | 0.003089 | 0.002674 | 0.003785 | 0.004386 | 0.005027 | 0.006341 | 0.009186 | 0.012057 |
| 1968        | 0.101370 | 0.012356 | 0.006043 | 0.002975 | 0.002555 | 0.003676 | 0.004267 | 0.004908 | 0.006222 | 0.009067 | 0.011819 |
| 1969        | 0.100000 | 0.012137 | 0.006000 | 0.002861 | 0.002436 | 0.003567 | 0.004148 | 0.004789 | 0.006103 | 0.008948 | 0.011581 |
| 1970        | 0.098721 | 0.011958 | 0.005963 | 0.002747 | 0.002317 | 0.003458 | 0.004029 | 0.004670 | 0.006014 | 0.008829 | 0.011343 |
| 1971        | 0.097532 | 0.011819 | 0.005930 | 0.002633 | 0.002198 | 0.003349 | 0.003910 | 0.004551 | 0.005925 | 0.008710 | 0.011105 |
| 1972        | 0.096433 | 0.011710 | 0.005900 | 0.002519 | 0.002079 | 0.003240 | 0.003791 | 0.004432 | 0.005836 | 0.008601 | 0.010867 |
| 1973        | 0.095424 | 0.011621 | 0.005873 | 0.002405 | 0.001960 | 0.003131 | 0.003682 | 0.004323 | 0.005777 | 0.008502 | 0.010629 |
| 1974        | 0.094505 | 0.011552 | 0.005856 | 0.002291 | 0.001841 | 0.003022 | 0.003573 | 0.004214 | 0.005728 | 0.008403 | 0.010391 |
| 1975        | 0.093676 | 0.011503 | 0.005848 | 0.002177 | 0.001722 | 0.002913 | 0.003464 | 0.004105 | 0.005689 | 0.008304 | 0.010153 |
| 1976        | 0.092927 | 0.011474 | 0.005849 | 0.002063 | 0.001603 | 0.002804 | 0.003355 | 0.004006 | 0.005650 | 0.008205 | 0.009915 |
| 1977        | 0.092248 | 0.011465 | 0.005858 | 0.001949 | 0.001484 | 0.002695 | 0.003246 | 0.003907 | 0.005611 | 0.008106 | 0.009677 |
| 1978        | 0.091629 | 0.011476 | 0.005875 | 0.001835 | 0.001365 | 0.002586 | 0.003137 | 0.003808 | 0.005572 | 0.008007 | 0.009439 |
| 1979        | 0.091060 | 0.011507 | 0.005900 | 0.001721 | 0.001246 | 0.002477 | 0.003028 | 0.003709 | 0.005533 | 0.007908 | 0.009201 |
| 1980        | 0.090541 | 0.011558 | 0.005933 | 0.001607 | 0.001127 | 0.002368 | 0.002919 | 0.003600 | 0.005494 | 0.007809 | 0.008963 |
| 1981        | 0.090072 | 0.011629 | 0.005976 | 0.001493 | 0.001008 | 0.002259 | 0.002810 | 0.003491 | 0.005455 | 0.007710 | 0.008725 |
| 1982        | 0.089653 | 0.011720 | 0.006029 | 0.001384 | 0.000889 | 0.002150 | 0.002701 | 0.003382 | 0.005416 | 0.007611 | 0.008487 |
| 1983        | 0.089284 | 0.011831 | 0.006092 | 0.001270 | 0.000770 | 0.002041 | 0.002592 | 0.003273 | 0.005377 | 0.007512 | 0.008249 |
| 1984        | 0.088965 | 0.011962 | 0.006165 | 0.001156 | 0.000651 | 0.001932 | 0.002483 | 0.003164 | 0.005338 | 0.007413 | 0.008011 |
| 1985        | 0.088696 | 0.012113 | 0.006248 | 0.001042 | 0.000532 | 0.001823 | 0.002374 | 0.003055 | 0.005299 | 0.007314 | 0.007773 |
| 1986        | 0.088477 | 0.012284 | 0.006341 | 0.000928 | 0.000413 | 0.001714 | 0.002265 | 0.002946 | 0.005260 | 0.007215 | 0.007535 |
| 1987        | 0.088308 | 0.012475 | 0.006444 | 0.000814 | 0.000294 | 0.001605 | 0.002156 | 0.002837 | 0.005221 | 0.007116 | 0.007297 |
| 1988        | 0.088189 | 0.012686 | 0.006557 | 0.000700 | 0.000175 | 0.001496 | 0.002047 | 0.002728 | 0.005182 | 0.007017 | 0.007059 |
| 1989        | 0.088120 | 0.012917 | 0.006680 | 0.000586 | 0.000056 | 0.001387 | 0.001938 | 0.002619 | 0.005143 | 0.006918 | 0.006821 |

|      |          |          |          |          |          |          |          |          |          |          |          |
|------|----------|----------|----------|----------|----------|----------|----------|----------|----------|----------|----------|
| 1990 | 0.042210 | 0.003415 | 0.001379 | 0.001034 | 0.001028 | 0.001417 | 0.001670 | 0.001870 | 0.002239 | 0.003348 | 0.004677 |
| 1991 | 0.041844 | 0.003377 | 0.001360 | 0.000996 | 0.000992 | 0.001374 | 0.001642 | 0.001849 | 0.002217 | 0.003279 | 0.004573 |
| 1992 | 0.041122 | 0.003287 | 0.001317 | 0.000933 | 0.000927 | 0.001288 | 0.001562 | 0.001771 | 0.002127 | 0.003114 | 0.004348 |
| 1993 | 0.040170 | 0.003174 | 0.001288 | 0.000888 | 0.000871 | 0.001221 | 0.001498 | 0.001712 | 0.002057 | 0.002983 | 0.004189 |
| 1994 | 0.038999 | 0.003041 | 0.001272 | 0.000865 | 0.000832 | 0.001176 | 0.001456 | 0.001682 | 0.002021 | 0.002896 | 0.004121 |
| 1995 | 0.037713 | 0.002901 | 0.001245 | 0.000834 | 0.000787 | 0.001121 | 0.001396 | 0.001630 | 0.001963 | 0.002819 | 0.003959 |
| 1996 | 0.036298 | 0.002741 | 0.001247 | 0.000827 | 0.000758 | 0.001080 | 0.001351 | 0.001602 | 0.001943 | 0.002795 | 0.003886 |
| 1997 | 0.034774 | 0.002571 | 0.001232 | 0.000812 | 0.000724 | 0.001030 | 0.001294 | 0.001556 | 0.001900 | 0.002738 | 0.003770 |
| 1998 | 0.033229 | 0.002413 | 0.001163 | 0.000798 | 0.000693 | 0.000974 | 0.001234 | 0.001502 | 0.001848 | 0.002665 | 0.003637 |
| 1999 | 0.031502 | 0.002233 | 0.001102 | 0.000802 | 0.000680 | 0.000940 | 0.001200 | 0.001475 | 0.001836 | 0.002647 | 0.003566 |
| 2000 | 0.029634 | 0.002047 | 0.001018 | 0.000795 | 0.000662 | 0.000895 | 0.001151 | 0.001423 | 0.001793 | 0.002594 | 0.003505 |
| 2001 | 0.027670 | 0.001860 | 0.000945 | 0.000768 | 0.000634 | 0.000836 | 0.001078 | 0.001338 | 0.001708 | 0.002488 | 0.003369 |
| 2002 | 0.025648 | 0.001675 | 0.000903 | 0.000763 | 0.000629 | 0.000807 | 0.001038 | 0.001294 | 0.001675 | 0.002456 | 0.003332 |
| 2003 | 0.023599 | 0.001495 | 0.000841 | 0.000751 | 0.000627 | 0.000783 | 0.000995 | 0.001252 | 0.001640 | 0.002425 | 0.003291 |
| 2004 | 0.021638 | 0.001331 | 0.000780 | 0.000731 | 0.000626 | 0.000764 | 0.000955 | 0.001210 | 0.001602 | 0.002392 | 0.003247 |
| 2005 | 0.019811 | 0.001186 | 0.000763 | 0.000704 | 0.000625 | 0.000749 | 0.000916 | 0.001169 | 0.001557 | 0.002354 | 0.003205 |
| 2006 | 0.018153 | 0.001061 | 0.000740 | 0.000672 | 0.000621 | 0.000735 | 0.000877 | 0.001122 | 0.001502 | 0.002301 | 0.003151 |
| 2007 | 0.016682 | 0.000952 | 0.000714 | 0.000650 | 0.000621 | 0.000734 | 0.000853 | 0.001088 | 0.001462 | 0.002275 | 0.003134 |
| 2008 | 0.015490 | 0.000925 | 0.000721 | 0.000679 | 0.000657 | 0.000775 | 0.000873 | 0.001093 | 0.001468 | 0.002287 | 0.003162 |
| 2009 | 0.014205 | 0.000781 | 0.000628 | 0.000615 | 0.000599 | 0.000732 | 0.000811 | 0.001004 | 0.001372 | 0.002183 | 0.003061 |
| 2010 | 0.013177 | 0.000720 | 0.000598 | 0.000605 | 0.000582 | 0.000736 | 0.000800 | 0.000969 | 0.001332 | 0.002132 | 0.003025 |
| 2011 | 0.012191 | 0.000653 | 0.000537 | 0.000587 | 0.000556 | 0.000732 | 0.000787 | 0.000930 | 0.001282 | 0.002065 | 0.002970 |
| 2012 | 0.011294 | 0.000599 | 0.000487 | 0.000565 | 0.000535 | 0.000728 | 0.000781 | 0.000899 | 0.001236 | 0.001998 | 0.002917 |
| 2013 | 0.010460 | 0.000550 | 0.000444 | 0.000536 | 0.000518 | 0.000719 | 0.000780 | 0.000874 | 0.001188 | 0.001936 | 0.002863 |
| 2014 | 0.009685 | 0.000507 | 0.000406 | 0.000501 | 0.000504 | 0.000703 | 0.000780 | 0.000854 | 0.001141 | 0.001874 | 0.002800 |
| 2015 | 0.008967 | 0.000466 | 0.000373 | 0.000463 | 0.000493 | 0.000680 | 0.000780 | 0.000839 | 0.001097 | 0.001814 | 0.002729 |
| 2016 | 0.008310 | 0.000432 | 0.000345 | 0.000426 | 0.000483 | 0.000655 | 0.000781 | 0.000831 | 0.001059 | 0.001756 | 0.002655 |
| 2017 | 0.007690 | 0.000399 | 0.000324 | 0.000399 | 0.000477 | 0.000645 | 0.000796 | 0.000845 | 0.001049 | 0.001737 | 0.002638 |
| 2018 | 0.007123 | 0.000371 | 0.000296 | 0.000356 | 0.000441 | 0.000607 | 0.000766 | 0.000821 | 0.000993 | 0.001625 | 0.002488 |
| 2019 | 0.006597 | 0.000345 | 0.000274 | 0.000328 | 0.000415 | 0.000593 | 0.000749 | 0.000823 | 0.000971 | 0.001563 | 0.002412 |
| 2020 | 0.006116 | 0.000323 | 0.000259 | 0.000306 | 0.000388 | 0.000584 | 0.000731 | 0.000830 | 0.000962 | 0.001517 | 0.002356 |
| 2021 | 0.005682 | 0.000303 | 0.000235 | 0.000284 | 0.000356 | 0.000572 | 0.000703 | 0.000831 | 0.000951 | 0.001463 | 0.002278 |
| 2022 | 0.005910 | 0.000312 | 0.000250 | 0.000302 | 0.000384 | 0.000553 | 0.000703 | 0.000775 | 0.000917 | 0.001478 | 0.002281 |
| 2023 | 0.005727 | 0.000303 | 0.000242 | 0.000293 | 0.000374 | 0.000539 | 0.000687 | 0.000758 | 0.000899 | 0.001448 | 0.002236 |
| 2024 | 0.005543 | 0.000293 | 0.000234 | 0.000283 | 0.000364 | 0.000526 | 0.000670 | 0.000742 | 0.000880 | 0.001418 | 0.002191 |
| 2025 | 0.005367 | 0.000284 | 0.000227 | 0.000275 | 0.000354 | 0.000512 | 0.000654 | 0.000725 | 0.000862 | 0.001389 | 0.002147 |
| 2026 | 0.005202 | 0.000275 | 0.000219 | 0.000266 | 0.000344 | 0.000499 | 0.000638 | 0.000709 | 0.000844 | 0.001360 | 0.002103 |
| 2027 | 0.005038 | 0.000266 | 0.000212 | 0.000257 | 0.000335 | 0.000487 | 0.000622 | 0.000693 | 0.000826 | 0.001332 | 0.002060 |
| 2028 | 0.004883 | 0.000258 | 0.000206 | 0.000249 | 0.000325 | 0.000474 | 0.000607 | 0.000677 | 0.000809 | 0.001304 | 0.002019 |
| 2029 | 0.004728 | 0.000250 | 0.000199 | 0.000241 | 0.000316 | 0.000462 | 0.000592 | 0.000662 | 0.000792 | 0.001277 | 0.001977 |
| 2030 | 0.004582 | 0.000242 | 0.000193 | 0.000233 | 0.000307 | 0.000450 | 0.000577 | 0.000646 | 0.000775 | 0.001250 | 0.001936 |
| 2031 | 0.004446 | 0.000235 | 0.000187 | 0.000226 | 0.000299 | 0.000438 | 0.000563 | 0.000631 | 0.000758 | 0.001224 | 0.001896 |
| 2032 | 0.004309 | 0.000228 | 0.000180 | 0.000219 | 0.000290 | 0.000427 | 0.000548 | 0.000616 | 0.000742 | 0.001198 | 0.001857 |
| 2033 | 0.004181 | 0.000221 | 0.000175 | 0.000211 | 0.000282 | 0.000415 | 0.000534 | 0.000601 | 0.000725 | 0.001172 | 0.001818 |

| 2034 | 0.004060  | 0.000214 | 0.000169 | 0.000205 | 0.000274 | 0.000404 | 0.000521 | 0.000587 | 0.000709 | 0.001147 | 0.001780 |   |
|------|-----------|----------|----------|----------|----------|----------|----------|----------|----------|----------|----------|---|
| 2035 | 0.003939  | 0.000208 | 0.000164 | 0.000198 | 0.000266 | 0.000394 | 0.000507 | 0.000573 | 0.000694 | 0.001123 | 0.001743 |   |
| 2036 | 0.003822  | 0.000201 | 0.000158 | 0.000191 | 0.000259 | 0.000383 | 0.000494 | 0.000559 | 0.000678 | 0.001098 | 0.001706 |   |
| 2037 | 0.003715  | 0.000196 | 0.000153 | 0.000185 | 0.000251 | 0.000373 | 0.000481 | 0.000545 | 0.000663 | 0.001074 | 0.001670 |   |
| 2038 | 0.003608  | 0.000190 | 0.000149 | 0.000179 | 0.000244 | 0.000363 | 0.000469 | 0.000532 | 0.000648 | 0.001051 | 0.001635 |   |
| 2039 | 0.003509  | 0.000184 | 0.000144 | 0.000174 | 0.000237 | 0.000353 | 0.000456 | 0.000519 | 0.000633 | 0.001028 | 0.001600 |   |
| 2040 | 0.003410  | 0.000179 | 0.000139 | 0.000168 | 0.000230 | 0.000344 | 0.000445 | 0.000506 | 0.000619 | 0.001005 | 0.001566 |   |
| 2041 | 0.003339  | 0.000174 | 0.000135 | 0.000163 | 0.000224 | 0.000335 | 0.000433 | 0.000494 | 0.000605 | 0.000983 | 0.001534 |   |
| 2042 | 0.003257  | 0.000170 | 0.000131 | 0.000158 | 0.000218 | 0.000326 | 0.000422 | 0.000483 | 0.000592 | 0.000962 | 0.001501 |   |
| 2043 | 0.003180  | 0.000166 | 0.000128 | 0.000153 | 0.000212 | 0.000318 | 0.000412 | 0.000471 | 0.000579 | 0.000941 | 0.001471 |   |
| 2044 | 0.003102  | 0.000161 | 0.000124 | 0.000148 | 0.000207 | 0.000310 | 0.000401 | 0.000460 | 0.000566 | 0.000920 | 0.001440 |   |
| 2045 | 0.003029  | 0.000157 | 0.000120 | 0.000144 | 0.000201 | 0.000302 | 0.000391 | 0.000449 | 0.000553 | 0.000900 | 0.001410 |   |
| 2046 | 0.002960  | 0.000153 | 0.000117 | 0.000140 | 0.000196 | 0.000295 | 0.000382 | 0.000439 | 0.000541 | 0.000881 | 0.001381 |   |
| 2047 | 0.002900  | 0.000150 | 0.000114 | 0.000136 | 0.000191 | 0.000288 | 0.000373 | 0.000429 | 0.000531 | 0.000864 | 0.001354 |   |
| 2048 | 0.002843  | 0.000147 | 0.000111 | 0.000132 | 0.000187 | 0.000281 | 0.000365 | 0.000420 | 0.000520 | 0.000846 | 0.001328 |   |
| 2049 | 0.002787  | 0.000143 | 0.000108 | 0.000129 | 0.000182 | 0.000275 | 0.000356 | 0.000411 | 0.000509 | 0.000829 | 0.001302 |   |
| 2050 | 0.002733  | 0.000140 | 0.000105 | 0.000125 | 0.000178 | 0.000268 | 0.000348 | 0.000402 | 0.000499 | 0.000813 | 0.001276 |   |
| Age  | 50-54     | 55-59    | 60-64    | 65-69    | 70-74    | 75-79    | 80-84    | 85-89    | 90-94    | 95-99    | 100      |   |
| Year | 1900-1950 | 0.024491 | 0.032736 | 0.052600 | 0.075011 | 0.105660 | 0.147352 | 0.209322 | 0.286471 | 0.377208 | 0.494742 | 1 |
| 1951 | 0.023571  | 0.031629 | 0.051107 | 0.073417 | 0.103653 | 0.145171 | 0.208077 | 0.286150 | 0.379979 | 0.502354 | 1        |   |
| 1952 | 0.022861  | 0.030717 | 0.049961 | 0.072129 | 0.102344 | 0.143429 | 0.207668 | 0.286291 | 0.383602 | 0.507312 | 1        |   |
| 1953 | 0.022051  | 0.029592 | 0.048499 | 0.070308 | 0.100609 | 0.140852 | 0.206250 | 0.285112 | 0.386470 | 0.515678 | 1        |   |
| 1954 | 0.021515  | 0.028781 | 0.047487 | 0.069084 | 0.099760 | 0.139362 | 0.205996 | 0.285671 | 0.391533 | 0.528575 | 1        |   |
| 1955 | 0.021524  | 0.028686 | 0.047592 | 0.069462 | 0.101058 | 0.140865 | 0.209592 | 0.292290 | 0.403205 | 0.543004 | 1        |   |
| 1956 | 0.021217  | 0.028172 | 0.046911 | 0.068808 | 0.100807 | 0.140778 | 0.210262 | 0.295803 | 0.409635 | 0.554060 | 1        |   |
| 1957 | 0.020929  | 0.027732 | 0.046246 | 0.068249 | 0.100499 | 0.141026 | 0.210760 | 0.299516 | 0.415490 | 0.568890 | 1        |   |
| 1958 | 0.020668  | 0.027380 | 0.045610 | 0.067748 | 0.100114 | 0.141505 | 0.211073 | 0.303108 | 0.421144 | 0.572308 | 1        |   |
| 1959 | 0.026143  | 0.034632 | 0.055227 | 0.081337 | 0.119002 | 0.167968 | 0.237257 | 0.331922 | 0.451714 | 0.615195 | 1        |   |
| 1960 | 0.030885  | 0.040969 | 0.063616 | 0.093155 | 0.135499 | 0.191202 | 0.260421 | 0.356782 | 0.479658 | 0.640950 | 1        |   |
| 1961 | 0.025409  | 0.033835 | 0.053638 | 0.079521 | 0.117191 | 0.167363 | 0.236682 | 0.334080 | 0.461945 | 0.625314 | 1        |   |
| 1962 | 0.019433  | 0.026071 | 0.042878 | 0.064640 | 0.097198 | 0.141084 | 0.211056 | 0.308903 | 0.442019 | 0.608608 | 1        |   |
| 1963 | 0.018964  | 0.025541 | 0.041999 | 0.063243 | 0.095723 | 0.139496 | 0.210270 | 0.307188 | 0.444175 | 0.613768 | 1        |   |
| 1964 | 0.018366  | 0.024828 | 0.040904 | 0.061406 | 0.093513 | 0.136796 | 0.207972 | 0.303202 | 0.442382 | 0.615273 | 1        |   |
| 1965 | 0.017768  | 0.024126 | 0.039868 | 0.059604 | 0.091185 | 0.133897 | 0.205109 | 0.298781 | 0.438560 | 0.612151 | 1        |   |
| 1966 | 0.017132  | 0.023365 | 0.038730 | 0.057700 | 0.088567 | 0.130759 | 0.201762 | 0.294700 | 0.433904 | 0.613185 | 1        |   |
| 1967 | 0.016496  | 0.022624 | 0.037662 | 0.055994 | 0.086022 | 0.127760 | 0.198187 | 0.291025 | 0.428515 | 0.610025 | 1        |   |
| 1968 | 0.015863  | 0.021889 | 0.036601 | 0.054421 | 0.083501 | 0.124819 | 0.194480 | 0.287801 | 0.423084 | 0.605231 | 1        |   |
| 1969 | 0.015280  | 0.021224 | 0.035639 | 0.053090 | 0.081198 | 0.122067 | 0.190937 | 0.284894 | 0.418077 | 0.599743 | 1        |   |
| 1970 | 0.014614  | 0.020434 | 0.034483 | 0.051528 | 0.078510 | 0.118556 | 0.186278 | 0.280091 | 0.411138 | 0.590450 | 1        |   |
| 1971 | 0.013864  | 0.019504 | 0.033121 | 0.049712 | 0.075521 | 0.114441 | 0.180879 | 0.273889 | 0.403598 | 0.579183 | 1        |   |
| 1972 | 0.013240  | 0.018733 | 0.032006 | 0.048245 | 0.073130 | 0.110810 | 0.176076 | 0.267790 | 0.396843 | 0.568912 | 1        |   |
| 1973 | 0.012514  | 0.017799 | 0.030605 | 0.046327 | 0.070198 | 0.106108 | 0.169509 | 0.258632 | 0.386173 | 0.553745 | 1        |   |
| 1974 | 0.012021  | 0.017167 | 0.029698 | 0.045108 | 0.068424 | 0.102912 | 0.164993 | 0.252329 | 0.379422 | 0.544616 | 1        |   |

|      |          |          |          |          |          |          |          |          |          |          |   |
|------|----------|----------|----------|----------|----------|----------|----------|----------|----------|----------|---|
| 1975 | 0.011572 | 0.016582 | 0.028883 | 0.044086 | 0.067073 | 0.100435 | 0.161565 | 0.247973 | 0.375525 | 0.541530 | 1 |
| 1976 | 0.011100 | 0.015953 | 0.027997 | 0.043001 | 0.065696 | 0.098008 | 0.158018 | 0.243647 | 0.371262 | 0.538331 | 1 |
| 1977 | 0.010681 | 0.015349 | 0.027088 | 0.041857 | 0.064235 | 0.095580 | 0.153995 | 0.238543 | 0.365137 | 0.532999 | 1 |
| 1978 | 0.010334 | 0.014818 | 0.026288 | 0.040876 | 0.063022 | 0.093711 | 0.150546 | 0.234267 | 0.359847 | 0.529382 | 1 |
| 1979 | 0.010010 | 0.014300 | 0.025479 | 0.039884 | 0.061789 | 0.092005 | 0.147182 | 0.229958 | 0.354508 | 0.523948 | 1 |
| 1980 | 0.009743 | 0.013850 | 0.024754 | 0.038996 | 0.060736 | 0.090669 | 0.144323 | 0.226032 | 0.349753 | 0.518897 | 1 |
| 1981 | 0.009467 | 0.013396 | 0.023983 | 0.037998 | 0.059548 | 0.089210 | 0.141392 | 0.221551 | 0.344212 | 0.511843 | 1 |
| 1982 | 0.009215 | 0.012992 | 0.023256 | 0.037041 | 0.058432 | 0.087926 | 0.138964 | 0.217396 | 0.339217 | 0.506168 | 1 |
| 1983 | 0.008983 | 0.012632 | 0.022561 | 0.036106 | 0.057338 | 0.086670 | 0.136825 | 0.213231 | 0.334000 | 0.500102 | 1 |
| 1984 | 0.008753 | 0.012299 | 0.021884 | 0.035168 | 0.056250 | 0.085459 | 0.135076 | 0.209523 | 0.329328 | 0.494971 | 1 |
| 1985 | 0.008537 | 0.012010 | 0.021265 | 0.034269 | 0.055178 | 0.084290 | 0.133523 | 0.206000 | 0.324284 | 0.488363 | 1 |
| 1986 | 0.008313 | 0.011727 | 0.020665 | 0.033346 | 0.054011 | 0.083035 | 0.131978 | 0.202652 | 0.318904 | 0.480863 | 1 |
| 1987 | 0.008082 | 0.011442 | 0.020083 | 0.032384 | 0.052725 | 0.081574 | 0.130159 | 0.199121 | 0.312454 | 0.471160 | 1 |
| 1988 | 0.007857 | 0.011170 | 0.019553 | 0.031456 | 0.051471 | 0.080191 | 0.128592 | 0.196493 | 0.307090 | 0.461920 | 1 |
| 1989 | 0.007657 | 0.010943 | 0.019138 | 0.030674 | 0.050405 | 0.079107 | 0.127584 | 0.195154 | 0.303482 | 0.455164 | 1 |
| 1990 | 0.007525 | 0.010810 | 0.018938 | 0.030225 | 0.049845 | 0.078811 | 0.128044 | 0.196524 | 0.304204 | 0.453999 | 1 |
| 1991 | 0.007375 | 0.010660 | 0.018738 | 0.029817 | 0.049329 | 0.078634 | 0.129051 | 0.199506 | 0.308490 | 0.460423 | 1 |
| 1992 | 0.007007 | 0.010200 | 0.017988 | 0.028504 | 0.047130 | 0.075508 | 0.124735 | 0.193633 | 0.298428 | 0.444335 | 1 |
| 1993 | 0.006715 | 0.009848 | 0.017436 | 0.027542 | 0.045421 | 0.073077 | 0.121472 | 0.189395 | 0.291297 | 0.430768 | 1 |
| 1994 | 0.006533 | 0.009645 | 0.017170 | 0.027114 | 0.044589 | 0.072107 | 0.120866 | 0.189923 | 0.292922 | 0.433513 | 1 |
| 1995 | 0.006269 | 0.009305 | 0.016641 | 0.026293 | 0.043021 | 0.069736 | 0.117608 | 0.185923 | 0.287313 | 0.425262 | 1 |
| 1996 | 0.006147 | 0.009155 | 0.016477 | 0.026112 | 0.042555 | 0.069122 | 0.117362 | 0.187075 | 0.290538 | 0.430191 | 1 |
| 1997 | 0.005970 | 0.008884 | 0.016104 | 0.025604 | 0.041584 | 0.067527 | 0.115311 | 0.185198 | 0.289239 | 0.430032 | 1 |
| 1998 | 0.005786 | 0.008566 | 0.015634 | 0.024930 | 0.040353 | 0.065291 | 0.111857 | 0.180653 | 0.283180 | 0.422413 | 1 |
| 1999 | 0.005752 | 0.008421 | 0.015488 | 0.024859 | 0.040270 | 0.065086 | 0.112276 | 0.183158 | 0.290347 | 0.436499 | 1 |
| 2000 | 0.005588 | 0.008172 | 0.015109 | 0.024350 | 0.039465 | 0.063419 | 0.109569 | 0.179740 | 0.286549 | 0.432584 | 1 |
| 2001 | 0.005316 | 0.007764 | 0.014395 | 0.023272 | 0.037748 | 0.060213 | 0.103804 | 0.170780 | 0.273263 | 0.413149 | 1 |
| 2002 | 0.005203 | 0.007606 | 0.014091 | 0.022936 | 0.037323 | 0.059324 | 0.102213 | 0.169018 | 0.272677 | 0.414308 | 1 |
| 2003 | 0.005090 | 0.007478 | 0.013778 | 0.022593 | 0.036916 | 0.058534 | 0.100639 | 0.167158 | 0.271828 | 0.415875 | 1 |
| 2004 | 0.004964 | 0.007389 | 0.013470 | 0.022234 | 0.036510 | 0.057836 | 0.099092 | 0.165171 | 0.270662 | 0.419542 | 1 |
| 2005 | 0.004914 | 0.007225 | 0.013156 | 0.021830 | 0.036024 | 0.057122 | 0.097415 | 0.162737 | 0.268453 | 0.416113 | 1 |
| 2006 | 0.004837 | 0.007039 | 0.012794 | 0.021299 | 0.035359 | 0.056234 | 0.095548 | 0.159873 | 0.265473 | 0.415023 | 1 |
| 2007 | 0.004820 | 0.006946 | 0.012628 | 0.021001 | 0.035092 | 0.055962 | 0.094709 | 0.158272 | 0.263911 | 0.415041 | 1 |
| 2008 | 0.004844 | 0.006899 | 0.012545 | 0.020712 | 0.034823 | 0.055687 | 0.093914 | 0.156529 | 0.262044 | 0.415762 | 1 |
| 2009 | 0.004711 | 0.006643 | 0.012296 | 0.020133 | 0.034117 | 0.054902 | 0.092656 | 0.154073 | 0.258963 | 0.412612 | 1 |
| 2010 | 0.004668 | 0.006599 | 0.012071 | 0.019726 | 0.033598 | 0.054328 | 0.091787 | 0.151992 | 0.256062 | 0.409368 | 1 |
| 2011 | 0.004610 | 0.006527 | 0.011825 | 0.019288 | 0.032950 | 0.053582 | 0.090770 | 0.149732 | 0.252517 | 0.405612 | 1 |
| 2012 | 0.004555 | 0.006462 | 0.011582 | 0.018907 | 0.032257 | 0.052789 | 0.089679 | 0.147431 | 0.248386 | 0.399128 | 1 |
| 2013 | 0.004505 | 0.006394 | 0.011345 | 0.018625 | 0.031601 | 0.052096 | 0.088886 | 0.145896 | 0.245474 | 0.394961 | 1 |
| 2014 | 0.004450 | 0.006317 | 0.011061 | 0.018421 | 0.030925 | 0.051291 | 0.087941 | 0.144258 | 0.242014 | 0.389196 | 1 |
| 2015 | 0.004389 | 0.006249 | 0.010973 | 0.018040 | 0.030271 | 0.050445 | 0.086935 | 0.142796 | 0.238688 | 0.384069 | 1 |
| 2016 | 0.004329 | 0.006197 | 0.010898 | 0.017715 | 0.029693 | 0.049591 | 0.085919 | 0.141451 | 0.235547 | 0.378451 | 1 |
| 2017 | 0.004365 | 0.006285 | 0.011072 | 0.017778 | 0.029810 | 0.049639 | 0.086349 | 0.142277 | 0.235528 | 0.376407 | 1 |
| 2018 | 0.004170 | 0.006050 | 0.010665 | 0.016969 | 0.028628 | 0.047460 | 0.083286 | 0.138055 | 0.228859 | 0.365922 | 1 |

|      |          |          |          |          |          |          |          |          |          |          |   |
|------|----------|----------|----------|----------|----------|----------|----------|----------|----------|----------|---|
| 2019 | 0.004085 | 0.005984 | 0.010552 | 0.016581 | 0.028366 | 0.046557 | 0.082216 | 0.137041 | 0.227301 | 0.363110 | 1 |
| 2020 | 0.004019 | 0.005957 | 0.010533 | 0.016595 | 0.028164 | 0.046502 | 0.082567 | 0.137366 | 0.226793 | 0.361067 | 1 |
| 2021 | 0.003906 | 0.005869 | 0.010440 | 0.016598 | 0.028160 | 0.046617 | 0.082413 | 0.137320 | 0.226379 | 0.359748 | 1 |
| 2022 | 0.003859 | 0.005637 | 0.009943 | 0.015625 | 0.026589 | 0.044074 | 0.078578 | 0.132041 | 0.221023 | 0.358320 | 1 |
| 2023 | 0.003781 | 0.005526 | 0.009737 | 0.015321 | 0.026038 | 0.043295 | 0.077384 | 0.130525 | 0.218988 | 0.356128 | 1 |
| 2024 | 0.003704 | 0.005414 | 0.009530 | 0.015015 | 0.025514 | 0.042491 | 0.076203 | 0.129013 | 0.216969 | 0.353872 | 1 |
| 2025 | 0.003628 | 0.005304 | 0.009328 | 0.014714 | 0.025020 | 0.041698 | 0.075045 | 0.127523 | 0.214935 | 0.351654 | 1 |
| 2026 | 0.003553 | 0.005197 | 0.009130 | 0.014416 | 0.024543 | 0.040912 | 0.073888 | 0.125983 | 0.212843 | 0.349202 | 1 |
| 2027 | 0.003479 | 0.005091 | 0.008935 | 0.014120 | 0.024075 | 0.040132 | 0.072769 | 0.124436 | 0.210948 | 0.346991 | 1 |
| 2028 | 0.003408 | 0.004989 | 0.008747 | 0.013835 | 0.023629 | 0.039401 | 0.071684 | 0.122940 | 0.209204 | 0.344937 | 1 |
| 2029 | 0.003336 | 0.004887 | 0.008560 | 0.013550 | 0.023183 | 0.038704 | 0.070573 | 0.121468 | 0.207449 | 0.342884 | 1 |
| 2030 | 0.003265 | 0.004785 | 0.008373 | 0.013264 | 0.022729 | 0.038015 | 0.069408 | 0.119895 | 0.205471 | 0.340438 | 1 |
| 2031 | 0.003196 | 0.004687 | 0.008195 | 0.012992 | 0.022293 | 0.037372 | 0.068300 | 0.118409 | 0.203594 | 0.338283 | 1 |
| 2032 | 0.003127 | 0.004587 | 0.008015 | 0.012716 | 0.021850 | 0.036722 | 0.067175 | 0.116925 | 0.201623 | 0.336221 | 1 |
| 2033 | 0.003059 | 0.004489 | 0.007839 | 0.012446 | 0.021416 | 0.036088 | 0.066088 | 0.115419 | 0.199593 | 0.334066 | 1 |
| 2034 | 0.002993 | 0.004395 | 0.007669 | 0.012185 | 0.020991 | 0.035464 | 0.065056 | 0.113883 | 0.197613 | 0.331968 | 1 |
| 2035 | 0.002928 | 0.004301 | 0.007499 | 0.011927 | 0.020572 | 0.034848 | 0.064077 | 0.112382 | 0.195712 | 0.329951 | 1 |
| 2036 | 0.002864 | 0.004207 | 0.007331 | 0.011671 | 0.020158 | 0.034229 | 0.063112 | 0.110872 | 0.193783 | 0.327828 | 1 |
| 2037 | 0.002802 | 0.004117 | 0.007168 | 0.011425 | 0.019756 | 0.033626 | 0.062170 | 0.109368 | 0.191861 | 0.325479 | 1 |
| 2038 | 0.002742 | 0.004028 | 0.007008 | 0.011184 | 0.019365 | 0.033036 | 0.061262 | 0.107960 | 0.190036 | 0.323428 | 1 |
| 2039 | 0.002682 | 0.003941 | 0.006852 | 0.010947 | 0.018980 | 0.032452 | 0.060353 | 0.106585 | 0.188053 | 0.321185 | 1 |
| 2040 | 0.002624 | 0.003856 | 0.006698 | 0.010714 | 0.018601 | 0.031877 | 0.059454 | 0.105282 | 0.186125 | 0.319113 | 1 |
| 2041 | 0.002568 | 0.003774 | 0.006547 | 0.010483 | 0.018225 | 0.031298 | 0.058526 | 0.103934 | 0.184058 | 0.316738 | 1 |
| 2042 | 0.002514 | 0.003693 | 0.006400 | 0.010258 | 0.017857 | 0.030731 | 0.057611 | 0.102609 | 0.182023 | 0.314443 | 1 |
| 2043 | 0.002462 | 0.003617 | 0.006260 | 0.010043 | 0.017507 | 0.030186 | 0.056724 | 0.101317 | 0.180060 | 0.312080 | 1 |
| 2044 | 0.002409 | 0.003541 | 0.006120 | 0.009828 | 0.017155 | 0.029643 | 0.055843 | 0.100051 | 0.178260 | 0.309823 | 1 |
| 2045 | 0.002359 | 0.003467 | 0.005985 | 0.009620 | 0.016815 | 0.029113 | 0.054972 | 0.098761 | 0.176420 | 0.307267 | 1 |
| 2046 | 0.002309 | 0.003395 | 0.005852 | 0.009413 | 0.016471 | 0.028578 | 0.054088 | 0.097445 | 0.174591 | 0.304770 | 1 |
| 2047 | 0.002265 | 0.003330 | 0.005732 | 0.009225 | 0.016161 | 0.028096 | 0.053287 | 0.096246 | 0.172931 | 0.302499 | 1 |
| 2048 | 0.002220 | 0.003266 | 0.005616 | 0.009042 | 0.015857 | 0.027618 | 0.052481 | 0.095008 | 0.171168 | 0.300080 | 1 |
| 2049 | 0.002177 | 0.003204 | 0.005501 | 0.008862 | 0.015557 | 0.027148 | 0.051689 | 0.093788 | 0.169421 | 0.297758 | 1 |
| 2050 | 0.002133 | 0.003142 | 0.005390 | 0.008688 | 0.015264 | 0.026684 | 0.050903 | 0.092558 | 0.167617 | 0.295409 | 1 |

Source: Adapted from United Nations Population Estimates (2022), Tables  
 “WPP2022\_Life\_Table\_Abridged\_Medium\_1950-2021.csv” and  
 “WPP2022\_Life\_Table\_Abridged\_Medium\_2022-2100.csv”.  
<https://population.un.org/wpp/Download/Standard/CSV/>



Figure S1

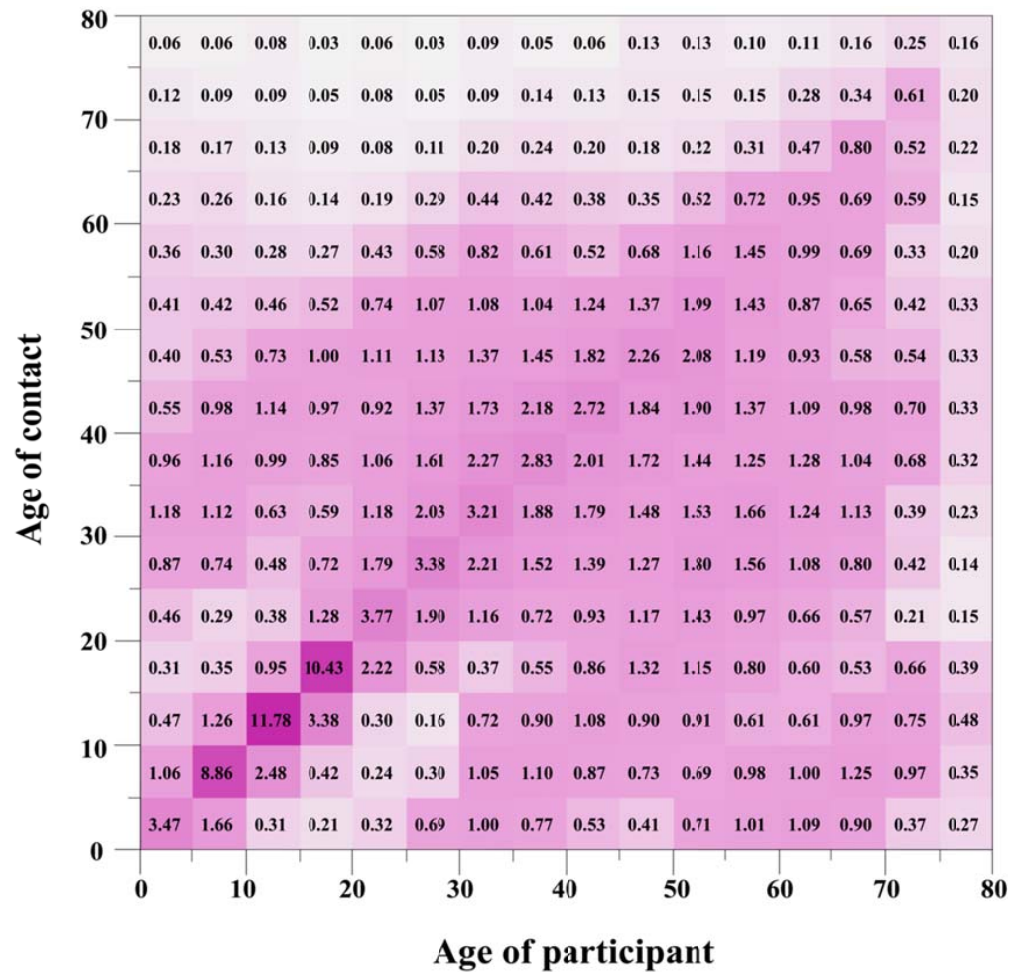

**Figure S1.** Daily number of respiratory contacts by age group in China.

Source: Adapted from the projected contact matrix reported by Prem K (2021),<sup>7</sup> which was based on three studies in Guangdong,<sup>4</sup> Hong Kong<sup>5</sup> and Shanghai<sup>6</sup> China respectively.

**Table S6.** Case detection rate (CDR) and treatment success rate (TSR) for tuberculosis in China.

| Year | CDR (%)<br>WHO estimates <sup>a</sup> | TSR (%)<br>WHO estimates <sup>b</sup> | Year | CDR (%)<br>smoothed <sup>c</sup> | Year | CDR (%)<br>smoothed <sup>c</sup> |
|------|---------------------------------------|---------------------------------------|------|----------------------------------|------|----------------------------------|
| 1990 | 21                                    | NA                                    | 1990 | 39                               | 2022 | 77                               |
| 1991 | 20                                    | NA                                    | 1991 | 41                               | 2023 | 78                               |
| 1992 | 19                                    | NA                                    | 1992 | 42                               | 2024 | 79                               |
| 1993 | 21                                    | NA                                    | 1993 | 43                               | 2025 | 79                               |
| 1994 | 22                                    | 91                                    | 1994 | 45                               | 2026 | 80                               |
| 1995 | 32                                    | 93                                    | 1995 | 46                               | 2027 | 80                               |
| 1996 | 32                                    | 94                                    | 1996 | 48                               | 2028 | 81                               |
| 1997 | 31                                    | 95                                    | 1997 | 49                               | 2029 | 81                               |
| 1998 | 30                                    | 95                                    | 1998 | 51                               | 2030 | 82                               |
| 1999 | 31                                    | 95                                    | 1999 | 52                               | 2031 | 82                               |
| 2000 | 33                                    | 93                                    | 2000 | 54                               | 2032 | 83                               |
| 2001 | 36                                    | 95                                    | 2001 | 55                               | 2033 | 83                               |
| 2002 | 36                                    | 92                                    | 2002 | 56                               | 2034 | 83                               |
| 2003 | 49                                    | 93                                    | 2003 | 58                               | 2035 | 84                               |
| 2004 | 66                                    | 92                                    | 2004 | 59                               | 2036 | 84                               |
| 2005 | 76                                    | 92                                    | 2005 | 61                               | 2037 | 84                               |
| 2006 | 82                                    | 92                                    | 2006 | 62                               | 2038 | 85                               |
| 2007 | 87                                    | 93                                    | 2007 | 63                               | 2039 | 85                               |
| 2008 | 89                                    | 93                                    | 2008 | 64                               | 2040 | 85                               |
| 2009 | 89                                    | 94                                    | 2009 | 65                               | 2041 | 85                               |
| 2010 | 89                                    | 95                                    | 2010 | 67                               | 2042 | 86                               |
| 2011 | 89                                    | 95                                    | 2011 | 68                               | 2043 | 86                               |
| 2012 | 89                                    | 95                                    | 2012 | 69                               | 2044 | 86                               |
| 2013 | 89                                    | 95                                    | 2013 | 70                               | 2045 | 86                               |
| 2014 | 88                                    | 94                                    | 2014 | 71                               | 2046 | 86                               |
| 2015 | 88                                    | 94                                    | 2015 | 72                               | 2047 | 86                               |
| 2016 | 88                                    | 93                                    | 2016 | 73                               | 2048 | 87                               |
| 2017 | 88                                    | 93                                    | 2017 | 74                               | 2049 | 87                               |
| 2018 | 92                                    | 94                                    | 2018 | 74                               | 2050 | 87                               |
| 2019 | 88                                    | 94                                    | 2019 | 75                               |      |                                  |
| 2020 | 77                                    | 95                                    | 2020 | 76                               |      |                                  |
| 2021 | 75                                    | NA                                    | 2021 | 77                               |      |                                  |

<sup>a,b</sup>Adapted from WHO Tuberculosis Data (2022). Tables “TB\_burden\_countries\_2022-12-01.csv” and “TB\_outcomes\_2022-12-01.csv”.

<https://www.who.int/teams/global-tuberculosis-programme/data>

<sup>c</sup>The generalized logistic function was fitted for CDR data to remove artificial noise in the data and derived a smoothed curve over 2000-50. Adapted from Harris RC (2020),<sup>28</sup> supplementary materials Figure 4.

#### 4. Model calibration and status quo projection

**Table S7.** Procedure for model calibration.

| <b>Element</b>               | <b>Specifications</b>                                                                                                                                                                                                                                                                                                                                             |
|------------------------------|-------------------------------------------------------------------------------------------------------------------------------------------------------------------------------------------------------------------------------------------------------------------------------------------------------------------------------------------------------------------|
| Calibration targets          | Demographic targets (see <a href="#">Table S8</a> ).<br>Epidemiological targets (see <a href="#">Table S9</a> ).                                                                                                                                                                                                                                                  |
| Goodness of fit (GoF) metric | GoF metric served as the objective function for measuring the accuracy of the model's predictions vs. the targets. Mean percentage deviation, not weighted.                                                                                                                                                                                                       |
| Nelder-Mead search algorithm | We used Latin hypercube sampling to draw multiple (e.g. 1000) sets of parameter values from their predefined distributions as the simplexes. With each simplex seeded, the Nelder-Mead search algorithm (using R package “dfoptim” <sup>29</sup> ) was applied to produce 1 optimal set of input parameter values which locally minimized the overall GoF metric. |
| Acceptance criteria          | For the input parameter values, only the calibrated parameter sets which best minimize GoF were deemed as acceptable, as we described elsewhere. <sup>30</sup>                                                                                                                                                                                                    |
| Stopping rule                | We repeated the same calibration step 1000 times with each simplex seeded and derived 100 best fitting parameter subsets.                                                                                                                                                                                                                                         |

**Table S8.** Demographic calibration targets.

| Age (yr)<br>Year | Population (thousands) estimated by UN |         |         |         |         |
|------------------|----------------------------------------|---------|---------|---------|---------|
|                  | All                                    | 0-14    | 15-54   | 55-64   | 65+     |
| <b>2000</b>      | 1 259 610                              | 313 187 | 776 177 | 84 322  | 85 924  |
| <b>2020</b>      | 1 423 998                              | 258 888 | 820 770 | 169 103 | 175 237 |
| <b>2035</b>      | 1 401 489                              | 154 898 | 736 292 | 201 227 | 309 071 |
| <b>2050</b>      | 1 316 946                              | 150 752 | 562 468 | 210 920 | 392 806 |

Source: Adapted from “World Population Prospects 2022: Summary of Results”.<sup>31</sup>

Figure S2

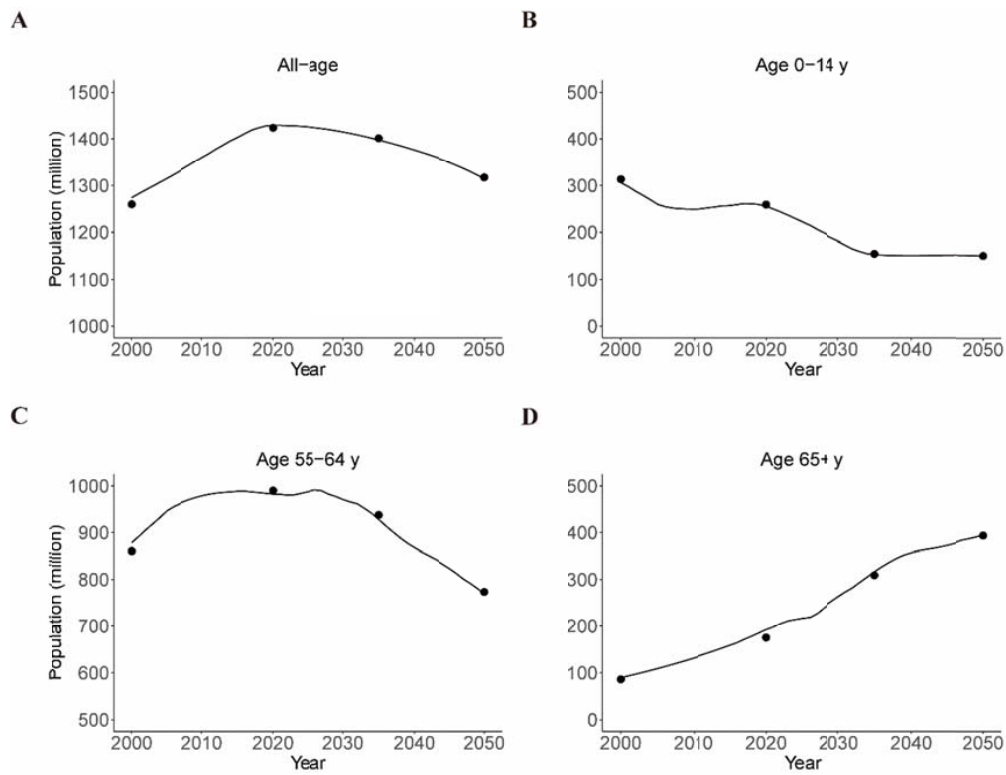

**Figure S2.** Model calibration and status quo projection of the population in China. (A) the overall population, (B) 0-14 years, (C) 15-64 years, (D)  $\geq 65$  years.

**Table S9.** Epidemiological calibration targets.

| Targets     | Microbiologically-positive pulmonary TB prevalence rate<br>(/100,000/yr) <sup>32</sup> |                   |                  |                   | TB incidence rate<br>(/100,000/yr) <sup>33</sup> | TB mortality rate<br>(/100,000/yr) <sup>34</sup> |                      |                      |                      |                      |                      |                      |
|-------------|----------------------------------------------------------------------------------------|-------------------|------------------|-------------------|--------------------------------------------------|--------------------------------------------------|----------------------|----------------------|----------------------|----------------------|----------------------|----------------------|
|             | Age (yr)<br>Year                                                                       | ≥15               | 15-44            | 45-59             | 60+                                              | All                                              | All                  | 0-14                 | 15-29                | 30-44                | 45-59                | 60+                  |
| <b>2000</b> |                                                                                        | 178<br>(163, 195) | 106<br>(91, 123) | 213<br>(174, 260) | 596<br>(510, 698)                                | /                                                | /                    | /                    | /                    | /                    | /                    | /                    |
| <b>2005</b> |                                                                                        | /                 | /                | /                 | /                                                | 96.9<br>(77.5, 116.3)                            | /                    | /                    | /                    | /                    | /                    | /                    |
| <b>2010</b> |                                                                                        | 116<br>(101, 132) | 67<br>(53, 84)   | 133<br>(106, 168) | 346<br>(294, 407)                                | 74.3<br>(59.4, 89.1)                             | 3.37<br>(3.25, 3.50) | 0.29<br>(0.21, 0.40) | 0.88<br>(0.75, 1.03) | 1.77<br>(1.59, 1.97) | 3.24<br>(2.97, 3.53) | 15.7<br>(14.9, 16.5) |
| <b>2014</b> |                                                                                        | /                 | /                | /                 | /                                                | 65.6<br>(52.5, 78.8)                             | /                    | /                    | /                    | /                    | /                    | /                    |
| <b>2018</b> |                                                                                        | /                 | /                | /                 | /                                                | 59.3<br>(47.4, 71.1)                             | /                    | /                    | /                    | /                    | /                    | /                    |

TB, tuberculosis.

Figure S3

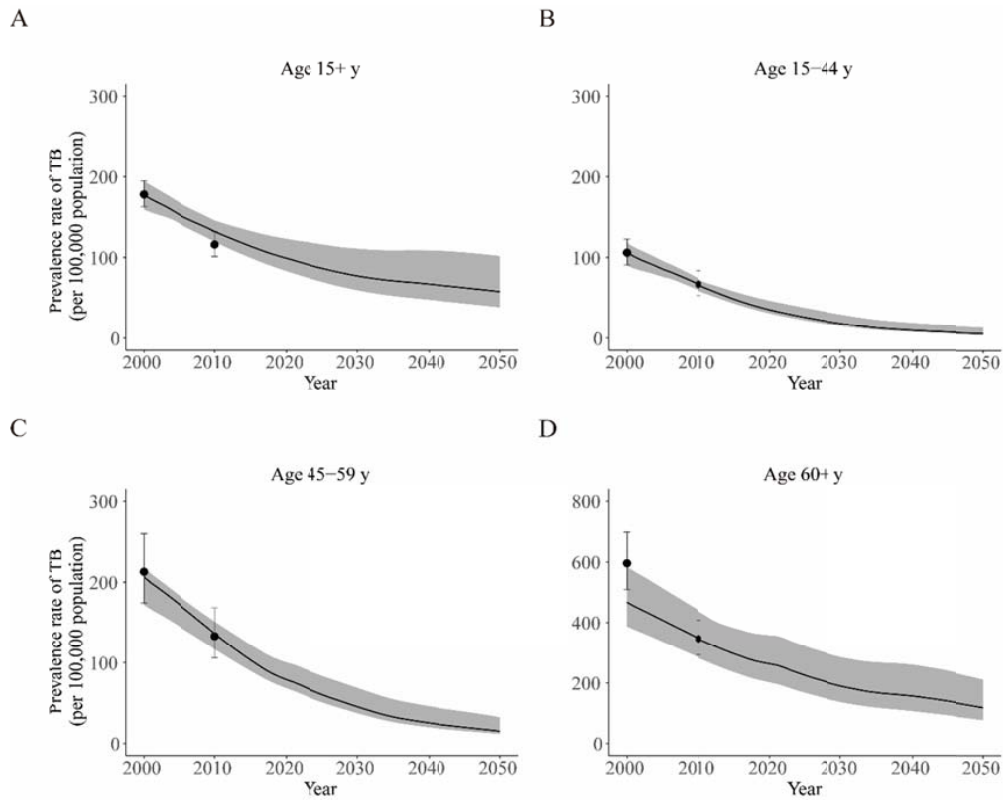

**Figure S3.** Model calibration and status quo projection of microbiologically-positive tuberculosis (TB) prevalence in China.

(A) the overall  $\geq 15$  years older population, (B) 15-44 years, (D) 44-59 years, (E)  $\geq 60$  years.

Data are presented as median and 95% CI.

**Figure S4**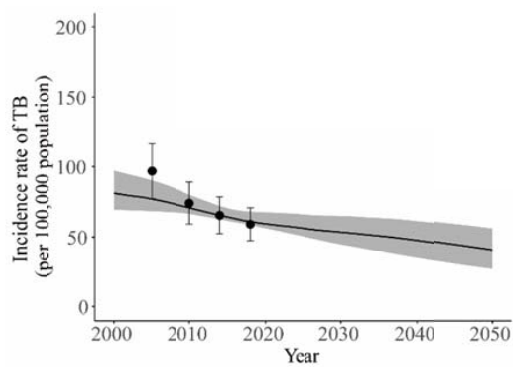

**Figure S4.** Model calibration and status quo projection of TB incidence in China. Data are presented as median and 95% CI.



Figure S5

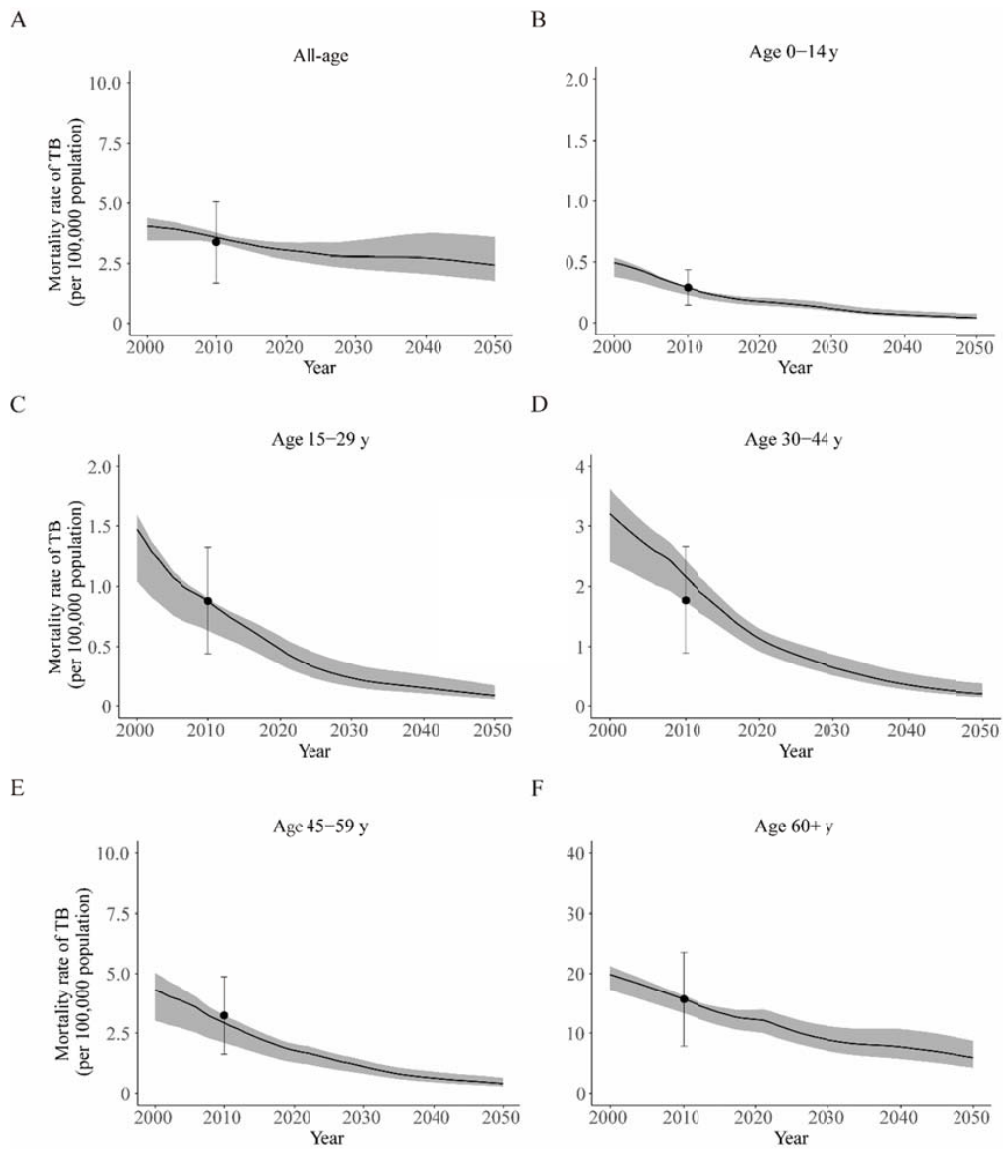

**Figure S5.** Model calibration and status quo projection of TB-related mortality in China. (A) the overall population, (B) 0–14 years, (C) 15–29 years, (D) 30–44 years, (E) 45–59 years, (F)  $\geq 60$  years. Data are presented as median and 95% CI.

**Figure S6**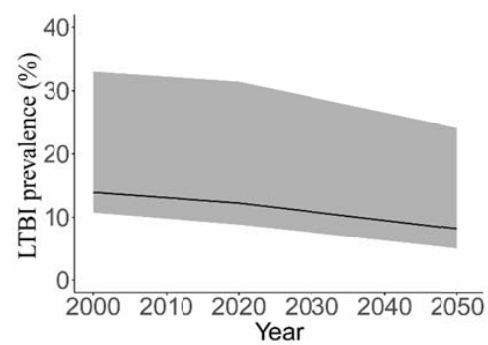**Figure S6.** Status quo projection of latent tuberculosis infection (LTBI) prevalence in China.

Data are presented as median and 95% CI.

Figure S7

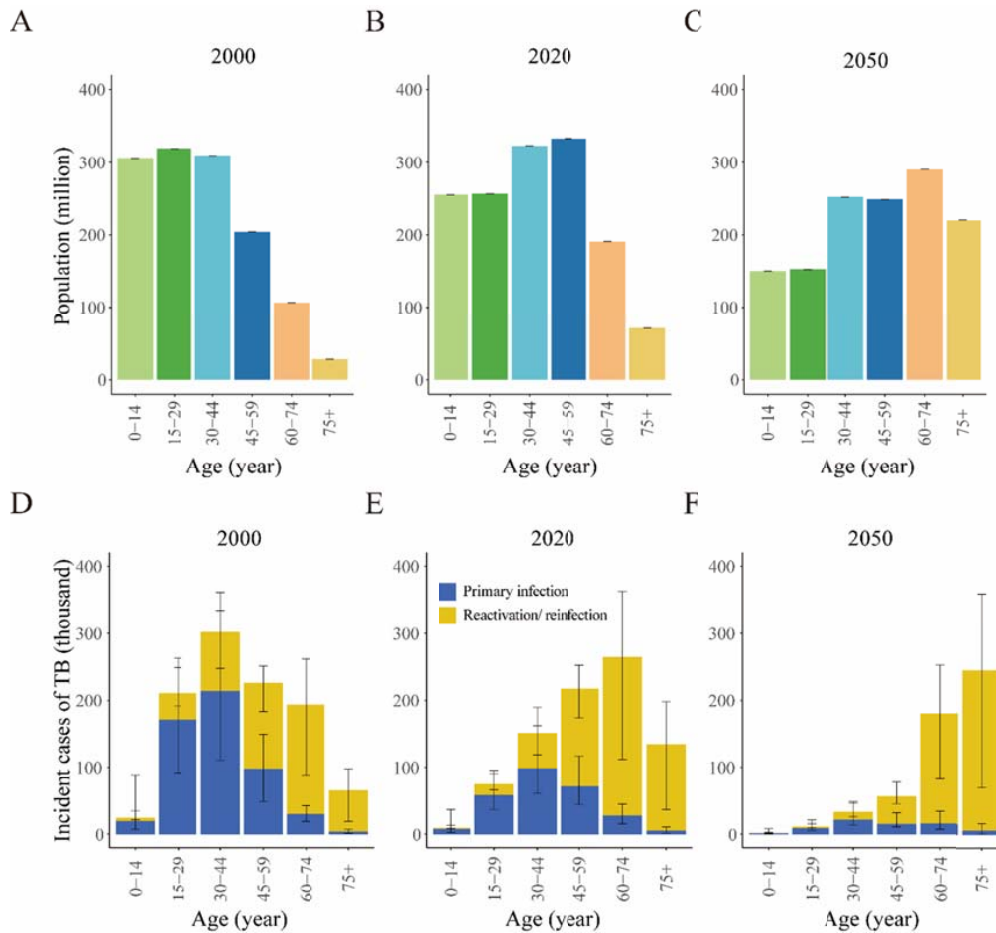

**Figure S7.** Estimated national population size and incident TB cases by age in China.

(A-C) Estimated China population size by age in 2000, 2020 and 2050. (D-F) Estimated incident cases of TB caused by primary infection or reactivation/reinfection in 2000, 2020 and 2050.

Data are presented as median and 95% CI.



**Table S11.** Predicted incidence rate and mortality rate reduction in 2050 for government-funded national *Vacciae* vaccination in China.

| Strategy                                       | Incidence rate<br>(per 10 <sup>5</sup> population) | IRR (%)           | Mortality rate<br>(per 10 <sup>5</sup> population) | MRR (%)           |
|------------------------------------------------|----------------------------------------------------|-------------------|----------------------------------------------------|-------------------|
| <b>No <i>Vacciae</i></b>                       | 39.96 (30.63, 54.08)                               | -                 | 2.43 (1.99, 3.37)                                  | -                 |
| <b><i>Vacciae</i> with 10-y protection</b>     |                                                    |                   |                                                    |                   |
| PSI, Older adult routine                       | 35.73 (27.11, 47.94)                               | 10.9 (9.7, 12.6)  | 2.16 (1.77, 2.95)                                  | 11.5 (10.3, 12.7) |
| P&PI, Older adult routine                      | 33.94 (24.74, 45.08)                               | 15.7 (13.5, 20.0) | 2.04 (1.69, 2.71)                                  | 16.6 (14.5, 20.2) |
| PSI, All age campaign                          | 28.85 (21.27, 38.30)                               | 28.3 (26.3, 31.7) | 1.77 (1.46, 2.43)                                  | 27.1 (25.5, 29.1) |
| P&PI, All age campaign                         | 22.86 (14.54, 31.25)                               | 42.8 (37.9, 53.9) | 1.47 (1.24, 1.94)                                  | 39.3 (36.7, 44.1) |
| <b><i>Vacciae</i> with 20-y protection</b>     |                                                    |                   |                                                    |                   |
| PSI, Older adult routine                       | 31.35 (24.16, 42.08)                               | 21.7 (19.9, 23.2) | 1.80 (1.47, 2.49)                                  | 26.3 (24.1, 27.6) |
| P&PI, Older adult routine                      | 28.11 (20.83, 37.22)                               | 30.3 (27.7, 33.2) | 1.55 (1.29, 2.08)                                  | 36.4 (33.5, 39.8) |
| PSI, All age campaign                          | 28.92 (21.36, 38.35)                               | 28.1 (26.1, 31.3) | 1.77 (1.45, 2.43)                                  | 27.3 (25.5, 29.1) |
| P&PI, All age campaign                         | 22.89 (14.62, 31.22)                               | 42.7 (37.8, 53.6) | 1.46 (1.23, 1.93)                                  | 39.9 (37.5, 44.5) |
| <b><i>Vacciae</i> with lifelong protection</b> |                                                    |                   |                                                    |                   |
| PSI, Older adult routine                       | 27.01 (21.40, 36.83)                               | 32.0 (28.2, 34.0) | 1.64 (1.35, 2.30)                                  | 32.6 (30.1, 34.2) |
| P&PI, Older adult routine                      | 22.34 (17.60, 30.30)                               | 44.0 (41.0, 45.7) | 1.35 (1.11, 1.84)                                  | 44.8 (42.2, 47.3) |
| PSI, All age campaign                          | 26.47 (20.71, 36.04)                               | 33.4 (30.9, 35.4) | 1.60 (1.31, 2.25)                                  | 34.0 (31.9, 35.5) |
| P&PI, All age campaign                         | 19.33 (13.44, 26.23)                               | 51.8 (49.2, 56.0) | 1.22 (1.00, 1.64)                                  | 49.9 (47.7, 52.9) |

PSI, postinfection vaccine efficacy; P&PI, both pre- and postinfection vaccine efficacy; IRR, incidence rate reduction; MRR, mortality rate reduction.

Data are presented as median and 95% CI.

**Table S12.** Predicted number needed to vaccinate (NNV) per case or death averted in China during 2024-2050.

| Strategy                                 | Cases averted<br>(thousand) | Deaths averted<br>(thousand) | NNV per case<br>averted | NNV per death<br>averted |
|------------------------------------------|-----------------------------|------------------------------|-------------------------|--------------------------|
| <b>Vaccines with 10-y protection</b>     |                             |                              |                         |                          |
| PSI, Older adult routine                 | 5300 (3971, 7928)           | 131 (109, 171)               | 20 (12, 43)             | 803 (622, 1468)          |
| P&PI, Older adult routine                | 7608 (5722, 11 287)         | 185 (154, 256)               | 91 (61, 121)            | 3729 (2703, 4500)        |
| PSI, All age campaign                    | 9208 (7032, 13 814)         | 206 (172, 267)               | 29 (18, 66)             | 1337 (1009, 2637)        |
| P&PI, All age campaign                   | 14 155 (11 081, 22 183)     | 302 (253, 407)               | 207 (132, 265)          | 9698 (7196, 11 555)      |
| <b>Vaccines with 20-y protection</b>     |                             |                              |                         |                          |
| PSI, Older adult routine                 | 8009 (5820, 11 756)         | 199 (166, 264)               | 13 (8, 29)              | 522 (399, 968)           |
| P&PI, Older adult routine                | 11 267 (8276, 16 536)       | 280 (233, 377)               | 61 (42, 84)             | 2469 (1833, 2968)        |
| PSI, All age campaign                    | 9737 (7398, 14 397)         | 220 (184, 283)               | 19 (11, 42)             | 823 (615, 1632)          |
| P&PI, All age campaign                   | 14 927 (11 652, 22 966)     | 323 (273, 431)               | 129 (84, 165)           | 5948 (4455, 7017)        |
| <b>Vaccines with lifelong protection</b> |                             |                              |                         |                          |
| PSI, Older adult routine                 | 8353 (6045, 12 229)         | 207 (172, 274)               | 13 (7, 28)              | 502 (383, 934)           |
| P&PI, Older adult routine                | 11 671 (8582, 17 173)       | 290 (241, 390)               | 59 (40, 81)             | 2380 (1772, 2866)        |
| PSI, All age campaign                    | 10 168 (7684, 14 889)       | 229 (192, 296)               | 11 (7, 25)              | 506 (382, 961)           |
| P&PI, All age campaign                   | 15 613 (12 073, 23 846)     | 337 (286, 448)               | 64 (42, 83)             | 2976 (2235, 3506)        |

PSI, postinfection vaccine efficacy; P&PI, both pre- and postinfection vaccine efficacy.

Data are presented as median and 95% CI.

## 6. Costs and cost-effectiveness analyses

**Table S13.** Unit cost parameters.

| Unit cost                                         | Value (US\$) | Range (US\$) | Source  | Government-funded |     | Self-paid |     |
|---------------------------------------------------|--------------|--------------|---------|-------------------|-----|-----------|-----|
|                                                   |              |              |         | HCS               | SOC | HCS       | SOC |
| <b>Direct costs</b>                               |              |              |         |                   |     |           |     |
| <b>Direct medical costs<sup>a</sup></b>           |              |              |         |                   |     |           |     |
| Direct medical costs, self-paid                   | 805.5        | 465.2-1145.8 | 35 36   | ✓                 | ✓   | ✓         | ✓   |
| Direct medical costs, covered by health insurance | 419.1        | 147.6-690.6  | 35 36   | ✓                 | ✓   | ✓         | ✓   |
| <b>Direct non-medical costs</b>                   |              |              |         |                   |     |           |     |
| Transportation cost                               | 55           | ±20%         | 37      | ✗                 | ✓   | NA        | ✓   |
| Accommodation and food                            | 46           | ±20%         | 37      | ✗                 | ✓   | NA        | ✓   |
| Nutrition cost                                    | 367          | ±20%         | 37      | ✗                 | ✓   | NA        | ✓   |
| <b>Indirect costs (productivity loss)</b>         |              |              |         |                   |     |           |     |
| Patient ≤19 years <sup>b</sup>                    | 12 458       | ±20%         | 38      | NA                | ✓   | NA        | ✓   |
| Patient 20-59 years <sup>c</sup>                  | 6229         | ±20%         | 38      | NA                | ✓   | NA        | ✓   |
| Caregiver                                         | 79.5         | ±20%         | 39      | NA                | ✓   | NA        | ✓   |
| Premature death ≤59 years <sup>d</sup>            | 12 458       | ±20%         | 38      | NA                | ✓   | NA        | ✓   |
| <b>Vaccination program costs</b>                  |              |              |         |                   |     |           |     |
| TST screening                                     | 3.08         | 2.3-4.3      | 40-42   | ✓                 | ✓   | ✓         | ✓   |
| Vaccine cost, paid by patient                     | 372          |              |         | NA                | NA  | ✓         | ✓   |
| Vaccine cost, paid by government                  | 180          |              |         | ✓                 | ✓   | NA        | NA  |
| Wastage                                           | 15%          | 12%-18%      | Assumed | ✓                 | ✓   | NA        | NA  |
| Buffer stock                                      | 5%           | 4%-6%        | Assumed | ✓                 | ✓   | NA        | NA  |
| Administrative cost <sup>e</sup>                  | 19.08        | ±20%         | 43      | ✓                 | ✓   | NA        | NA  |
| Delivery cost <sup>f</sup>                        | 2.32         | 1.60-2.80    | 44      | ✓                 | ✓   | NA        | NA  |
| Vaccine campaign cost <sup>g</sup>                | 1.55         | ±20%         | 45      | ✓                 | ✓   | NA        | NA  |

Note: Costs are converted to U.S. dollars at the average exchange rate of 1:6.5 in 2021.

HCS, healthcare sector perspective; SOC, societal perspective; TST, tuberculin skin test.

<sup>a</sup>Medical costs of TB diagnosis and treatment, including outpatient and inpatient expenses. Among new cases of tuberculosis, 5.7% patients have multidrug-resistant (MDR) tuberculosis.<sup>36</sup>

<sup>b</sup>Patients younger than 20 years would start working one year late because of their TB-related long-term sick leave. It would lead to productivity losses based on per capita GDP for one year.

<sup>c</sup>Patients older than 20 years would return to work from six months' TB-related sick leave. It would lead to productivity losses based on per capita GDP for a half year.

<sup>d</sup>Lifelong productivity loss due to premature death was calculated by per capita GDP × working years.

<sup>e</sup>Including total cost of administration, regular maintenance, low-value consumables and materials, immunization digital system maintenance.

<sup>f</sup>Assumed delivery costs per person immunised to be the same in mass campaign or routine settings.

<sup>g</sup>Variable cost per vaccinated individual through mass campaigns.

**Table S14.** Estimated Chinese life expectancy during 2024-50.

| Year | Age     |         |         |         |         |         |         |         |         |         |         |
|------|---------|---------|---------|---------|---------|---------|---------|---------|---------|---------|---------|
|      | 0       | 1-4     | 5-9     | 10-14   | 15-19   | 20-24   | 25-29-  | 30-34   | 35-39   | 40-44   | 45-49   |
| 2024 | 78.9932 | 78.4306 | 74.5206 | 69.6048 | 64.6999 | 59.8128 | 54.9634 | 50.1392 | 45.3161 | 40.5043 | 35.7734 |
| 2025 | 79.1949 | 78.6196 | 74.7069 | 69.7886 | 64.8810 | 59.9911 | 55.1383 | 50.3104 | 45.4840 | 40.6690 | 35.9337 |
| 2026 | 79.3961 | 78.8087 | 74.8935 | 69.9728 | 65.0625 | 60.1700 | 55.3139 | 50.4824 | 45.6527 | 40.8345 | 36.0949 |
| 2027 | 79.5962 | 78.9968 | 75.0792 | 70.1561 | 65.2432 | 60.3479 | 55.4886 | 50.6536 | 45.8205 | 40.9992 | 36.2552 |
| 2028 | 79.7894 | 79.1786 | 75.2586 | 70.3333 | 65.4179 | 60.5200 | 55.6576 | 50.8190 | 45.9828 | 41.1585 | 36.4102 |
| 2029 | 79.9842 | 79.3619 | 75.4396 | 70.5120 | 65.5941 | 60.6936 | 55.8280 | 50.9859 | 46.1465 | 41.3191 | 36.5666 |
| 2030 | 80.1834 | 79.5504 | 75.6258 | 70.6961 | 65.7757 | 60.8727 | 56.0040 | 51.1584 | 46.3157 | 41.4852 | 36.7285 |
| 2031 | 80.3747 | 79.7316 | 75.8049 | 70.8731 | 65.9504 | 61.0450 | 56.1733 | 51.3243 | 46.4786 | 41.6451 | 36.8843 |
| 2032 | 80.5704 | 79.9172 | 75.9884 | 71.0545 | 66.1294 | 61.2216 | 56.3468 | 51.4945 | 46.6455 | 41.8090 | 37.0441 |
| 2033 | 80.7636 | 80.1009 | 76.1701 | 71.2343 | 66.3070 | 61.3968 | 56.5190 | 51.6634 | 46.8113 | 41.9718 | 37.2028 |
| 2034 | 80.9540 | 80.2823 | 76.3496 | 71.4119 | 66.4825 | 61.5700 | 56.6893 | 51.8304 | 46.9754 | 42.1329 | 37.3598 |
| 2035 | 81.1433 | 80.4625 | 76.5279 | 71.5884 | 66.6568 | 61.7420 | 56.8586 | 51.9964 | 47.1383 | 42.2929 | 37.5159 |
| 2036 | 81.3332 | 80.6437 | 76.7073 | 71.7660 | 66.8323 | 61.9153 | 57.0290 | 52.1637 | 47.3026 | 42.4543 | 37.6732 |
| 2037 | 81.5198 | 80.8223 | 76.8842 | 71.9412 | 67.0055 | 62.0863 | 57.1973 | 52.3289 | 47.4649 | 42.6137 | 37.8287 |
| 2038 | 81.7027 | 80.9972 | 77.0574 | 72.1127 | 67.1751 | 62.2539 | 57.3622 | 52.4907 | 47.6238 | 42.7698 | 37.9809 |
| 2039 | 81.8853 | 81.1722 | 77.2309 | 72.2846 | 67.3451 | 62.4219 | 57.5276 | 52.6532 | 47.7834 | 42.9266 | 38.1339 |
| 2040 | 82.0665 | 81.3460 | 77.4030 | 72.4552 | 67.5139 | 62.5887 | 57.6918 | 52.8145 | 47.9420 | 43.0823 | 38.2858 |
| 2041 | 82.2462 | 81.5205 | 77.5762 | 72.6269 | 67.6840 | 62.7569 | 57.8577 | 52.9775 | 48.1024 | 43.2401 | 38.4399 |
| 2042 | 82.4254 | 81.6935 | 77.7479 | 72.7973 | 67.8527 | 62.9238 | 58.0223 | 53.1394 | 48.2617 | 43.3968 | 38.5930 |
| 2043 | 82.5988 | 81.8612 | 77.9142 | 72.9623 | 68.0162 | 63.0857 | 58.1819 | 53.2965 | 48.4163 | 43.5489 | 38.7416 |
| 2044 | 82.7735 | 82.0299 | 78.0817 | 73.1285 | 68.1809 | 63.2486 | 58.3426 | 53.4546 | 48.5719 | 43.7020 | 38.8912 |
| 2045 | 82.9460 | 82.1969 | 78.2475 | 73.2930 | 68.3440 | 63.4101 | 58.5020 | 53.6115 | 48.7264 | 43.8541 | 39.0398 |
| 2046 | 83.1196 | 82.3653 | 78.4148 | 73.4591 | 68.5087 | 63.5732 | 58.6630 | 53.7702 | 48.8827 | 44.0081 | 39.1906 |
| 2047 | 83.2781 | 82.5193 | 78.5677 | 73.6110 | 68.6593 | 63.7224 | 58.8104 | 53.9154 | 49.0258 | 44.1490 | 39.3285 |
| 2048 | 83.4375 | 82.6744 | 78.7219 | 73.7641 | 68.8112 | 63.8730 | 58.9592 | 54.0620 | 49.1704 | 44.2915 | 39.4679 |
| 2049 | 83.5961 | 82.8287 | 78.8752 | 73.9165 | 68.9624 | 64.0228 | 59.1072 | 54.2079 | 49.3142 | 44.4332 | 39.6067 |
| 2050 | 83.7542 | 82.9828 | 79.0284 | 74.0686 | 69.1134 | 64.1725 | 59.2552 | 54.3539 | 49.4582 | 44.5751 | 39.7456 |

  

| Year | Age     |         |         |         |         |         |        |        |        |        |        |
|------|---------|---------|---------|---------|---------|---------|--------|--------|--------|--------|--------|
|      | 50-54   | 55-59   | 60-64   | 65-69   | 70-74   | 75-79   | 80-84  | 85-89  | 90-94  | 95-99  | 100    |
| 2024 | 31.1382 | 26.6707 | 22.3299 | 18.2895 | 14.5132 | 11.1370 | 8.1710 | 5.8222 | 4.0068 | 2.7111 | 2.0531 |
| 2025 | 31.2928 | 26.8171 | 22.4668 | 18.4122 | 14.6196 | 11.2239 | 8.2350 | 5.8653 | 4.0345 | 2.7262 | 2.0612 |
| 2026 | 31.4483 | 26.9644 | 22.6046 | 18.5358 | 14.7270 | 11.3125 | 8.3010 | 5.9105 | 4.0637 | 2.7431 | 2.0714 |
| 2027 | 31.6030 | 27.1109 | 22.7416 | 18.6587 | 14.8334 | 11.4002 | 8.3657 | 5.9548 | 4.0903 | 2.7584 | 2.0801 |
| 2028 | 31.7525 | 27.2526 | 22.8741 | 18.7774 | 14.9360 | 11.4847 | 8.4287 | 5.9975 | 4.1152 | 2.7729 | 2.0883 |
| 2029 | 31.9035 | 27.3955 | 23.0077 | 18.8972 | 15.0393 | 11.5694 | 8.4933 | 6.0403 | 4.1405 | 2.7875 | 2.0968 |
| 2030 | 32.0598 | 27.5438 | 23.1466 | 19.0220 | 15.1477 | 11.6589 | 8.5633 | 6.0877 | 4.1699 | 2.8051 | 2.107  |
| 2031 | 32.2103 | 27.6865 | 23.2801 | 19.1421 | 15.2519 | 11.7445 | 8.6306 | 6.1331 | 4.1978 | 2.8207 | 2.116  |
| 2032 | 32.3647 | 27.8328 | 23.4171 | 19.2654 | 15.3588 | 11.8321 | 8.6994 | 6.1794 | 4.2268 | 2.8359 | 2.1255 |
| 2033 | 32.5181 | 27.9784 | 23.5534 | 19.3881 | 15.4655 | 11.9197 | 8.7686 | 6.2273 | 4.2570 | 2.8520 | 2.1364 |
| 2034 | 32.6700 | 28.1226 | 23.6885 | 19.5099 | 15.5715 | 12.0068 | 8.8372 | 6.2761 | 4.2869 | 2.8678 | 2.1462 |



|      |         |         |         |         |         |         |        |        |        |        |        |
|------|---------|---------|---------|---------|---------|---------|--------|--------|--------|--------|--------|
| 2035 | 32.8209 | 28.2658 | 23.8226 | 19.6306 | 15.6763 | 12.0927 | 8.9042 | 6.3243 | 4.3159 | 2.8832 | 2.1555 |
| 2036 | 32.9731 | 28.4104 | 23.9580 | 19.7526 | 15.7825 | 12.1799 | 8.9721 | 6.3737 | 4.3460 | 2.8995 | 2.1648 |
| 2037 | 33.1235 | 28.5533 | 24.0920 | 19.8734 | 15.8879 | 12.2668 | 9.0401 | 6.4235 | 4.3768 | 2.9176 | 2.1751 |
| 2038 | 33.2708 | 28.6934 | 24.2232 | 19.9916 | 15.9908 | 12.3512 | 9.1055 | 6.4707 | 4.4059 | 2.9334 | 2.1831 |
| 2039 | 33.4188 | 28.8341 | 24.3552 | 20.1107 | 16.0948 | 12.4371 | 9.1724 | 6.5194 | 4.4381 | 2.9510 | 2.1931 |
| 2040 | 33.5658 | 28.9740 | 24.4864 | 20.2291 | 16.1981 | 12.5221 | 9.2384 | 6.5666 | 4.4696 | 2.9674 | 2.202  |
| 2041 | 33.7153 | 29.1167 | 24.6208 | 20.3510 | 16.3050 | 12.6110 | 9.3082 | 6.6171 | 4.5041 | 2.9865 | 2.213  |
| 2042 | 33.8637 | 29.2584 | 24.7543 | 20.4721 | 16.4113 | 12.6996 | 9.3778 | 6.6673 | 4.5382 | 3.0052 | 2.2241 |
| 2043 | 34.0079 | 29.3961 | 24.8842 | 20.5902 | 16.5153 | 12.7865 | 9.4465 | 6.7169 | 4.5719 | 3.0247 | 2.2354 |
| 2044 | 34.1529 | 29.5346 | 25.0148 | 20.7088 | 16.6194 | 12.8731 | 9.5143 | 6.7651 | 4.6035 | 3.0433 | 2.2447 |
| 2045 | 34.2971 | 29.6724 | 25.1449 | 20.8273 | 16.7241 | 12.9608 | 9.5839 | 6.8154 | 4.6372 | 3.0648 | 2.2564 |
| 2046 | 34.4435 | 29.8127 | 25.2777 | 20.9487 | 16.8313 | 13.0508 | 9.6553 | 6.8670 | 4.6710 | 3.0860 | 2.2678 |
| 2047 | 34.5775 | 29.9410 | 25.3992 | 21.0597 | 16.9296 | 13.1333 | 9.7209 | 6.9144 | 4.7020 | 3.1053 | 2.2782 |
| 2048 | 34.7130 | 30.0708 | 25.5222 | 21.1727 | 17.0301 | 13.2184 | 9.7893 | 6.9647 | 4.7354 | 3.1264 | 2.2907 |
| 2049 | 34.8479 | 30.2001 | 25.6449 | 21.2853 | 17.1304 | 13.3033 | 9.8575 | 7.0149 | 4.7689 | 3.1473 | 2.3047 |
| 2050 | 34.9830 | 30.3296 | 25.7679 | 21.3985 | 17.2315 | 13.3893 | 9.9271 | 7.0667 | 4.8038 | 3.1687 | 2.3194 |

Source: Adapted from UN World Population Prospects (2022). Table  
 “WPP2022\_MORT\_F07\_1\_ABRIDGED\_LIFE\_TABLE\_BOTH\_SEXE.csv”  
<https://population.un.org/wpp/Download/Standard/Mortality/>

**Table S15.** Cost-effectiveness for routine vaccination targeting different ages, with PSI vaccine conferring lifelong protection, from healthcare sector perspective.

| Outcome                       | Targeted age                        |                                 |                              |                             |
|-------------------------------|-------------------------------------|---------------------------------|------------------------------|-----------------------------|
|                               | 15-year-olds <sup>a</sup>           | 30-year-olds <sup>b</sup>       | 45-year-olds <sup>c</sup>    | 60-year-olds <sup>d</sup>   |
| DALY averted (million)        | 0.086<br>(0.047, 0.195)             | 0.457<br>(0.292, 0.766)         | 2.38<br>(1.99, 3.19)         | 3.91<br>(3.23, 5.17)        |
| CCA                           | 25 888<br>(9738, 53 911)            | 9194<br>(4805, 17 979)          | 2763<br>(1387, 6670)         | 1916<br>(851, 5066)         |
| CDA                           | 2 360 200<br>(1 421 450, 4 740 227) | 742 398<br>(496 862, 1 329 723) | 131 348<br>(84 513, 278 157) | 79 726<br>(46 048, 166 641) |
| ICER (vs. status quo)         | 46 036<br>(23 974, 96 327)          | 19 990<br>(12 129, 38 229)      | 6093<br>(3363, 13 574)       | 4234<br>(2097, 9833)        |
| ICER (vs. next best strategy) | 46 036<br>(23 974, 96 327)          | 19 990<br>(12 129, 38 229)      | 6093<br>(3363, 13 574)       | 1161<br>(-83, 3339)         |

PSI, postinfection vaccine efficacy; DALY, disability-adjusted life year; CCA, cost per case averted; CDA, cost per death averted; ICER, incremental cost-effectiveness ratio.

The government contact price of *Vaccae* was assumed to be US\$30 per dose. Coverage 90% and efficacy 54.7%.

<sup>a</sup>15-y populations each year and catch-up 16-29 y populations in 2024;

<sup>b</sup>30-y populations each year and catch-up 31-44 y populations in 2024;

<sup>c</sup>45-y populations each year and catch-up 46-59 y populations in 2024;

<sup>d</sup>60-y populations each year and catch-up 61-74 y populations in 2024.

Data are presented as median and 95% CI.

**Table S16.** Cost-effectiveness for routine vaccination targeting different ages, with PSI vaccine conferring lifelong protection, from societal perspective.

| Outcome                       | Targeted age                      |                                 |                             |                             |
|-------------------------------|-----------------------------------|---------------------------------|-----------------------------|-----------------------------|
|                               | 15-year-olds <sup>a</sup>         | 30-year-olds <sup>b</sup>       | 45-year-olds <sup>c</sup>   | 60-year-olds <sup>d</sup>   |
| DALY averted (million)        | 0.086<br>(0.047, 0.195)           | 0.457<br>(0.292, 0.766)         | 2.38<br>(1.99, 3.19)        | 3.91<br>(3.23, 5.17)        |
| CCA                           | 19 883<br>(4577, 47 897)          | 5462<br>(1151, 14 660)          | 1489<br>(180, 5254)         | 1288<br>(229, 4327)         |
| CDA                           | 1 805 691<br>(698 362, 4 224 289) | 441 869<br>(141 045, 1 059 995) | 68 675<br>(10 765, 215 593) | 50 796<br>(12 424, 142 094) |
| ICER (vs. status quo)         | 34 754<br>(11 541, 85 430)        | 12 158<br>(3009, 31 122)        | 3214<br>(429, 10 550)       | 2723<br>(563, 8321)         |
| ICER (vs. next best strategy) | 34 754<br>(11 541, 85 430)        | 12 158<br>(3009, 31 122)        | 1396<br>(-580, 5969)        | 1590<br>(-346, 5537)        |

PSI, postinfection vaccine efficacy; DALY, disability-adjusted life year; CCA, cost per case averted; CDA, cost per death averted; ICER, incremental cost-effectiveness ratio.

The government contact price of *Vaccae* was assumed to be US\$30 per dose. Coverage 90% and efficacy 54.7%

<sup>a</sup>15-y populations each year and catch-up 16-29 y populations in 2024;

<sup>b</sup>30-y populations each year and catch-up 31-44 y populations in 2024;

<sup>c</sup>45-y populations each year and catch-up 46-59 y populations in 2024;

<sup>d</sup>60-y populations each year and catch-up 61-74 y populations in 2024.

Data are presented as median and 95% CI.

**Table S17.** Predicted cost per case averted (CCA) and cost per death averted (CDA) for government-funded national *Vacciae* vaccination in China during 2024-50.

| Strategy                                | CCA (US\$ per case averted)   |                            | CDA (US\$ per death averted)        |                                     |
|-----------------------------------------|-------------------------------|----------------------------|-------------------------------------|-------------------------------------|
|                                         | Healthcare sector perspective | Societal perspective       | Healthcare sector perspective       | Societal perspective                |
| <b>Vacciae with 10-y protection</b>     |                               |                            |                                     |                                     |
| PSI, Older adult routine                | 3479<br>(1755, 8061)          | 2667<br>(1021, 7117)       | 141 384<br>(94 617, 273 569)        | 106 166<br>(53 018, 241 756)        |
| PSI, All age campaign                   | 5696<br>(3295, 12 866)        | 4434<br>(2028, 11 283)     | 261 169<br>(188 127, 511 966)       | 197 446<br>(117 846, 444 729)       |
| P&PI, Older adult routine               | 16 222<br>(10 667, 21 855)    | 15 400<br>(9653, 20 999)   | 666 674<br>(480 296, 807 299)       | 633 163<br>(435 756, 772 855)       |
| P&PI, All age campaign                  | 38 050<br>(23 987, 48 875)    | 36 352<br>(22 248, 47 165) | 1 786 306<br>(1 317 462, 2 127 316) | 1 701 795<br>(1 207 116, 2 040 491) |
| <b>Vacciae with 20-y protection</b>     |                               |                            |                                     |                                     |
| PSI, Older adult routine                | 2022<br>(915, 5279)           | 1376<br>(276, 4516)        | 83 733<br>(49 337, 173 388)         | 54 380<br>(14 948, 148 331)         |
| PSI, All age campaign                   | 3461<br>(1832, 8230)          | 2217<br>(640, 6738)        | 154 161<br>(104 098, 318 118)       | 95 101<br>(37 884, 256 750)         |
| P&PI, Older adult routine               | 10 729<br>(7067, 14 907)      | 10 063<br>(6371, 14 182)   | 431 977<br>(313 866, 528 122)       | 401 246<br>(279 512, 500 423)       |
| P&PI, All age campaign                  | 23 797<br>(15 180, 30 735)    | 22 319<br>(13 538, 29 044) | 1 101 463<br>(816 362, 1 301 968)   | 1 023 653<br>(730 065, 1 223 088)   |
| <b>Vacciae with lifelong protection</b> |                               |                            |                                     |                                     |
| PSI, Older adult routine                | 1916<br>(851, 5066)           | 1288<br>(229, 4327)        | 79 726<br>(46 048, 166 641)         | 50 796<br>(12 424, 142 094)         |
| PSI, All age campaign                   | 2300<br>(1112, 5693)          | 1085<br>(-13, 4251)        | 101 827<br>(63 003, 217 130)        | 46 613<br>(-873, 158 465)           |
| P&PI, Older adult routine               | 10 337<br>(6783, 14 356)      | 9678<br>(6103, 13 647)     | 415 691<br>(303 075, 509 108)       | 384 653<br>(268 598, 481 432)       |
| P&PI, All age campaign                  | 14 823<br>(9429, 19 414)      | 13 453<br>(7907, 17 783)   | 687 647<br>(503 337, 814 516)       | 611 575<br>(429 758, 742 504)       |

PSI, postinfection vaccine efficacy; P&amp;PI, both pre- and postinfection vaccine efficacy.

Data are presented as median and 95% CI.

**Table S18.** Cost-effectiveness for government-funded national *Vaccae* vaccination in China during 2024-50, from societal perspective.

| Strategy                                            | TB cases (million)   |                   | TB-related deaths (million) |                   | Cost (US\$ million)        | DALY (million)            |                                       |                                    |
|-----------------------------------------------------|----------------------|-------------------|-----------------------------|-------------------|----------------------------|---------------------------|---------------------------------------|------------------------------------|
| No <i>Vaccae</i> (status quo)                       | 45.59 (34.20, 74.18) |                   | 1.02 (0.87, 1.27)           |                   | 133 712 (98 857, 213 263)  | 24.50 (20.73, 32.56)      |                                       |                                    |
|                                                     | TB cases averted     |                   | TB-related deaths averted   |                   | Incremental cost           | DALY averted <sup>a</sup> | ICER (US\$ per DALY averted) relative |                                    |
|                                                     | n (million)          | %                 | n (million)                 | %                 | (US\$ million)             | (million)                 | to status quo                         | to next best strategy <sup>b</sup> |
| <b>Vaccae with 10-y protection</b>                  |                      |                   |                             |                   |                            |                           |                                       |                                    |
| PSI, Older adult (60-y routine + 61-74 y catch-up)  | 5.30 (3.97, 7.93)    | 11.7 (9.4, 12.9)  | 0.13 (0.11, 0.17)           | 13.0 (11.9, 14.0) | 13 847 (6983, 34 713)      | 2.79 (2.32, 3.67)         | 5006 (2206, 12 363)                   | 5007 (2208, 12 364)                |
| P&PI, Older adult (60-y routine + 61-74 y catch-up) | 7.61 (5.72, 11.29)   | 16.6 (14.0, 18.7) | 0.19 (0.15, 0.26)           | 18.3 (17.0, 20.7) | 117 395 (110 628, 120 194) | 4.01 (3.32, 5.41)         | 29 215 (20 684, 36 216)               | 88 875 (48 350, 114 634)           |
| PSI, All age (15-74 y, 10-yearly campaigns)         | 9.21 (7.03, 13.81)   | 20.1 (17.8, 21.4) | 0.21 (0.17, 0.27)           | 20.3 (19.0, 21.6) | 40 780 (23 942, 100 566)   | 4.46 (3.81, 5.96)         | 8844 (4580, 21 382)                   | 15 906 (8272, 34 828)              |
| P&PI, All age ((15-74 y, 10-yearly campaigns)       | 14.16 (11.08, 22.18) | 31.1 (29.2, 33.6) | 0.30 (0.25, 0.41)           | 30.0 (28.3, 32.5) | 512 655 (490 891, 522 187) | 7.05 (6.01, 9.63)         | 72 746 (51 390, 86 827)               | 113 745 (78 934, 142 254)          |
| <b>Vaccae with 20-y protection</b>                  |                      |                   |                             |                   |                            |                           |                                       |                                    |
| PSI, Older adult (60-y routine + 61-74 y catch-up)  | 8.01 (5.82, 11.76)   | 17.7 (13.4, 20.0) | 0.20 (0.17, 0.26)           | 20.0 (18.1, 21.6) | 10 986 (2920, 32 096)      | 3.83 (3.16, 5.04)         | 2867 (668, 8548)                      | 2868 (669, 8549)                   |
| PSI, All age (15-74 y, 20-yearly campaigns)         | 9.74 (7.40, 14.40)   | 21.2 (18.4, 22.6) | 0.22 (0.18, 0.28)           | 21.8 (20.2, 23.1) | 21 227 (8304, 62 093)      | 4.63 (3.91, 6.10)         | 4544 (1519, 12 823)                   | 13 742 (4838, 34 489)              |
| P&PI, Older adult (60-y routine + 61-74 y catch-up) | 11.27 (8.28, 16.54)  | 24.7 (19.9, 27.5) | 0.28 (0.23, 0.38)           | 27.8 (25.7, 30.3) | 112 940 (104 547, 117 279) | 5.42 (4.44, 7.05)         | 20 856 (14 578, 26 372)               | 67 563 (38 753, 85 517)            |
| P&PI, All age (15-74 y, 20-yearly campaigns)        | 14.93 (11.65, 22.97) | 32.7 (30.6, 35.1) | 0.32 (0.27, 0.43)           | 32.0 (30.4, 34.6) | 329 527 (308 761, 338 883) | 7.29 (6.22, 9.87)         | 45 505 (31 634, 54 248)               | 90 904 (59 682, 113 390)           |
| <b>Vaccae with lifelong protection</b>              |                      |                   |                             |                   |                            |                           |                                       |                                    |
| PSI, Older adult (60-y routine + 61-74 y catch-up)  | 8.35 (6.05, 12.23)   | 18.4 (13.9, 20.9) | 0.21 (0.17, 0.27)           | 20.8 (18.8, 22.5) | 10 676 (2523, 31 861)      | 3.91 (3.23, 5.17)         | 2723 (563, 8321)                      | 2724 (564, 8322)                   |
| PSI, All age (15-74 y, one campaign)                | 10.20 (7.68, 14.90)  | 22.0 (18.9, 23.6) | 0.23 (0.19, 0.30)           | 22.8 (21.1, 24.2) | 10 403 (-189, 40 783)      | 4.76 (3.99, 6.22)         | 2279 (-33, 8136)                      | 1192 (-3699, 10 102)               |
| P&PI, Older adult (60-y routine + 61-74 y catch-up) | 11.70 (8.58, 17.20)  | 25.7 (20.6, 28.6) | 0.29 (0.24, 0.39)           | 28.8 (26.6, 31.5) | 112 513 (103 948, 117 002) | 5.55 (4.53, 7.20)         | 20 272 (14 196, 25 752)               | 132 713 (66 360, 291 444)          |
| P&PI, All age (15-74 y, one campaign)               | 15.60 (12.1, 23.90)  | 33.9 (31.6, 36.5) | 0.34 (0.29, 0.45)           | 33.4 (31.7, 36.2) | 205 908 (185 311, 215 138) | 7.45 (6.34, 10.07)        | 27 897 (18 728, 33 644)               | 70 759 (43 035, 91 977)            |

<sup>a</sup>Strategies were in ascending order of effectiveness; <sup>b</sup> WTP was set at 1 × national pGDP (US\$12 458).

TB, tuberculosis. PSI, postinfection vaccine efficacy; P&PI, both pre- and postinfection vaccine efficacy; DALY, disability-adjusted life year.

ICER, incremental cost-effectiveness ratio, was calculated from societal perspective, with government contract price of US\$30/dose, and costs and effectiveness discounted with 3% per year.

Data are presented as median and 95% CI.

Figure S8

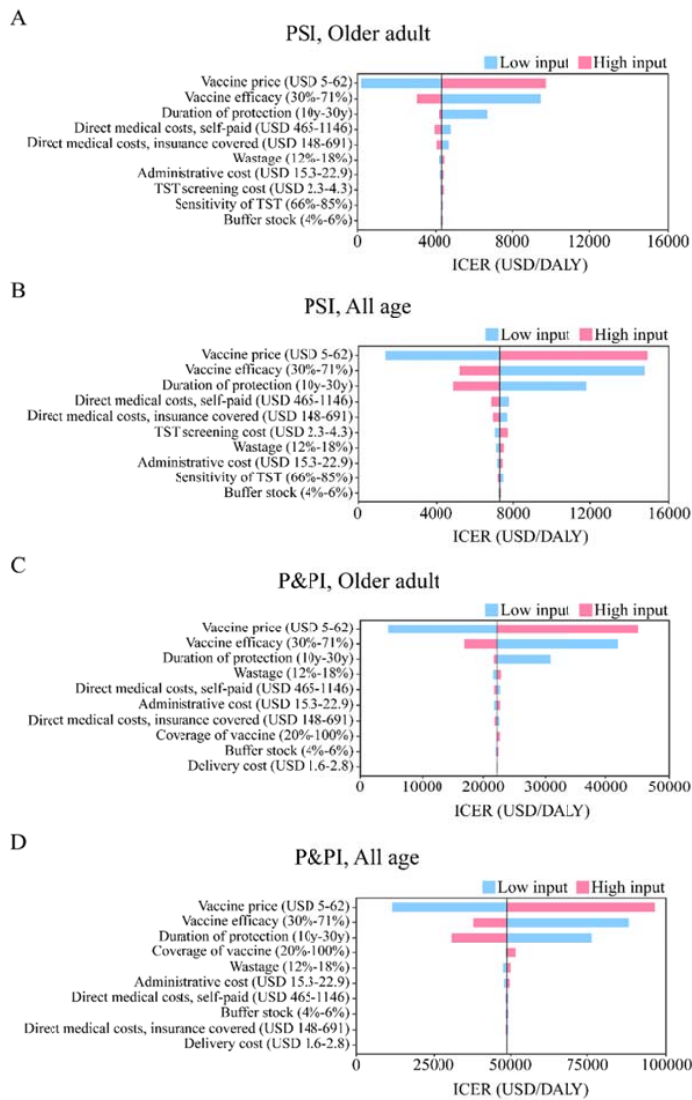

**Figure S8.** One-way sensitivity analyses compared with status quo, from healthcare sector perspective.

ICER, incremental cost effectiveness ratio; DALY, disability-adjusted life year.

Figure S9

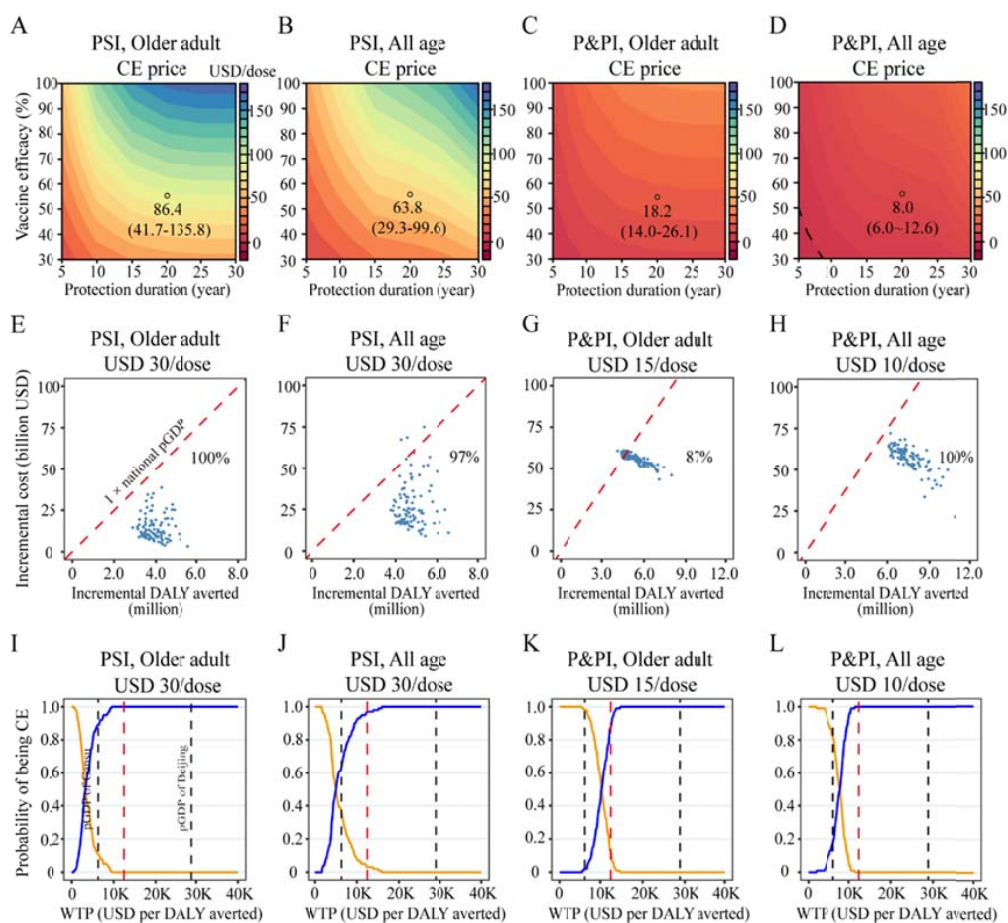

**Figure S9.** Cost-effectiveness analyses of Vaccae vaccination in China, from societal perspective.

(A-D) Contour plots showing the cost-effective vaccine prices that lead to the incremental cost per DALY averted equal to  $1 \times$  GDP per capita, for specified vaccine efficacy and protection duration settings. The values below the dashed black line (D) denote that no price would be cost-effective. (E-H) Cost-effectiveness planes for vaccination strategies. (I-L) cost-effectiveness acceptability curves. PSI, postinfection vaccine efficacy; P&PI, both pre- and postinfection vaccine efficacy. CE, cost-effective; DALY, disability-adjusted life year; WTP willingness to pay; P&PI, both pre- and postinfection; K, thousand.

**Figure S10**

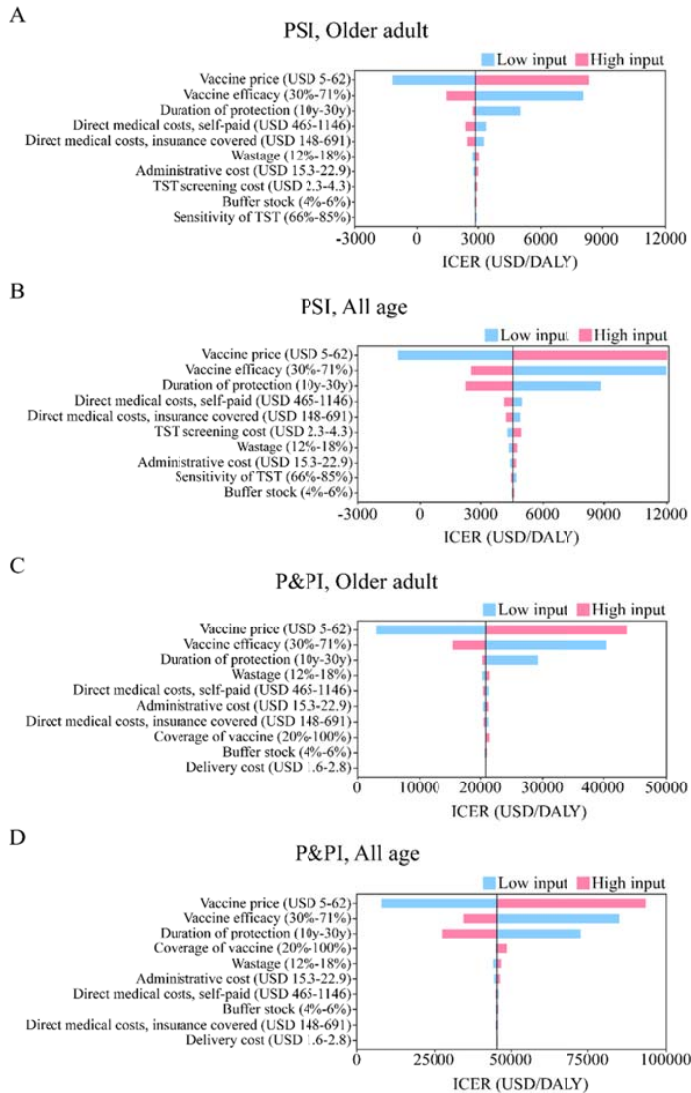

**Figure S10.** One-way sensitivity analyses compared with status quo, from societal perspective. ICER, incremental cost effectiveness ratio; DALY, disability-adjusted life year.



Figure S11

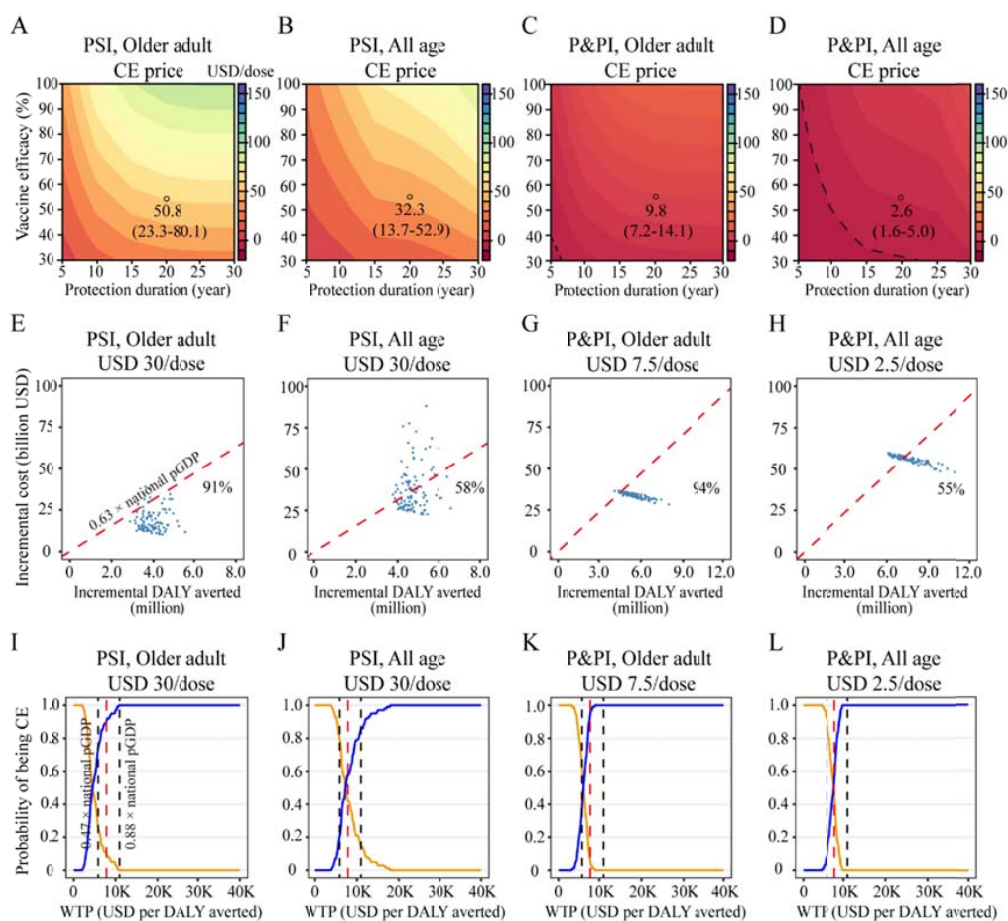

**Figure S11.** Cost-effectiveness analyses of Vaccae vaccination in China, from healthcare sector perspective (WTP=US\$7849).

(A-D) Contour plots showing the cost-effective vaccine prices that lead to the incremental cost per DALY averted equal to  $0.63 \times \text{GDP}$  per capita, for specified vaccine efficacy and protection duration settings. The values below the dashed black line (D) denote that no price would be cost-effective. (E-H) Cost-effectiveness planes for vaccination strategies. (I-L) cost-effectiveness acceptability curves. PSI, postinfection vaccine efficacy; P&PI, both pre- and postinfection vaccine efficacy. CE, cost-effective; DALY, disability-adjusted life year; WTP willingness to pay; P&PI, both pre- and postinfection; K, thousand.

Figure S12

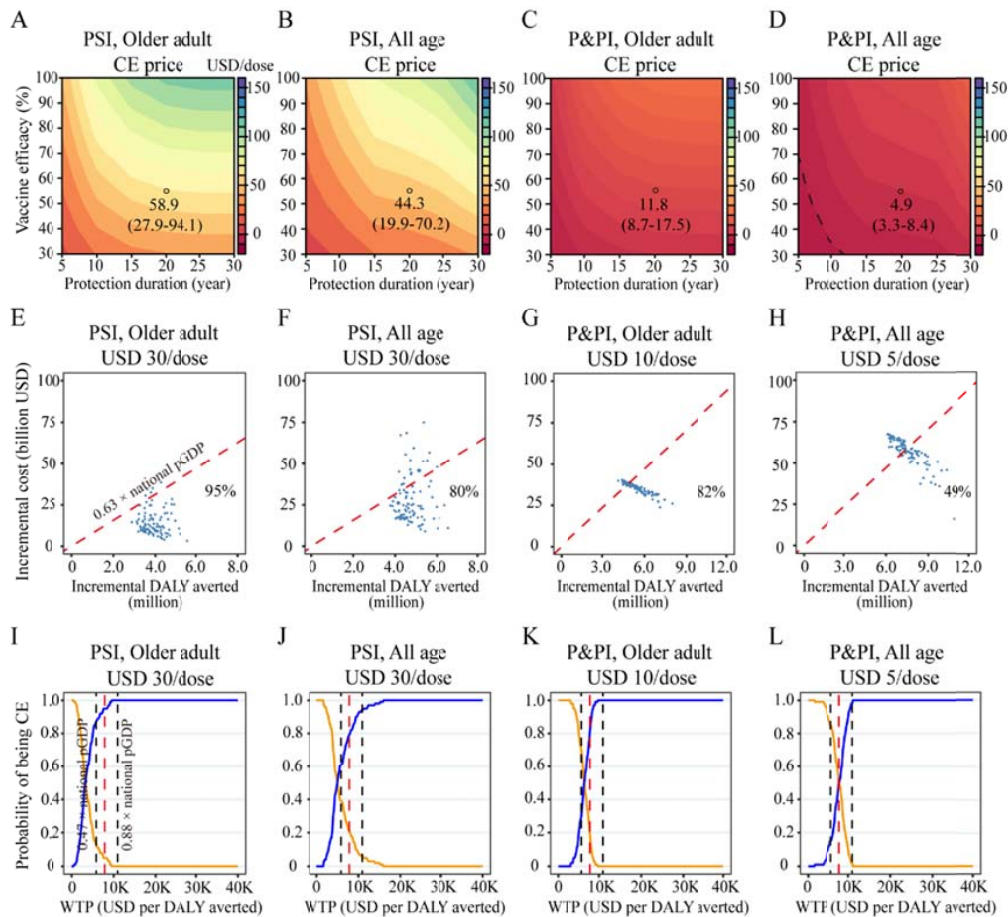

**Figure S12.** Cost-effectiveness analyses of Vaccae vaccination in China, from societal perspective (WTP=US\$7849).

(A-D) Contour plots showing the cost-effective vaccine prices that lead to the incremental cost per DALY averted equal to  $0.63 \times \text{GDP per capita}$ , for specified vaccine efficacy and protection duration settings. The values below the dashed black line (D) denote that no price would be cost-effective. (E-H) Cost-effectiveness planes for vaccination strategies. (I-L) cost-effectiveness acceptability curves. PSI, postinfection vaccine efficacy; P&PI, both pre- and postinfection vaccine efficacy. CE, cost-effective; DALY, disability-adjusted life year; WTP willingness to pay; P&PI, both pre- and postinfection; K, thousand.

**Table S19.** Cost-effectiveness for vaccination with *Vaccae* provided through private market during 2024-50, from healthcare sector perspective.

| Strategy                                            | TB cases (million)      |                | TB-related deaths (million) |                | Cost (US\$ million)        | DALY (million)            |                                       |                                    |
|-----------------------------------------------------|-------------------------|----------------|-----------------------------|----------------|----------------------------|---------------------------|---------------------------------------|------------------------------------|
| No <i>Vaccae</i> (status quo)                       | 45.587 (34.195, 74.175) |                | 1.016 (0.869, 1.273)        |                | 40 352 (30 942, 64 094)    | 24.50 (20.73, 32.56)      |                                       |                                    |
|                                                     | TB cases averted        |                | TB-related deaths averted   |                | Incremental cost           | DALY averted <sup>a</sup> | ICER (US\$ per DALY averted) relative |                                    |
|                                                     | n (million)             | %              | n (million)                 | %              | (US\$ million)             | (million)                 | to status quo                         | to next best strategy <sup>b</sup> |
| <b>Vaccae with 10-y protection</b>                  |                         |                |                             |                |                            |                           |                                       |                                    |
| PSI, Older adult (60-y routine + 61-74 y catch-up)  | 1.184 (0.884, 1.767)    | 2.6 (2.1, 2.9) | 0.029 (0.024, 0.038)        | 2.9 (2.6, 3.1) | 6562 (4630, 13 750)        | 0.62 (0.52, 0.82)         | 10 826 (6619, 22 011)                 | 10 826 (6619, 22 011)              |
| P&PI, Older adult (60-y routine + 61-74 y catch-up) | 1.741 (1.300, 2.568)    | 3.8 (3.2, 4.3) | 0.042 (0.035, 0.060)        | 4.2 (3.8, 4.8) | 42 933 (42 228, 43 320)    | 0.91 (0.75, 1.25)         | 47 172 (33 909, 57 520)               | 132 474 (71 007, 173 982)          |
| PSI, All age (15-74 y, 10-yearly campaigns)         | 2.056 (1.574, 3.077)    | 4.5 (4.0, 4.8) | 0.046 (0.038, 0.060)        | 4.5 (4.2, 4.9) | 18 166 (13 056, 38 752)    | 0.99 (0.85, 1.33)         | 18 116 (11 777, 37 267)               | 29 799 (20 083, 59 613)            |
| P&PI, All age ((15-74 y, 10-yearly campaigns)       | 3.350 (2.618, 5.259)    | 7.4 (6.8, 8.2) | 0.070 (0.059, 0.100)        | 7.0 (6.5, 7.8) | 184 233 (182 639, 184 868) | 1.68 (1.41, 2.32)         | 110 063 (78 982, 130 818)             | 165 285 (114 955, 206 126)         |
| <b>Vaccae with 20-y protection</b>                  |                         |                |                             |                |                            |                           |                                       |                                    |
| PSI, Older adult (60-y routine + 61-74 y catch-up)  | 1.791 (1.299, 2.620)    | 3.9 (3.0, 4.5) | 0.044 (0.037, 0.059)        | 4.4 (4.0, 4.8) | 6194 (4088, 13 398)        | 0.85 (0.70, 1.12)         | 7407 (4234, 16 015)                   | 7407 (4234, 16 015)                |
| PSI, All age (15-74 y, 20-yearly campaigns)         | 2.171 (1.650, 3.209)    | 4.7 (4.1, 5.0) | 0.049 (0.041, 0.063)        | 4.9 (4.5, 5.2) | 11 797 (8 200, 25 807)     | 1.03 (0.87, 1.36)         | 11 534 (7084, 24 422)                 | 31 483 (18 855, 62 172)            |
| P&PI, Older adult (60-y routine + 61-74 y catch-up) | 2.557 (1.881, 3.745)    | 5.6 (4.5, 6.4) | 0.063 (0.053, 0.087)        | 6.3 (5.8, 7.0) | 42 360 (41 403, 42 916)    | 1.23 (1.01, 1.64)         | 34 405 (25 402, 42 518)               | 101 586 (55 514, 129 075)          |
| P&PI, All age (15-74 y, 20-yearly campaigns)        | 3.487 (2.738, 5.414)    | 7.7 (7.2, 8.5) | 0.075 (0.063, 0.104)        | 7.4 (7.0, 8.3) | 121 992 (120 404, 122 620) | 1.72 (1.45, 2.36)         | 71 104 (51 218, 84 245)               | 132 758 (86 502, 165 164)          |
| <b>Vaccae with lifelong protection</b>              |                         |                |                             |                |                            |                           |                                       |                                    |
| PSI, Older adult (60-y routine + 61-74 y catch-up)  | 1.862 (1.349, 2.726)    | 4.1 (3.1, 4.7) | 0.046 (0.038, 0.061)        | 4.6 (4.2, 5.0) | 6156 (4025, 13 363)        | 0.87 (0.72, 1.15)         | 7172 (4052, 15 642)                   | 7172 (4052, 15 642)                |
| PSI, All age (15-74 y, one campaign)                | 2.266 (1.710, 3.314)    | 4.9 (4.2, 5.3) | 0.051 (0.043, 0.066)        | 5.1 (4.7, 5.4) | 8434 (5654, 18 596)        | 1.06 (0.89, 1.39)         | 8076 (4730, 17 227)                   | 13 005 (7153, 25 576)              |
| P&PI, Older adult (60-y routine + 61-74 y catch-up) | 2.663 (1.950, 3.888)    | 5.8 (4.7, 6.6) | 0.065 (0.055, 0.090)        | 6.5 (6.0, 7.3) | 42 297 (41 317, 42 874)    | 1.26 (1.03, 1.67)         | 33 643 (24 901, 41 590)               | 99 767 (54 639, 126 140)           |
| P&PI, All age (15-74 y, one campaign)               | 3.625 (2.834, 5.586)    | 7.9 (7.4, 8.7) | 0.078 (0.066, 0.107)        | 7.7 (7.3, 8.6) | 79 989 (78 403, 80 632)    | 1.75 (1.48, 2.40)         | 45 884 (32 952, 54 297)               | 83 140 (52 900, 104 211)           |

<sup>a</sup>Strategies were in ascending order of effectiveness; <sup>b</sup>WTP was set at  $1 \times$  national pGDP (US\$12 458).

TB, tuberculosis. PSI, postinfection vaccine efficacy; P&PI, both pre- and postinfection vaccine efficacy. DALY, disability-adjusted life year;

ICER, incremental cost-effectiveness ratio, was calculated from healthcare sector perspective, with government contract price of US\$62/dose, coverage 20%, efficacy 54.7%, and costs and effectiveness discounted with 3% per year.

Data are presented as median and 95% CI.

**Table S20.** Cost-effectiveness for vaccination with *Vaccae* provided through private market during 2024-50, from societal perspective.

| Strategy                                            | TB cases (million)      |                | TB-related deaths (million) |                | Cost (US\$ million)        | DALY (million)            |                                       |                                    |
|-----------------------------------------------------|-------------------------|----------------|-----------------------------|----------------|----------------------------|---------------------------|---------------------------------------|------------------------------------|
| No <i>Vaccae</i> (status quo)                       | 45.587 (34.195, 74.175) |                | 1.016 (0.869-1.273)         |                | 133 712 (98 857, 213 263)  | 24.50 (20.73, 32.56)      |                                       |                                    |
|                                                     | TB cases averted        |                | TB-related deaths averted   |                | Incremental cost           | DALY averted <sup>a</sup> | ICER (US\$ per DALY averted) relative |                                    |
|                                                     | n (million)             | %              | n (million)                 | %              | (US\$ million)             | (million)                 | to status quo                         | to next best strategy <sup>b</sup> |
| <b>Vaccae with 10-y protection</b>                  |                         |                |                             |                |                            |                           |                                       |                                    |
| PSI, Older adult (60-y routine + 61-74 y catch-up)  | 1.184 (0.884, 1.767)    | 2.6 (2.1, 2.9) | 0.029 (0.024, 0.038)        | 2.9 (2.6, 3.1) | 5637 (3511, 12 728)        | 0.62 (0.52, 0.82)         | 9239 (4980, 20 279)                   | 9239 (4980, 20 279)                |
| P&PI, Older adult (60-y routine + 61-74 y catch-up) | 1.741 (1.300, 2.568)    | 3.8 (3.2, 4.3) | 0.042 (0.035, 0.060)        | 4.2 (3.8, 4.8) | 41 590 (40 046, 42 235)    | 0.91 (0.75, 1.25)         | 45 582 (32 221, 56 062)               | 130 953 (68 809, 172 430)          |
| PSI, All age (15-74 y, 10-yearly campaigns)         | 2.056 (1.574, 3.077)    | 4.5 (4.0, 4.8) | 0.046 (0.038, 0.060)        | 4.5 (4.2, 4.9) | 15 614 (10 068, 35 859)    | 0.99 (0.85, 1.33)         | 15 143 (8 912, 34 072)                | 26 152 (14 978, 54 281)            |
| P&PI, All age ((15-74 y, 10-yearly campaigns)       | 3.350 (2.618, 5.259)    | 7.4 (6.8, 8.2) | 0.070 (0.059, 0.100)        | 7.0 (6.5, 7.8) | 177 733 (172 375, 180 092) | 1.68 (1.41, 2.32)         | 106 384 (75 356, 127 448)             | 160 257 (110 072, 201 494)         |
| <b>Vaccae with 20-y protection</b>                  |                         |                |                             |                |                            |                           |                                       |                                    |
| PSI, Older adult (60-y routine + 61-74 y catch-up)  | 1.791 (1.299, 2.620)    | 3.9 (3.0, 4.5) | 0.044 (0.037, 0.059)        | 4.4 (4.0, 4.8) | 5009 (2628, 12 143)        | 0.85 (0.70, 1.12)         | 6034 (2703, 14 453)                   | 6034 (2703, 14 453)                |
| PSI, All age (15-74 y, 20-yearly campaigns)         | 2.171 (1.650, 3.209)    | 4.7 (4.1, 5.0) | 0.049 (0.041, 0.063)        | 4.9 (4.5, 5.2) | 9187 (5228, 22 987)        | 1.03 (0.87, 1.36)         | 8718 (4400, 21 380)                   | 24 140 (10 832, 54 651)            |
| P&PI, Older adult (60-y routine + 61-74 y catch-up) | 2.557 (1.881, 3.745)    | 5.6 (4.5, 6.4) | 0.063 (0.053, 0.087)        | 6.3 (5.8, 7.0) | 40 572 (38 668, 41 556)    | 1.23 (1.01, 1.64)         | 32 900 (23 504, 41 173)               | 100 041 (54 003, 127 654)          |
| P&PI, All age (15-74 y, 20-yearly campaigns)        | 3.487 (2.738, 5.414)    | 7.7 (7.2, 8.5) | 0.075 (0.063, 0.104)        | 7.4 (7.0, 8.3) | 115 640 (110 519, 117 962) | 1.72 (1.45, 2.36)         | 67 775 (47 775, 81 088)               | 126 728 (81 371, 159 993)          |
| <b>Vaccae with lifelong protection</b>              |                         |                |                             |                |                            |                           |                                       |                                    |
| PSI, Older adult (60-y routine + 61-74 y catch-up)  | 1.862 (1.349, 2.726)    | 4.1 (3.1, 4.7) | 0.046 (0.038, 0.061)        | 4.6 (4.2, 5.0) | 4950 (2539, 12 091)        | 0.87 (0.72, 1.15)         | 5823 (2548, 14 113)                   | 5823 (2548, 14 113)                |
| PSI, All age (15-74 y, one campaign)                | 2.266 (1.710, 3.314)    | 4.9 (4.2, 5.3) | 0.051 (0.043, 0.066)        | 5.1 (4.7, 5.4) | 5608 (2545, 15 793)        | 1.06 (0.89, 1.39)         | 5298 (2064, 14 254)                   | 5310 (-809, 18 217)                |
| P&PI, Older adult (60-y routine + 61-74 y catch-up) | 2.663 (1.950, 3.888)    | 5.8 (4.7, 6.6) | 0.065 (0.055, 0.090)        | 6.5 (6.0, 7.3) | 40 474 (38 533, 41 494)    | 1.26 (1.03, 1.67)         | 32 185 (23 018, 40 252)               | 182 312 (79 099, 369 943)          |
| P&PI, All age (15-74 y, one campaign)               | 3.625 (2.834, 5.586)    | 7.9 (7.4, 8.7) | 0.078 (0.066, 0.107)        | 7.7 (7.3, 8.6) | 73 702 (68 627, 75 991)    | 1.75 (1.48, 2.40)         | 42 647 (29 351, 51 128)               | 102 746 (61 233, 131 809)          |

<sup>a</sup>Strategies were in ascending order of effectiveness; <sup>b</sup>WTP was set at 1 × national pGDP (US\$12 458).

TB, tuberculosis. PSI, postinfection vaccine efficacy; P&PI, both pre- and postinfection vaccine efficacy. DALY, disability-adjusted life year; ICER, incremental cost-effectiveness ratio.

ICER, incremental cost-effectiveness ratio, was calculated from societal perspective, with government contract price of US\$62/dose, coverage 20%, efficacy 54.7%, and costs and effectiveness discounted with 3% per year.

Data are presented as median and 95% CI.

**Table S21.** Cost-effectiveness for government-funded national *Vaccae* vaccination in China during 2024-2100, from healthcare sector perspective.

| Strategy                                            | TB cases (million)    |                   | TB-related deaths (million) |                   | Cost (US\$ million)        | DALY (million)            | ICER (US\$ per DALY averted) relative |                           |
|-----------------------------------------------------|-----------------------|-------------------|-----------------------------|-------------------|----------------------------|---------------------------|---------------------------------------|---------------------------|
| No <i>Vaccae</i> (status quo)                       | 76.17 (56.03, 124.34) |                   | 1.81 (1.49, 2.57)           |                   | 51 218 (39 381, 82 293)    | 30.88 (25.80, 42.59)      |                                       |                           |
|                                                     | TB cases averted      |                   | TB-related deaths averted   |                   | Incremental cost           | DALY averted <sup>a</sup> | to status quo                         |                           |
|                                                     | n (million)           | %                 | n (million)                 | %                 | (US\$ million)             | (million)                 | to next best strategy <sup>b</sup>    |                           |
| <b>Vaccae with 10-y protection</b>                  |                       |                   |                             |                   |                            |                           |                                       |                           |
| PSI, Older adult (60-y routine + 61-74 y catch-up)  | 9.13 (6.54, 14.43)    | 11.9 (10.6, 13.0) | 0.23 (0.18, 0.35)           | 12.5 (11.6, 13.7) | 19 304 (12 311, 42 765)    | 3.75 (2.98, 4.98)         | 5295 (3018, 10 803)                   | 5295 (3018, 10 803)       |
| P&PI, Older adult (60-y routine + 61-74 y catch-up) | 13.37 (9.49, 21.23)   | 17.0 (15.2, 19.8) | 0.32 (0.25, 0.53)           | 17.9 (16.2, 21.2) | 160 025 (155 561, 162 340) | 5.38 (4.29, 7.80)         | 29 864 (20 075, 37 750)               | 90 258 (46 592, 121 236)  |
| PSI, All age (15-74 y, 10-yearly campaigns)         | 18.18 (13.63, 29.55)  | 23.9 (22.3, 26.3) | 0.43 (0.34, 0.66)           | 24.1 (22.5, 26.3) | 59 428 (41 405, 129 799)   | 6.53 (5.42, 9.31)         | 9071 (5824, 17 877)                   | 13 797 (9226, 26 202)     |
| P&PI, All age (15-74 y, 10-yearly campaigns)        | 28.52 (20.83, 46.83)  | 37.1 (33.5, 42.2) | 0.65 (0.49, 1.04)           | 35.8 (32.4, 41.0) | 741 389 (731 250, 745 372) | 10.32 (8.37, 14.75)       | 71 795 (49 733, 89 069)               | 110 146 (72 226, 139 828) |
| <b>Vaccae with 20-y protection</b>                  |                       |                   |                             |                   |                            |                           |                                       |                           |
| PSI, Older adult (60-y routine + 61-74 y catch-up)  | 15.83 (11.15, 24.42)  | 20.7 (17.0, 22.6) | 0.41 (0.32, 0.60)           | 22.3 (20.7, 24.1) | 16 317 (7983, 39 749)      | 5.62 (4.47, 7.56)         | 2929 (1271, 6796)                     | 2929 (1271, 6796)         |
| PSI, All age (15-74 y, 20-yearly campaigns)         | 19.85 (14.55, 31.24)  | 25.9 (23.6, 27.9) | 0.48 (0.38, 0.72)           | 26.4 (24.9, 28.7) | 32 986 (20 613, 77 047)    | 6.88 (5.64, 9.62)         | 4854 (2727, 10 259)                   | 13 265 (8216, 23 840)     |
| P&PI, Older adult (60-y routine + 61-74 y catch-up) | 22.20 (15.47, 33.99)  | 28.6 (25.0, 32.2) | 0.56 (0.44, 0.88)           | 31.0 (28.6, 35.0) | 155 575 (149 251, 159 315) | 7.91 (6.25, 11.04)        | 19 540 (13 652, 25 431)               | 64 708 (34 739, 83 182)   |
| P&PI, All age (15-74 y, 20-yearly campaigns)        | 30.53 (22.54, 49.81)  | 39.7 (36.7, 44.3) | 0.71 (0.54, 1.11)           | 39.2 (36.1, 44.0) | 426 086 (415 732, 430 257) | 10.75 (8.74, 15.40)       | 39 636 (27 247, 49 150)               | 79 546 (49 625, 102 675)  |
| <b>Vaccae with lifelong protection</b>              |                       |                   |                             |                   |                            |                           |                                       |                           |
| PSI, Older adult (60-y routine + 61-74 y catch-up)  | 19.19 (13.66, 29.74)  | 25.4 (20.4, 27.8) | 0.50 (0.39, 0.74)           | 27.6 (25.3, 29.7) | 14 866 (6280, 38 627)      | 6.20 (4.94, 8.40)         | 2443 (897, 6014)                      | 2443 (897, 6014)          |
| PSI, All age (15-74 y, one campaign)                | 20.00 (14.33, 29.89)  | 25.8 (22.6, 27.4) | 0.48 (0.38, 0.69)           | 26.6 (24.6, 28.2) | 19 837 (9708, 49 676)      | 6.88 (5.66, 9.33)         | 2902 (1248, 6747)                     | 7608 (3233, 22 857)       |
| P&PI, Older adult (60-y routine + 61-74 y catch-up) | 26.97 (18.72, 40.56)  | 34.7 (29.4, 38.9) | 0.68 (0.53, 1.06)           | 37.8 (35.2, 41.7) | 154 000 (146 780, 158 189) | 8.77 (6.86, 12.02)        | 17 529 (12 390, 22 988)               | 77 414 (40 126, 128 296)  |
| P&PI, All age (15-74 y, one campaign)               | 31.42 (23.36, 50.85)  | 41.0 (38.6, 44.3) | 0.75 (0.60, 1.15)           | 41.3 (39.3, 45.1) | 225 601 (215 014, 229 941) | 10.98 (8.97, 15.54)       | 20 615 (14 111, 25 691)               | 51 295 (29 509, 66 179)   |

<sup>a</sup>Strategies were in ascending order of effectiveness; <sup>b</sup> WTP was set at  $1 \times$  national pGDP (US\$12 458).

TB, tuberculosis. PSI, post-infection vaccine efficacy; P&PI, both pre- and post-infection vaccine efficacy; DALY, disability-adjusted life year.

ICER, incremental cost-effectiveness ratio, was calculated from healthcare sector perspective, with government contract price of US\$30/dose, and costs and effectiveness discounted with 3% per year.

Data are presented as median and 95%CI.

**Table S22.** Cost-effectiveness for government-funded national *Vaccae* vaccination in China during 2024-2100, from societal perspective.

| Strategy                                            | TB cases (million)    |                   | TB-related deaths (million) |                   | Cost (US\$ million)        | DALY (million)            |                                       |                                    |
|-----------------------------------------------------|-----------------------|-------------------|-----------------------------|-------------------|----------------------------|---------------------------|---------------------------------------|------------------------------------|
| No <i>Vaccae</i> (status quo)                       | 76.17 (56.03, 124.34) |                   | 1.81 (1.49, 2.57)           |                   | 156 976 (115 565, 254 394) | 30.88 (25.80, 42.59)      |                                       |                                    |
|                                                     | TB cases averted      |                   | TB-related deaths averted   |                   | Incremental cost           | DALY averted <sup>a</sup> | ICER (US\$ per DALY averted) relative |                                    |
|                                                     | n (million)           | %                 | n (million)                 | %                 | (US\$ million)             | (million)                 | to status quo                         | to next best strategy <sup>b</sup> |
| <b>Vaccae with 10-y protection</b>                  |                       |                   |                             |                   |                            |                           |                                       |                                    |
| PSI, Older adult (60-y routine + 61-74 y catch-up)  | 9.13 (6.54, 14.43)    | 11.9 (10.6, 13.0) | 0.23 (0.18, 0.35)           | 12.5 (11.6, 13.7) | 13 052 (5105, 36 279)      | 3.75 (2.98, 4.98)         | 3534 (1208, 9014)                     | 3534 (1208, 9014)                  |
| P&PI, Older adult (60-y routine + 61-74 y catch-up) | 13.37 (9.49, 21.23)   | 17.0 (15.2, 19.8) | 0.32 (0.25, 0.53)           | 17.9 (16.2, 21.2) | 151 774 (142 138, 156 052) | 5.38 (4.29, 7.80)         | 28 283 (18 361, 36 288)               | 88 559 (44 420, 119 694)           |
| PSI, All age (15-74 y, 10-yearly campaigns)         | 18.18 (13.63, 29.55)  | 23.9 (22.3, 26.3) | 0.43 (0.34, 0.66)           | 24.1 (22.5, 26.3) | 42 566 (22 749, 112 134)   | 6.53 (5.42, 9.31)         | 6452 (3087, 15 023)                   | 10 396 (4965, 22 102)              |
| P&PI, All age ((15-74 y, 10-yearly campaigns)       | 28.52 (20.83, 46.83)  | 37.1 (33.5, 42.2) | 0.65 (0.49, 1.04)           | 35.8 (32.4, 41.0) | 707 892 (676 638, 721 571) | 10.32 (8.37, 14.75)       | 68 862 (46 913, 86 253)               | 182 057 (104 150, 245 102)         |
| <b>Vaccae with 20-y protection</b>                  |                       |                   |                             |                   |                            |                           |                                       |                                    |
| PSI, Older adult (60-y routine + 61-74 y catch-up)  | 15.83 (11.15, 24.42)  | 20.7 (17.0, 22.6) | 0.41 (0.32, 0.60)           | 22.3 (20.7, 24.1) | 7 713 (-2168, 31 098)      | 5.62 (4.47, 7.56)         | 1437 (-337, 5206)                     | 1437 (-337, 5206)                  |
| PSI, All age (15-74 y, 20-yearly campaigns)         | 19.85 (14.55, 31.24)  | 25.9 (23.6, 27.9) | 0.48 (0.38, 0.72)           | 26.4 (24.9, 28.7) | 16 115 (1208, 59 652)      | 6.88 (5.64, 9.62)         | 2358 (158, 7554)                      | 7416 (1747, 18 458)                |
| P&PI, Older adult (60-y routine + 61-74 y catch-up) | 22.20 (15.47, 33.99)  | 28.6 (25.0, 32.2) | 0.56 (0.44, 0.88)           | 31.0 (28.6, 35.0) | 144 674 (131 268, 150 821) | 7.91 (6.25, 11.04)        | 18 101 (11 870, 24 106)               | 139 445 (55 287, 339 652)          |
| P&PI, All age (15-74 y, 20-yearly campaigns)        | 30.53 (22.54, 49.81)  | 39.7 (36.7, 44.3) | 0.71 (0.54, 1.11)           | 39.2 (36.1, 44.0) | 393 428 (363 006, 406 491) | 10.75 (8.74, 15.4)        | 36 815 (24 278, 46 385)               | 100 031 (56 424, 133 169)          |
| <b>Vaccae with lifelong protection</b>              |                       |                   |                             |                   |                            |                           |                                       |                                    |
| PSI, Older adult (60-y routine + 61-74 y catch-up)  | 19.19 (13.66, 29.74)  | 25.4 (20.4, 27.8) | 0.50 (0.39, 0.74)           | 27.6 (25.3, 29.7) | 5837 (-4808, 29 326)       | 6.20 (4.94, 8.40)         | 949 (-672, 4458)                      | 949 (-672, 4458)                   |
| PSI, All age (15-74 y, one campaign)                | 20.00 (14.33, 29.89)  | 25.8 (22.6, 27.4) | 0.48 (0.38, 0.69)           | 26.6 (24.6, 28.2) | 3635 (-9571, 32 916)       | 6.88 (5.66, 9.33)         | 562 (-1180, 4269)                     | -1834 (-6869, 9793)                |
| P&PI, Older adult (60-y routine + 61-74 y catch-up) | 26.97 (18.72, 40.56)  | 34.7 (29.4, 38.9) | 0.68 (0.53, 1.06)           | 37.8 (35.2, 41.7) | 141 812 (127 274, 149 072) | 8.77 (6.86, 12.02)        | 16 165 (10 529, 21 685)               | 78 226 (40 480, 132 363)           |
| P&PI, All age (15-74 y, one campaign)               | 31.42 (23.36, 50.85)  | 41.0 (38.6, 44.3) | 0.75 (0.60, 1.15)           | 41.3 (39.3, 45.1) | 194 265 (165 984, 206 263) | 10.98 (8.97, 15.54)       | 17 828 (11 103, 22 734)               | 47 319 (25 913, 62 738)            |

<sup>a</sup>Strategies were in ascending order of effectiveness; <sup>b</sup>WTP was set at 1 × national pGDP (US\$12 458).

TB, tuberculosis. PSI, post-infection vaccine efficacy; P&PI, both pre- and post-infection vaccine efficacy; DALY, disability-adjusted life year.

ICER, incremental cost-effectiveness ratio, was calculated from societal perspective, with government contract price of US\$30/dose, and costs and effectiveness discounted with 3% per year.

Data are presented as median and 95% CI.

**Table S23.** Cost-effectiveness for government-funded national *Vaccae* vaccination in China during 2024-50, from healthcare sector perspective (WTP=US\$7849).

| Strategy                                            | TB cases (million)   |                   | TB-related deaths (million) |                   | Cost (US\$ million)        | DALY (million)            |                                       |                                    |
|-----------------------------------------------------|----------------------|-------------------|-----------------------------|-------------------|----------------------------|---------------------------|---------------------------------------|------------------------------------|
| No <i>Vaccae</i> (status quo)                       | 45.59 (34.20, 74.18) |                   | 1.02 (0.87, 1.27)           |                   | 40 352 (30 942, 64 094)    | 24.5 (20.7, 32.6)         |                                       |                                    |
|                                                     | TB cases averted     |                   | TB-related deaths averted   |                   | Incremental cost           | DALY averted <sup>a</sup> | ICER (US\$ per DALY averted) relative |                                    |
|                                                     | n (million)          | %                 | n (million)                 | %                 | (US\$ million)             | (million)                 | to status quo                         | to next best strategy <sup>b</sup> |
| <b>Vaccae with 10-y protection</b>                  |                      |                   |                             |                   |                            |                           |                                       |                                    |
| PSI, Older adult (60-y routine + 61-74 y catch-up)  | 5.30 (3.97, 7.93)    | 11.7 (9.4, 12.9)  | 0.13 (0.11, 0.17)           | 13.0 (11.9, 14.0) | 18 305 (12 172, 39 281)    | 2.79 (2.32, 3.67)         | 6723 (3829, 14 098)                   | 6723 (3829, 14 098)                |
| P&PI, Older adult (60-y routine + 61-74 y catch-up) | 7.61 (5.72, 11.29)   | 16.6 (14.0, 18.7) | 0.19 (0.15, 0.26)           | 18.3 (17.0, 20.7) | 123 403 (120 282, 125 036) | 4.01 (3.32, 5.41)         | 30 797 (22 387, 37 671)               | 90 458 (50 443, 116 174)           |
| PSI, All age (15-74 y, 10-yearly campaigns)         | 9.21 (7.03, 13.81)   | 20.1 (17.8, 21.4) | 0.21 (0.17, 0.27)           | 20.3 (19.0, 21.6) | 52 908 (37 527, 113 380)   | 4.46 (3.81, 5.96)         | 11 815 (7506, 24 567)                 | 20 135 (13 367, 40 165)            |
| P&PI, All age ((15-74 y, 10-yearly campaigns)       | 14.16 (11.08, 22.18) | 31.1 (29.2, 33.6) | 0.30 (0.25, 0.41)           | 30.0 (28.3, 32.5) | 538 652 (532 094, 541 311) | 7.05 (6.01, 9.63)         | 76 430 (55 350, 89 932)               | 118 681 (84 464, 146 564)          |
| <b>Vaccae with 20-y protection</b>                  |                      |                   |                             |                   |                            |                           |                                       |                                    |
| PSI, Older adult (60-y routine + 61-74 y catch-up)  | 8.01 (5.82, 11.76)   | 17.7 (13.4, 20.0) | 0.20 (0.17, 0.26)           | 20.0 (18.1, 21.6) | 16 715 (9539, 37 704)      | 3.83 (3.16, 5.04)         | 4387 (2217, 10 085)                   | 4387 (2217, 10 085)                |
| PSI, All age (15-74 y, 20-yearly campaigns)         | 9.74 (7.40, 14.40)   | 21.2 (18.4, 22.6) | 0.22 (0.18, 0.28)           | 21.8 (20.2, 23.1) | 33 663 (22 432, 74 632)    | 4.63 (3.91, 6.10)         | 7315 (4259, 15 860)                   | 21 450 (12 797, 42 019)            |
| P&PI, Older adult (60-y routine + 61-74 y catch-up) | 11.27 (8.28, 16.54)  | 24.7 (19.9, 27.5) | 0.28 (0.23, 0.38)           | 27.8 (25.7, 30.3) | 120 883 (116 642, 123 262) | 5.42 (4.44, 7.05)         | 22 205 (16 616, 27 715)               | 69 036 (40 418, 86 908)            |
| P&PI, All age (15-74 y, 20-yearly campaigns)        | 14.93 (11.65, 22.97) | 32.7 (30.6, 35.1) | 0.32 (0.27, 0.43)           | 32.0 (30.4, 34.6) | 355 192 (348 620, 357 923) | 7.29 (6.22, 9.87)         | 48 746 (35 414, 57 384)               | 96 300 (65 229, 118 322)           |
| <b>Vaccae with lifelong protection</b>              |                      |                   |                             |                   |                            |                           |                                       |                                    |
| PSI, Older adult (60-y routine + 61-74 y catch-up)  | 8.35 (6.05, 12.23)   | 18.4 (13.9, 20.9) | 0.21 (0.17, 0.27)           | 20.8 (18.8, 22.5) | 16 556 (9263, 37 547)      | 3.91 (3.23, 5.17)         | 4234 (2097, 9833)                     | 4234 (2097, 9833)                  |
| PSI, All age (15-74 y, one campaign)                | 10.20 (7.68, 14.90)  | 22.0 (18.9, 23.6) | 0.23 (0.19, 0.30)           | 22.8 (21.1, 24.2) | 23 204 (14 279, 53 276)    | 4.76 (3.99, 6.22)         | 4933 (2644, 11 071)                   | 8788 (4675, 17 409)                |
| P&PI, Older adult (60-y routine + 61-74 y catch-up) | 11.70 (8.58, 17.20)  | 25.7 (20.6, 28.6) | 0.29 (0.24, 0.39)           | 28.8 (26.6, 31.5) | 120 639 (116 258, 123 078) | 5.55 (4.53, 7.20)         | 21 667 (16 207, 27 089)               | 67 664 (39 862, 85 144)            |
| P&PI, All age (15-74 y, one campaign)               | 15.60 (12.10, 23.90) | 33.9 (31.6, 36.5) | 0.34 (0.29, 0.45)           | 33.4 (31.7, 36.2) | 231 423 (224 826, 234 259) | 7.45 (6.34, 10.07)        | 31 091 (22 428, 36 845)               | 59 694 (39 583, 73 943)            |

<sup>a</sup>Strategies were in ascending order of effectiveness; <sup>b</sup> WTP was set at  $0.63 \times$  national pGDP (US\$7849).

TB, tuberculosis. PSI, post-infection vaccine efficacy; P&PI, both pre- and post-infection vaccine efficacy; DALY, disability-adjusted life year.

ICER, incremental cost-effectiveness ratio, was calculated from healthcare sector perspective, with government contract price of US\$ 30, and costs and effectiveness discounted with 3% per year. WTP was set at  $0.63 \times$  GDP per capita.

Data are presented as median and 95% CI.

**Table S24.** Cost-effectiveness for government-funded national *Vaccae* vaccination in China during 2024-50, from societal perspective (WTP=US\$7849).

| Strategy                                            | TB cases (million)   |                   | TB-related deaths (million) |                   | Cost (US\$ million)        | DALY (million)            |                                       |                                    |
|-----------------------------------------------------|----------------------|-------------------|-----------------------------|-------------------|----------------------------|---------------------------|---------------------------------------|------------------------------------|
| No <i>Vaccae</i> (status quo)                       | 45.59 (34.20, 74.18) |                   | 1.02 (0.87, 1.27)           |                   | 133 712 (98 857, 213 263)  | 24.50 (20.73, 32.56)      |                                       |                                    |
|                                                     | TB cases averted     |                   | TB-related deaths averted   |                   | Incremental cost           | DALY averted <sup>a</sup> | ICER (US\$ per DALY averted) relative |                                    |
|                                                     | n (million)          | %                 | n (million)                 | %                 | (US\$ million)             | (million)                 | to status quo                         | to next best strategy <sup>b</sup> |
| <b>Vaccae with 10-y protection</b>                  |                      |                   |                             |                   |                            |                           |                                       |                                    |
| PSI, Older adult (60-y routine + 61-74 y catch-up)  | 5.30 (3.97, 7.93)    | 11.7 (9.4, 12.9)  | 0.13 (0.11, 0.17)           | 13.0 (11.9, 14.0) | 13 847 (6983, 34 713)      | 2.79 (2.32, 3.67)         | 5006 (2206, 12 363)                   | 5007 (2208, 12 364)                |
| P&PI, Older adult (60-y routine + 61-74 y catch-up) | 7.61 (5.72, 11.29)   | 16.6 (14.0, 18.7) | 0.19 (0.15, 0.26)           | 18.3 (17.0, 20.7) | 117 395 (110 628, 120 194) | 4.01 (3.32, 5.41)         | 29 215 (20 684, 36 216)               | 88 875 (48 350, 114 634)           |
| PSI, All age (15-74 y, 10-yearly campaigns)         | 9.21 (7.03, 13.81)   | 20.1 (17.8, 21.4) | 0.21 (0.17, 0.27)           | 20.3 (19.0, 21.6) | 40 780 (23 942, 100 566)   | 4.46 (3.81, 5.96)         | 8844 (4580, 21 382)                   | 15 906 (8272, 34 828)              |
| P&PI, All age ((15-74 y, 10-yearly campaigns)       | 14.16 (11.08, 22.18) | 31.1 (29.2, 33.6) | 0.30 (0.25, 0.41)           | 30.0 (28.3, 32.5) | 512 655 (490 891, 522 187) | 7.05 (6.01, 9.63)         | 72 746 (51 390, 86 827)               | 113 745 (78 934, 142 254)          |
| <b>Vaccae with 20-y protection</b>                  |                      |                   |                             |                   |                            |                           |                                       |                                    |
| PSI, Older adult (60-y routine + 61-74 y catch-up)  | 8.01 (5.82, 11.76)   | 17.7 (13.4, 20.0) | 0.20 (0.17, 0.26)           | 20.0 (18.1, 21.6) | 10 986 (2920, 32 096)      | 3.83 (3.16, 5.04)         | 2867 (668, 8548)                      | 2868 (669, 8549)                   |
| PSI, All age (15-74 y, 20-yearly campaigns)         | 9.74 (7.40, 14.40)   | 21.2 (18.4, 22.6) | 0.22 (0.18, 0.28)           | 21.8 (20.2, 23.1) | 21 227 (8304, 62 093)      | 4.63 (3.91, 6.10)         | 4544 (1519, 12 823)                   | 13 742 (4838, 34 489)              |
| P&PI, Older adult (60-y routine + 61-74 y catch-up) | 11.27 (8.28, 16.54)  | 24.7 (19.9, 27.5) | 0.28 (0.23, 0.38)           | 27.8 (25.7, 30.3) | 112 940 (104 547, 117 279) | 5.42 (4.44, 7.05)         | 20 856 (14 578, 26 372)               | 67 563 (38 753, 85 517)            |
| P&PI, All age (15-74 y, 20-yearly campaigns)        | 14.93 (11.65, 22.97) | 32.7 (30.6, 35.1) | 0.32 (0.27, 0.43)           | 32.0 (30.4, 34.6) | 329 527 (308 761, 338 883) | 7.29 (6.22, 9.87)         | 45 505 (31 634, 54 248)               | 90 904 (59 682, 113 390)           |
| <b>Vaccae with lifelong protection</b>              |                      |                   |                             |                   |                            |                           |                                       |                                    |
| PSI, Older adult (60-y routine + 61-74 y catch-up)  | 8.35 (6.05, 12.23)   | 18.4 (13.9, 20.9) | 0.21 (0.17, 0.27)           | 20.8 (18.8, 22.5) | 10 676 (2523, 31 861)      | 3.91 (3.23, 5.17)         | 2723 (563, 8321)                      | 2724 (564, 8322)                   |
| PSI, All age (15-74 y, one campaign)                | 10.20 (7.68, 14.90)  | 22.0 (18.9, 23.6) | 0.23 (0.19, 0.30)           | 22.8 (21.1, 24.2) | 10 403 (-189, 40 783)      | 4.76 (3.99, 6.22)         | 2279 (-33, 8136)                      | 1192 (-3699, 10 102)               |
| P&PI, Older adult (60-y routine + 61-74 y catch-up) | 11.70 (8.58, 17.20)  | 25.7 (20.6, 28.6) | 0.29 (0.24, 0.39)           | 28.8 (26.6, 31.5) | 112 513 (103 948, 117 002) | 5.55 (4.53, 7.20)         | 20 272 (14 196, 25 752)               | 132 713 (66 360, 291 444)          |
| P&PI, All age (15-74 y, one campaign)               | 15.60 (12.1, 23.90)  | 33.9 (31.6, 36.5) | 0.34 (0.29, 0.45)           | 33.4 (31.7, 36.2) | 205 908 (185 311, 215 138) | 7.45 (6.34, 10.07)        | 27 897 (18 728, 33 644)               | 70 759 (43 035, 91 977)            |

<sup>a</sup>Strategies were in ascending order of effectiveness; <sup>b</sup> WTP was set at  $0.63 \times$  national pGDP (US\$7849).

TB, tuberculosis. PSI, post-infection vaccine efficacy; P&PI, both pre- and post-infection vaccine efficacy; DALY, disability-adjusted life year.

ICER, incremental cost-effectiveness ratio, was calculated from societal perspective, with government contract price of US\$30/dose, and costs and effectiveness discounted with 3% per year.

Data are presented as median and 95%CI.



**Table S25.** Budget impact of *Vaccae* older adult routine vaccination program in China during 2024-50, with PSI vaccine conferring 10-y protection, from healthcare sector perspective.

| Year                   | Screened population <sup>a</sup><br>(million) | Vaccinated population<br>(million) | Vaccination program<br>budget <sup>b</sup><br>(US\$ million) | Direct medical costs<br>averted<br>(US\$ million) | Net cost <sup>c</sup><br>(US\$ million) |
|------------------------|-----------------------------------------------|------------------------------------|--------------------------------------------------------------|---------------------------------------------------|-----------------------------------------|
| <b>Undiscounted</b>    |                                               |                                    |                                                              |                                                   |                                         |
| 2024                   | 216.46 (216.18, 216.63)                       | 40.15 (31.77, 75.75)               | 10 303 (8277, 18 906)                                        | 12.9 (9.03, 19.0)                                 | 10 291 (8265, 18 896)                   |
| 2025                   | 22.12 (22.09, 22.13)                          | 3.50 (2.67, 6.90)                  | 906 (707, 1729)                                              | 62.0 (44.0, 91.7)                                 | 846 (627, 1677)                         |
| 2026                   | 21.73 (21.71, 21.74)                          | 3.35 (2.55, 6.67)                  | 870 (677, 1673)                                              | 107 (76.9, 160)                                   | 768 (538, 1582)                         |
| 2027                   | 20.65 (20.63, 20.66)                          | 3.11 (2.36, 6.24)                  | 808 (627, 1565)                                              | 150 (108, 223)                                    | 668 (433, 1436)                         |
| 2028                   | 23.88 (23.86, 23.89)                          | 3.51 (2.65, 7.09)                  | 914 (706, 1780)                                              | 191 (138, 284)                                    | 733 (459, 1616)                         |
| 2029                   | 23.62 (23.60, 23.63)                          | 3.39 (2.55, 6.90)                  | 884 (680, 1732)                                              | 231 (165, 342)                                    | 659 (381, 1533)                         |
| 2030                   | 24.36 (24.33, 24.37)                          | 3.41 (2.55, 6.99)                  | 892 (684, 1756)                                              | 267 (192, 396)                                    | 630 (335, 1524)                         |
| 2031                   | 23.27 (23.25, 23.28)                          | 3.18 (2.37, 6.56)                  | 834 (637, 1649)                                              | 300 (216, 446)                                    | 538 (240, 1386)                         |
| 2032                   | 22.59 (22.57, 22.60)                          | 3.02 (2.23, 6.25)                  | 791 (602, 1573)                                              | 331 (240, 491)                                    | 465 (164, 1281)                         |
| 2033                   | 22.08 (22.06, 22.09)                          | 2.88 (2.12, 5.99)                  | 756 (574, 1509)                                              | 360 (262, 533)                                    | 398 (101, 1191)                         |
| 2034                   | 20.75 (20.74, 20.76)                          | 2.64 (1.94, 5.52)                  | 694 (525, 1392)                                              | 375 (274, 552)                                    | 314 (35, 1058)                          |
| 2035                   | 18.79 (18.77, 18.80)                          | 2.33 (1.70, 4.90)                  | 614 (463, 1236)                                              | 353 (261, 523)                                    | 255 (-3, 915)                           |
| 2036                   | 18.07 (18.06, 18.08)                          | 2.18 (1.59, 4.62)                  | 577 (434, 1165)                                              | 336 (252, 499)                                    | 237 (-5, 856)                           |
| 2037                   | 16.84 (16.83, 16.85)                          | 1.98 (1.44, 4.21)                  | 525 (393, 1064)                                              | 321 (242, 477)                                    | 204 (-21, 765)                          |
| 2038                   | 16.91 (16.90, 16.92)                          | 1.93 (1.40, 4.13)                  | 514 (384, 1045)                                              | 307 (230, 456)                                    | 207 (-7, 757)                           |
| 2039                   | 17.89 (17.88, 17.90)                          | 1.99 (1.43, 4.27)                  | 530 (395, 1082)                                              | 291 (219, 437)                                    | 238 (27, 804)                           |
| 2040                   | 18.58 (18.57, 18.59)                          | 2.00 (1.44, 4.34)                  | 535 (399, 1099)                                              | 279 (209, 418)                                    | 258 (51, 830)                           |
| 2041                   | 19.43 (19.42, 19.44)                          | 2.03 (1.46, 4.43)                  | 545 (406, 1124)                                              | 264 (199, 400)                                    | 281 (77, 865)                           |
| 2042                   | 21.04 (21.03, 21.05)                          | 2.13 (1.53, 4.68)                  | 574 (427, 1189)                                              | 251 (190, 384)                                    | 323 (117, 939)                          |
| 2043                   | 18.76 (18.75, 18.77)                          | 1.84 (1.32, 4.07)                  | 497 (370, 1035)                                              | 239 (180, 369)                                    | 257 (76, 795)                           |
| 2044                   | 19.78 (19.77, 19.79)                          | 1.88 (1.34, 4.18)                  | 509 (379, 1065)                                              | 230 (172, 356)                                    | 281 (101, 834)                          |
| 2045                   | 20.86 (20.85, 20.87)                          | 1.92 (1.37, 4.29)                  | 522 (388, 1095)                                              | 219 (164, 344)                                    | 304 (124, 873)                          |
| 2046                   | 22.55 (22.53, 22.56)                          | 2.01 (1.42, 4.51)                  | 547 (406, 1153)                                              | 210 (156, 333)                                    | 340 (156, 939)                          |
| 2047                   | 23.87 (23.85, 23.88)                          | 2.05 (1.45, 4.65)                  | 562 (417, 1189)                                              | 203 (149, 323)                                    | 361 (178, 981)                          |
| 2048                   | 22.87 (22.86, 22.88)                          | 1.90 (1.34, 4.33)                  | 522 (387, 1109)                                              | 196 (144, 316)                                    | 329 (156, 907)                          |
| 2049                   | 23.60 (23.59, 23.61)                          | 1.89 (1.33, 4.34)                  | 523 (387, 1113)                                              | 190 (139, 309)                                    | 334 (164, 916)                          |
| 2050                   | 24.54 (24.52, 24.54)                          | 1.90 (1.33, 4.37)                  | 526 (389, 1125)                                              | 185 (135, 303)                                    | 341 (173, 932)                          |
| Total                  | 765.87 (765.14, 766.24)                       | 104.39 (78.60, 211.15)             | 27 353 (21 119, 53 153)                                      | 6490 (4863, 9708)                                 | 21 040 (13 182, 47 088)                 |
| <b>Discounted (3%)</b> |                                               |                                    |                                                              |                                                   |                                         |
| Total                  | 765.87 (765.14, 766.24)                       | 104.39 (78.60, 211.15)             | 22 552 (17 554, 43 371)                                      | 4436 (3295, 6597)                                 | 18 305 (12 172, 39 281)                 |

PSI, postinfection vaccine efficacy. Data are presented as median and 95% CI.

The government contact price of *Vaccae* was assumed to be US\$30 per dose. Coverage 90% and efficacy 54.7%.

Six doses of vaccine required per person, plus buffer stock (5%) and vaccine wastage (15%)

<sup>a</sup>Screening population: 60-74 y olds in 2024, then 60-y olds from 2025 to 2050.

<sup>b</sup>Vaccination program budget = screening cost + vaccine cost + delivery and administrative cost

<sup>c</sup>Net cost (healthcare sector perspective) = vaccination program budget - direct medical costs averted

**Table S26.** Budget impact of *Vaccae* older adult routine vaccination program in China during 2024-50, with PSI vaccine conferring lifelong protection, from healthcare sector perspective.

| Year                   | Screened population <sup>a</sup><br>(million) | Vaccinated population<br>(million) | Vaccination program<br>budget <sup>b</sup><br>(US\$ million) | Direct medical costs<br>averted<br>(US\$ million) | Net cost <sup>c</sup><br>(US\$ million) |
|------------------------|-----------------------------------------------|------------------------------------|--------------------------------------------------------------|---------------------------------------------------|-----------------------------------------|
| <b>Undiscounted</b>    |                                               |                                    |                                                              |                                                   |                                         |
| 2024                   | 216.46 (216.18, 216.63)                       | 40.15 (31.77, 75.75)               | 10 303 (8277, 18 906)                                        | 12.9 (9.03, 19.0)                                 | 10 291 (8265, 18 896)                   |
| 2025                   | 22.12 (22.09, 22.13)                          | 3.49 (2.67, 6.90)                  | 906 (707, 1729)                                              | 62.0 (44.0, 91.7)                                 | 846 (627, 1677)                         |
| 2026                   | 21.73 (21.71, 21.74)                          | 3.35 (2.55, 6.67)                  | 870 (677, 1673)                                              | 107 (76.9, 160)                                   | 768 (538, 1582)                         |
| 2027                   | 20.65 (20.63, 20.66)                          | 3.11 (2.36, 6.24)                  | 808 (627, 1565)                                              | 150 (108, 223)                                    | 668 (433, 1436)                         |
| 2028                   | 23.88 (23.86, 23.89)                          | 3.51 (2.65, 7.09)                  | 914 (706, 1780)                                              | 191 (138, 284)                                    | 733 (459, 1616)                         |
| 2029                   | 23.62 (23.60, 23.63)                          | 3.39 (2.55, 6.90)                  | 884 (680, 1732)                                              | 231 (165, 342)                                    | 659 (381, 1533)                         |
| 2030                   | 24.36 (24.33, 24.37)                          | 3.41 (2.55, 6.99)                  | 892 (684, 1756)                                              | 267 (192, 396)                                    | 630 (335, 1524)                         |
| 2031                   | 23.27 (23.25, 23.28)                          | 3.18 (2.37, 6.56)                  | 834 (637, 1649)                                              | 300 (216, 446)                                    | 538 (240, 1386)                         |
| 2032                   | 22.59 (22.57, 22.60)                          | 3.02 (2.23, 6.25)                  | 791 (602, 1573)                                              | 331 (240, 491)                                    | 465 (164, 1281)                         |
| 2033                   | 22.08 (22.06, 22.09)                          | 2.88 (2.12, 5.99)                  | 756 (574, 1509)                                              | 360 (262, 533)                                    | 398 (101, 1191)                         |
| 2034                   | 20.75 (20.74, 20.76)                          | 2.64 (1.94, 5.52)                  | 694 (525, 1392)                                              | 388 (282, 570)                                    | 301 (19, 1049)                          |
| 2035                   | 18.79 (18.77, 18.80)                          | 2.33 (1.70, 4.90)                  | 614 (463, 1236)                                              | 412 (300, 605)                                    | 205 (-76, 870)                          |
| 2036                   | 18.07 (18.06, 18.08)                          | 2.18 (1.59, 4.61)                  | 577 (434, 1165)                                              | 433 (315, 635)                                    | 147 (-133, 779)                         |
| 2037                   | 16.84 (16.83, 16.85)                          | 1.98 (1.44, 4.21)                  | 524 (393, 1064)                                              | 452 (329, 661)                                    | 74 (-198, 660)                          |
| 2038                   | 16.91 (16.90, 16.92)                          | 1.93 (1.40, 4.13)                  | 514 (384, 1045)                                              | 469 (341, 684)                                    | 49 (-228, 626)                          |
| 2039                   | 17.89 (17.88, 17.90)                          | 1.99 (1.43, 4.27)                  | 530 (395, 1082)                                              | 483 (350, 703)                                    | 52 (-234, 650)                          |
| 2040                   | 18.58 (18.57, 18.59)                          | 2.00 (1.44, 4.33)                  | 535 (399, 1099)                                              | 495 (358, 719)                                    | 49 (-243, 656)                          |
| 2041                   | 19.43 (19.42, 19.44)                          | 2.03 (1.46, 4.42)                  | 544 (406, 1123)                                              | 504 (364, 732)                                    | 51 (-246, 671)                          |
| 2042                   | 21.04 (21.03, 21.05)                          | 2.13 (1.53, 4.67)                  | 573 (427, 1188)                                              | 511 (369, 741)                                    | 75 (-231, 730)                          |
| 2043                   | 18.76 (18.75, 18.77)                          | 1.84 (1.32, 4.06)                  | 497 (370, 1034)                                              | 515 (371, 748)                                    | -16 (-294, 571)                         |
| 2044                   | 19.78 (19.77, 19.79)                          | 1.88 (1.34, 4.17)                  | 509 (378, 1063)                                              | 516 (370, 751)                                    | -3 (-285, 598)                          |
| 2045                   | 20.86 (20.85, 20.87)                          | 1.92 (1.36, 4.28)                  | 521 (387, 1093)                                              | 515 (369, 752)                                    | 12 (-275, 627)                          |
| 2046                   | 22.55 (22.53, 22.56)                          | 2.00 (1.42, 4.50)                  | 546 (406, 1151)                                              | 513 (367, 752)                                    | 45 (-252, 685)                          |
| 2047                   | 23.87 (23.85, 23.88)                          | 2.05 (1.45, 4.64)                  | 561 (416, 1186)                                              | 509 (364, 750)                                    | 66 (-236, 722)                          |
| 2048                   | 22.87 (22.86, 22.88)                          | 1.89 (1.34, 4.32)                  | 521 (386, 1106)                                              | 504 (360, 746)                                    | 22 (-260, 643)                          |
| 2049                   | 23.60 (23.59, 23.61)                          | 1.89 (1.33, 4.32)                  | 521 (386, 1110)                                              | 500 (355, 742)                                    | 27 (-253, 650)                          |
| 2050                   | 24.54 (24.52, 24.54)                          | 1.89 (1.33, 4.36)                  | 524 (388, 1121)                                              | 494 (350, 736)                                    | 38 (-242, 664)                          |
| Total                  | 765.87 (765.14, 766.24)                       | 104.34 (78.58, 211.06)             | 27 340 (21 113, 53 131)                                      | 10 229 (7403, 14 975)                             | 17 702 (8147, 43 974)                   |
| <b>Discounted (3%)</b> |                                               |                                    |                                                              |                                                   |                                         |
| Total                  | 765.87 (765.14, 766.24)                       | 104.34 (78.58, 211.06)             | 22 545 (17 550, 43 359)                                      | 6508 (4716, 9539)                                 | 16 556 (9263, 37 547)                   |

PSI, postinfection vaccine efficacy. Data are presented as median and 95% CI.

The government contact price of *Vaccae* was assumed to be US\$30 per dose. Coverage 90% and efficacy 54.7%.

Six doses of vaccine required per person, plus buffer stock (5%) and vaccine wastage (15%)

<sup>a</sup>Screened population: 60-74 y olds in 2024, then 60-y olds from 2025 to 2050.

<sup>b</sup>Vaccination program budget = screening cost + vaccine cost + delivery and administrative cost

<sup>c</sup>Net cost (healthcare sector perspective) = vaccination program budget - direct medical costs averted

**Table S27.** Budget impact of *Vaccae* older adult routine vaccination program in China during 2024-50, with PSI vaccine conferring 10-y protection, from societal perspective.

| Year                   | Screened population <sup>a</sup><br>(million) | Vaccinated population<br>(million) | Vaccination program<br>budget <sup>b</sup><br>(US\$ million) | Direct and indirect<br>costs averted<br>(US\$ million) | Net cost <sup>c</sup><br>(US\$ million) |
|------------------------|-----------------------------------------------|------------------------------------|--------------------------------------------------------------|--------------------------------------------------------|-----------------------------------------|
| <b>Undiscounted</b>    |                                               |                                    |                                                              |                                                        |                                         |
| 2024                   | 216.46 (216.18, 216.63)                       | 40.15 (31.77, 75.75)               | 10 303 (8277, 18 906)                                        | 18.6 (13.1, 27.5)                                      | 10 286 (8258, 18 891)                   |
| 2025                   | 22.12 (22.09, 22.13)                          | 3.50 (2.67, 6.90)                  | 906 (707, 1,729)                                             | 94.6 (67.2, 138)                                       | 815 (586, 1649)                         |
| 2026                   | 21.73 (21.71, 21.74)                          | 3.35 (2.55, 6.67)                  | 870 (677, 1,673)                                             | 173 (126, 253)                                         | 702 (457, 1522)                         |
| 2027                   | 20.65 (20.63, 20.66)                          | 3.11 (2.36, 6.24)                  | 808 (627, 1,565)                                             | 251 (186, 368)                                         | 559 (301, 1340)                         |
| 2028                   | 23.88 (23.86, 23.89)                          | 3.51 (2.65, 7.09)                  | 914 (706, 1,780)                                             | 334 (246, 481)                                         | 587 (277, 1481)                         |
| 2029                   | 23.62 (23.60, 23.63)                          | 3.39 (2.55, 6.90)                  | 884 (680, 1,732)                                             | 414 (306, 596)                                         | 483 (153, 1360)                         |
| 2030                   | 24.36 (24.33, 24.37)                          | 3.41 (2.55, 6.99)                  | 892 (684, 1,756)                                             | 485 (362, 712)                                         | 414 (69, 1313)                          |
| 2031                   | 23.27 (23.25, 23.28)                          | 3.18 (2.37, 6.56)                  | 834 (637, 1,649)                                             | 555 (413, 821)                                         | 285 (-67, 1138)                         |
| 2032                   | 22.59 (22.57, 22.60)                          | 3.02 (2.23, 6.25)                  | 791 (602, 1,573)                                             | 620 (460, 922)                                         | 180 (-185, 998)                         |
| 2033                   | 22.08 (22.06, 22.09)                          | 2.88 (2.12, 5.99)                  | 756 (574, 1,509)                                             | 681 (503, 1015)                                        | 68 (-290, 876)                          |
| 2034                   | 20.75 (20.74, 20.76)                          | 2.64 (1.94, 5.52)                  | 694 (525, 1,392)                                             | 709 (534, 1078)                                        | -29 (-382, 720)                         |
| 2035                   | 18.79 (18.77, 18.80)                          | 2.33 (1.70, 4.90)                  | 614 (463, 1,236)                                             | 692 (529, 1050)                                        | -101 (-439, 568)                        |
| 2036                   | 18.07 (18.06, 18.08)                          | 2.18 (1.59, 4.62)                  | 577 (434, 1,165)                                             | 671 (514, 1019)                                        | -113 (-440, 505)                        |
| 2037                   | 16.84 (16.83, 16.85)                          | 1.98 (1.44, 4.21)                  | 525 (393, 1,064)                                             | 647 (498, 988)                                         | -135 (-451, 414)                        |
| 2038                   | 16.91 (16.90, 16.92)                          | 1.93 (1.40, 4.13)                  | 514 (384, 1,045)                                             | 624 (482, 958)                                         | -126 (-431, 407)                        |
| 2039                   | 17.89 (17.88, 17.90)                          | 1.99 (1.43, 4.27)                  | 530 (395, 1,082)                                             | 603 (465, 928)                                         | -93 (-388, 457)                         |
| 2040                   | 18.58 (18.57, 18.59)                          | 2.00 (1.44, 4.34)                  | 535 (399, 1,099)                                             | 585 (448, 899)                                         | -68 (-354, 488)                         |
| 2041                   | 19.43 (19.42, 19.44)                          | 2.03 (1.46, 4.43)                  | 545 (406, 1,124)                                             | 565 (429, 869)                                         | -39 (-316, 528)                         |
| 2042                   | 21.04 (21.03, 21.05)                          | 2.13 (1.53, 4.68)                  | 574 (427, 1,189)                                             | 544 (411, 840)                                         | 6 (-263, 609)                           |
| 2043                   | 18.76 (18.75, 18.77)                          | 1.84 (1.32, 4.07)                  | 497 (370, 1,035)                                             | 527 (393, 811)                                         | -39 (-299, 472)                         |
| 2044                   | 19.78 (19.77, 19.79)                          | 1.88 (1.34, 4.18)                  | 509 (379, 1,065)                                             | 508 (376, 784)                                         | -9 (-260, 518)                          |
| 2045                   | 20.86 (20.85, 20.87)                          | 1.92 (1.37, 4.29)                  | 522 (388, 1,095)                                             | 488 (360, 758)                                         | 19 (-222, 564)                          |
| 2046                   | 22.55 (22.53, 22.56)                          | 2.01 (1.42, 4.51)                  | 547 (406, 1,153)                                             | 470 (345, 733)                                         | 60 (-174, 639)                          |
| 2047                   | 23.87 (23.85, 23.88)                          | 2.05 (1.45, 4.65)                  | 562 (417, 1,189)                                             | 455 (331, 711)                                         | 94 (-139, 690)                          |
| 2048                   | 22.87 (22.86, 22.88)                          | 1.90 (1.34, 4.33)                  | 522 (387, 1,109)                                             | 439 (319, 692)                                         | 69 (-151, 623)                          |
| 2049                   | 23.60 (23.59, 23.61)                          | 1.89 (1.33, 4.34)                  | 523 (387, 1,113)                                             | 424 (308, 674)                                         | 83 (-132, 640)                          |
| 2050                   | 24.54 (24.52, 24.54)                          | 1.90 (1.33, 4.37)                  | 526 (389, 1,125)                                             | 411 (298, 658)                                         | 103 (-111, 664)                         |
| Total                  | 765.87 (765.14, 766.24)                       | 104.39 (78.60, 211.15)             | 27 353 (21 119, 53 153)                                      | 12 932 (9895, 19 953)                                  | 14 190 (5395, 40 072)                   |
| <b>Discounted (3%)</b> |                                               |                                    |                                                              |                                                        |                                         |
| Total                  | 765.87 (765.14, 766.24)                       | 104.39 (78.60, 211.15)             | 22 552 (17 554, 43 371)                                      | 8690 (6652, 13 365)                                    | 13 847 (6983, 34 713)                   |

PSI, postinfection vaccine efficacy. Data are presented as median and 95% CI.

The government contact price of *Vaccae* was assumed to be US\$30 per dose. Coverage 90% and efficacy 54.7%.

Six doses of vaccine required per person, plus buffer stock (5%) and vaccine wastage (15%)

<sup>a</sup>Screened population: 60-74 y olds in 2024, then 60-y olds from 2025 to 2050.

<sup>b</sup>Vaccination program budget = screening cost + vaccine cost + delivery and administrative cost

<sup>c</sup>Net cost (societal perspective) = vaccination program budget - direct and indirect costs averted

**Table S28.** Budget impact of *Vaccae* older adult routine vaccination program in China during 2024-50, with PSI vaccine conferring 20-y protection, from societal perspective.

| Year                   | Screened population <sup>a</sup><br>(million) | Vaccinated population<br>(million) | Vaccination program<br>budget <sup>b</sup><br>(US\$ million) | Direct and indirect<br>costs averted<br>(US\$ million) | Net cost <sup>c</sup><br>(US\$ million) |
|------------------------|-----------------------------------------------|------------------------------------|--------------------------------------------------------------|--------------------------------------------------------|-----------------------------------------|
| <b>Undiscounted</b>    |                                               |                                    |                                                              |                                                        |                                         |
| 2024                   | 216.46 (216.18, 216.63)                       | 40.15 (31.77, 75.75)               | 10 303 (8277, 18 906)                                        | 18.6 (13.1, 27.5)                                      | 10 286 (8258, 18 891)                   |
| 2025                   | 22.12 (22.09, 22.13)                          | 3.49 (2.67, 6.90)                  | 906 (707, 1729)                                              | 94.6 (67.2, 138)                                       | 815 (586, 1649)                         |
| 2026                   | 21.73 (21.71, 21.74)                          | 3.35 (2.55, 6.67)                  | 870 (677, 1673)                                              | 173 (126, 253)                                         | 702 (457, 1522)                         |
| 2027                   | 20.65 (20.63, 20.66)                          | 3.11 (2.36, 6.24)                  | 808 (627, 1565)                                              | 251 (186, 368)                                         | 559 (301, 1340)                         |
| 2028                   | 23.88 (23.86, 23.89)                          | 3.51 (2.65, 7.09)                  | 914 (706, 1780)                                              | 334 (246, 481)                                         | 587 (277, 1481)                         |
| 2029                   | 23.62 (23.60, 23.63)                          | 3.39 (2.55, 6.90)                  | 884 (680, 1732)                                              | 414 (306, 596)                                         | 483 (153, 1360)                         |
| 2030                   | 24.36 (24.33, 24.37)                          | 3.41 (2.55, 6.99)                  | 892 (684, 1756)                                              | 485 (362, 712)                                         | 414 (69, 1313)                          |
| 2031                   | 23.27 (23.25, 23.28)                          | 3.18 (2.37, 6.56)                  | 834 (637, 1649)                                              | 555 (413, 821)                                         | 285 (-67, 1138)                         |
| 2032                   | 22.59 (22.57, 22.60)                          | 3.02 (2.23, 6.25)                  | 791 (602, 1573)                                              | 620 (460, 922)                                         | 180 (-185, 998)                         |
| 2033                   | 22.08 (22.06, 22.09)                          | 2.88 (2.12, 5.99)                  | 756 (574, 1509)                                              | 681 (503, 1015)                                        | 68 (-290, 876)                          |
| 2034                   | 20.75 (20.74, 20.76)                          | 2.64 (1.94, 5.52)                  | 694 (525, 1392)                                              | 730 (545, 1100)                                        | -45 (-406, 706)                         |
| 2035                   | 18.79 (18.77, 18.80)                          | 2.33 (1.70, 4.90)                  | 614 (463, 1236)                                              | 773 (582, 1177)                                        | -166 (-549, 502)                        |
| 2036                   | 18.07 (18.06, 18.08)                          | 2.18 (1.59, 4.61)                  | 577 (434, 1165)                                              | 811 (615, 1245)                                        | -239 (-635, 389)                        |
| 2037                   | 16.84 (16.83, 16.85)                          | 1.98 (1.44, 4.21)                  | 524 (393, 1064)                                              | 846 (642, 1301)                                        | -313 (-730, 249)                        |
| 2038                   | 16.91 (16.90, 16.92)                          | 1.93 (1.40, 4.13)                  | 514 (384, 1045)                                              | 878 (662, 1349)                                        | -350 (-786, 199)                        |
| 2039                   | 17.89 (17.88, 17.90)                          | 1.99 (1.43, 4.27)                  | 530 (395, 1082)                                              | 903 (678, 1389)                                        | -358 (-807, 210)                        |
| 2040                   | 18.58 (18.57, 18.59)                          | 2.00 (1.44, 4.33)                  | 535 (399, 1099)                                              | 922 (690, 1420)                                        | -367 (-831, 205)                        |
| 2041                   | 19.43 (19.42, 19.44)                          | 2.03 (1.46, 4.42)                  | 544 (406, 1123)                                              | 933 (698, 1445)                                        | -369 (-844, 212)                        |
| 2042                   | 21.04 (21.03, 21.05)                          | 2.13 (1.53, 4.67)                  | 573 (427, 1188)                                              | 942 (703, 1462)                                        | -351 (-831, 264)                        |
| 2043                   | 18.76 (18.75, 18.77)                          | 1.84 (1.32, 4.06)                  | 497 (370, 1034)                                              | 950 (705, 1474)                                        | -418 (-915, 105)                        |
| 2044                   | 19.78 (19.77, 19.79)                          | 1.88 (1.34, 4.17)                  | 509 (378, 1063)                                              | 948 (698, 1465)                                        | -398 (-893, 136)                        |
| 2045                   | 20.86 (20.85, 20.87)                          | 1.92 (1.36, 4.28)                  | 521 (387, 1093)                                              | 915 (671, 1415)                                        | -352 (-833, 187)                        |
| 2046                   | 22.55 (22.53, 22.56)                          | 2.00 (1.42, 4.50)                  | 546 (406, 1151)                                              | 883 (646, 1368)                                        | -302 (-762, 268)                        |
| 2047                   | 23.87 (23.85, 23.88)                          | 2.05 (1.45, 4.64)                  | 561 (416, 1186)                                              | 851 (622, 1325)                                        | -260 (-705, 326)                        |
| 2048                   | 22.87 (22.86, 22.88)                          | 1.89 (1.34, 4.32)                  | 521 (386, 1106)                                              | 823 (600, 1286)                                        | -269 (-703, 268)                        |
| 2049                   | 23.60 (23.59, 23.61)                          | 1.89 (1.33, 4.32)                  | 521 (386, 1110)                                              | 792 (578, 1248)                                        | -243 (-665, 293)                        |
| 2050                   | 24.54 (24.52, 24.54)                          | 1.89 (1.33, 4.36)                  | 525 (388, 1121)                                              | 765 (557, 1212)                                        | -215 (-624, 325)                        |
| Total                  | 765.87 (765.14, 766.24)                       | 104.34 (78.58, 211.06)             | 27 340 (21 113, 53 132)                                      | 18 274 (13 679, 28 250)                                | 9124 (-1807, 35 409)                    |
| <b>Discounted (3%)</b> |                                               |                                    |                                                              |                                                        |                                         |
| Total                  | 765.87 (765.14, 766.24)                       | 104.34 (78.58, 211.06)             | 22 545 (17 550, 43 359)                                      | 11 655 (8788, 18 048)                                  | 10 986 (2920, 32 096)                   |

PSI, postinfection vaccine efficacy. Data are presented as median and 95% CI.

The government contact price of *Vaccae* was assumed to be US\$30 per dose. Coverage 90% and efficacy 54.7%.

Six doses of vaccine required per person, plus buffer stock (5%) and vaccine wastage (15%)

<sup>a</sup>Screened population: 60-74 y olds in 2024, then 60-y olds from 2025 to 2050.

<sup>b</sup>Vaccination program budget = screening cost + vaccine cost + delivery and administrative cost

<sup>c</sup>Net cost (societal perspective) = vaccination program budget - direct and indirect costs averted

**Table S29.** Budget impact of *Vaccae* older adult routine vaccination program in China during 2024-50, with PSI vaccine conferring lifelong protection, from societal perspective.

| Year                   | Screened population <sup>a</sup><br>(million) | Vaccinated population<br>(million) | Vaccination program<br>budget <sup>b</sup><br>(US\$ million) | Direct and indirect<br>costs averted<br>(US\$ million) | Net cost <sup>c</sup><br>(US\$ million) |
|------------------------|-----------------------------------------------|------------------------------------|--------------------------------------------------------------|--------------------------------------------------------|-----------------------------------------|
| <b>Undiscounted</b>    |                                               |                                    |                                                              |                                                        |                                         |
| 2024                   | 216.46 (216.18, 216.63)                       | 40.15 (31.77, 75.75)               | 10 303 (8277, 18 906)                                        | 18.6 (13.1, 27.5)                                      | 10 286 (8258, 18 891)                   |
| 2025                   | 22.12 (22.09, 22.13)                          | 3.49 (2.67, 6.90)                  | 906 (707, 1729)                                              | 94.6 (67.2, 138)                                       | 815 (586, 1649)                         |
| 2026                   | 21.73 (21.71, 21.74)                          | 3.35 (2.55, 6.67)                  | 870 (677, 1673)                                              | 173 (126, 253)                                         | 702 (457, 1522)                         |
| 2027                   | 20.65 (20.63, 20.66)                          | 3.11 (2.36, 6.24)                  | 808 (627, 1565)                                              | 251 (186, 368)                                         | 559 (301, 1340)                         |
| 2028                   | 23.88 (23.86, 23.89)                          | 3.51 (2.65, 7.09)                  | 914 (706, 1780)                                              | 334 (246, 481)                                         | 587 (277, 1481)                         |
| 2029                   | 23.62 (23.60, 23.63)                          | 3.39 (2.55, 6.90)                  | 884 (680, 1732)                                              | 414 (306, 596)                                         | 483 (153, 1360)                         |
| 2030                   | 24.36 (24.33, 24.37)                          | 3.41 (2.55, 6.99)                  | 892 (684, 1756)                                              | 485 (362, 712)                                         | 414 (69, 1313)                          |
| 2031                   | 23.27 (23.25, 23.28)                          | 3.18 (2.37, 6.56)                  | 834 (637, 1649)                                              | 555 (413, 821)                                         | 285 (-67, 1138)                         |
| 2032                   | 22.59 (22.57, 22.60)                          | 3.02 (2.23, 6.25)                  | 791 (602, 1573)                                              | 620 (460, 922)                                         | 180 (-185, 998)                         |
| 2033                   | 22.08 (22.06, 22.09)                          | 2.88 (2.12, 5.99)                  | 756 (574, 1509)                                              | 681 (503, 1015)                                        | 68 (-290, 876)                          |
| 2034                   | 20.75 (20.74, 20.76)                          | 2.64 (1.94, 5.52)                  | 694 (525, 1392)                                              | 730 (545, 1100)                                        | -45 (-406, 706)                         |
| 2035                   | 18.79 (18.77, 18.80)                          | 2.33 (1.70, 4.90)                  | 614 (463, 1236)                                              | 773 (582, 1177)                                        | -166 (-549, 502)                        |
| 2036                   | 18.07 (18.06, 18.08)                          | 2.18 (1.59, 4.61)                  | 577 (434, 1165)                                              | 811 (615, 1245)                                        | -239 (-635, 389)                        |
| 2037                   | 16.84 (16.83, 16.85)                          | 1.98 (1.44, 4.21)                  | 524 (393, 1064)                                              | 846 (642, 1301)                                        | -313 (-730, 249)                        |
| 2038                   | 16.91 (16.90, 16.92)                          | 1.93 (1.40, 4.13)                  | 514 (384, 1045)                                              | 878 (662, 1349)                                        | -350 (-786, 199)                        |
| 2039                   | 17.89 (17.88, 17.90)                          | 1.99 (1.43, 4.27)                  | 530 (395, 1082)                                              | 903 (678, 1389)                                        | -358 (-807, 210)                        |
| 2040                   | 18.58 (18.57, 18.59)                          | 2.00 (1.44, 4.33)                  | 535 (399, 1099)                                              | 922 (690, 1420)                                        | -367 (-831, 205)                        |
| 2041                   | 19.43 (19.42, 19.44)                          | 2.03 (1.46, 4.42)                  | 544 (406, 1123)                                              | 933 (698, 1445)                                        | -369 (-844, 212)                        |
| 2042                   | 21.04 (21.03, 21.05)                          | 2.13 (1.53, 4.67)                  | 573 (427, 1188)                                              | 942 (703, 1462)                                        | -351 (-831, 264)                        |
| 2043                   | 18.76 (18.75, 18.77)                          | 1.84 (1.32, 4.06)                  | 497 (370, 1034)                                              | 950 (705, 1474)                                        | -418 (-915, 105)                        |
| 2044                   | 19.78 (19.77, 19.79)                          | 1.88 (1.34, 4.17)                  | 509 (378, 1063)                                              | 955 (704, 1480)                                        | -407 (-907, 129)                        |
| 2045                   | 20.86 (20.85, 20.87)                          | 1.92 (1.36, 4.28)                  | 521 (387, 1093)                                              | 957 (701, 1481)                                        | -394 (-894, 155)                        |
| 2046                   | 22.55 (22.53, 22.56)                          | 2.00 (1.42, 4.50)                  | 546 (406, 1151)                                              | 955 (695, 1477)                                        | -363 (-863, 213)                        |
| 2047                   | 23.87 (23.85, 23.88)                          | 2.05 (1.45, 4.64)                  | 561 (416, 1186)                                              | 949 (688, 1469)                                        | -341 (-839, 253)                        |
| 2048                   | 22.87 (22.86, 22.88)                          | 1.89 (1.34, 4.32)                  | 521 (386, 1106)                                              | 939 (679, 1459)                                        | -372 (-865, 178)                        |
| 2049                   | 23.60 (23.59, 23.61)                          | 1.89 (1.33, 4.32)                  | 521 (386, 1110)                                              | 926 (669, 1446)                                        | -362 (-850, 190)                        |
| 2050                   | 24.54 (24.52, 24.54)                          | 1.89 (1.33, 4.36)                  | 524 (388, 1121)                                              | 912 (657, 1430)                                        | -348 (-829, 210)                        |
| Total                  | 765.87 (765.14, 766.24)                       | 104.34 (78.58, 211.06)             | 27 340 (21 113, 53 131)                                      | 18 812 (14 100, 29 185)                                | 8493 (-2661, 34 932)                    |
| <b>Discounted (3%)</b> |                                               |                                    |                                                              |                                                        |                                         |
| Total                  | 765.87 (765.14, 766.24)                       | 104.34 (78.58, 211.06)             | 22 545 (17 550, 43 359)                                      | 11 968 (8995, 18 519)                                  | 10 676 (2523, 31 861)                   |

PSI, postinfection vaccine efficacy. Data are presented as median and 95% CI.

The government contact price of *Vaccae* was assumed to be US\$30 per dose. Coverage 90% and efficacy 54.7%.

Six doses of vaccine required per person, plus buffer stock (5%) and vaccine wastage (15%)

<sup>a</sup>Screened population: 60-74 y olds in 2024, then 60-y olds from 2025 to 2050.

<sup>b</sup>Vaccination program budget = screening cost + vaccine cost + delivery and administrative cost

<sup>c</sup>Net cost (societal perspective) = vaccination program budget - direct and indirect costs averted

**Table S30.** Budget impact of *Vaccae* older adult routine vaccination program in China during 2024-50, with P&PI vaccine conferring 10-y protection, from healthcare sector perspective.

| Year                   | Vaccinated population <sup>a</sup><br>(million) | Vaccination program<br>budget <sup>b</sup><br>(US\$ million) | Direct medical costs<br>averted<br>(US\$ million) | Net cost <sup>c</sup><br>(US\$ million) |
|------------------------|-------------------------------------------------|--------------------------------------------------------------|---------------------------------------------------|-----------------------------------------|
| <b>Undiscounted</b>    |                                                 |                                                              |                                                   |                                         |
| 2024                   | 195.58 (195.32, 195.74)                         | 47 269 (47 206, 47 307)                                      | 18.5 (13.6, 26.8)                                 | 47 250 (47 181, 47 292)                 |
| 2025                   | 19.95 (19.93, 19.96)                            | 4821 (4817, 4824)                                            | 89.1 (65.9, 129)                                  | 4732 (4688, 4756)                       |
| 2026                   | 19.60 (19.58, 19.61)                            | 4737 (4732, 4739)                                            | 155 (115, 223)                                    | 4582 (4509, 4623)                       |
| 2027                   | 18.63 (18.61, 18.64)                            | 4502 (4498, 4504)                                            | 217 (162, 312)                                    | 4286 (4186, 4341)                       |
| 2028                   | 21.54 (21.52, 21.55)                            | 5206 (5201, 5208)                                            | 274 (207, 395)                                    | 4932 (4806, 5001)                       |
| 2029                   | 21.30 (21.28, 21.31)                            | 5148 (5143, 5150)                                            | 327 (248, 473)                                    | 4821 (4670, 4902)                       |
| 2030                   | 21.97 (21.95, 21.98)                            | 5309 (5304, 5311)                                            | 378 (286, 548)                                    | 4930 (4756, 5024)                       |
| 2031                   | 20.99 (20.97, 20.99)                            | 5072 (5067, 5074)                                            | 425 (322, 617)                                    | 4646 (4449, 4751)                       |
| 2032                   | 20.37 (20.35, 20.38)                            | 4923 (4919, 4925)                                            | 469 (355, 682)                                    | 4453 (4,237, 4570)                      |
| 2033                   | 19.91 (19.90, 19.92)                            | 4813 (4808, 4814)                                            | 510 (385, 741)                                    | 4301 (4067, 4429)                       |
| 2034                   | 18.71 (18.70, 18.72)                            | 4523 (4519, 4524)                                            | 532 (400, 772)                                    | 3991 (3747, 4123)                       |
| 2035                   | 16.94 (16.92, 16.95)                            | 4094 (4090, 4095)                                            | 503 (381, 735)                                    | 3591 (3355, 3714)                       |
| 2036                   | 16.29 (16.28, 16.30)                            | 3938 (3934, 3939)                                            | 481 (363, 703)                                    | 3456 (3232, 3576)                       |
| 2037                   | 15.19 (15.17, 15.19)                            | 3670 (3667, 3672)                                            | 460 (346, 674)                                    | 3210 (2994, 3324)                       |
| 2038                   | 15.25 (15.23, 15.25)                            | 3684 (3681, 3686)                                            | 440 (331, 648)                                    | 3244 (3033, 3354)                       |
| 2039                   | 16.13 (16.12, 16.14)                            | 3898 (3895, 3900)                                            | 423 (316, 627)                                    | 3476 (3268, 3583)                       |
| 2040                   | 16.75 (16.74, 16.76)                            | 4048 (4045, 4050)                                            | 406 (302, 606)                                    | 3643 (3439, 3748)                       |
| 2041                   | 17.52 (17.50, 17.52)                            | 4234 (4230, 4235)                                            | 389 (286, 585)                                    | 3845 (3645, 3949)                       |
| 2042                   | 18.97 (18.95, 18.97)                            | 4584 (4581, 4585)                                            | 369 (271, 565)                                    | 4215 (4015, 4314)                       |
| 2043                   | 16.91 (16.90, 16.92)                            | 4088 (4085, 4089)                                            | 351 (257, 546)                                    | 3737 (3539, 3832)                       |
| 2044                   | 17.83 (17.82, 17.84)                            | 4309 (4306, 4311)                                            | 334 (244, 528)                                    | 3976 (3779, 4067)                       |
| 2045                   | 18.80 (18.79, 18.81)                            | 4544 (4541, 4545)                                            | 319 (232, 511)                                    | 4225 (4031, 4313)                       |
| 2046                   | 20.32 (20.31, 20.33)                            | 4911 (4908, 4913)                                            | 306 (221, 493)                                    | 4606 (4416, 4691)                       |
| 2047                   | 21.51 (21.50, 21.52)                            | 5199 (5196, 5200)                                            | 294 (212, 478)                                    | 4905 (4720, 4988)                       |
| 2048                   | 20.61 (20.60, 20.62)                            | 4982 (4979, 4983)                                            | 283 (205, 465)                                    | 4699 (4516, 4778)                       |
| 2049                   | 21.27 (21.26, 21.28)                            | 5140 (5138, 5142)                                            | 274 (198, 453)                                    | 4866 (4686, 4943)                       |
| 2050                   | 22.11 (22.10, 22.12)                            | 5344 (5341, 5345)                                            | 267 (193, 444)                                    | 5077 (4899, 5152)                       |
| Total                  | 690.94 (690.28, 691.28)                         | 166 987 (166 827, 167 068)                                   | 9316 (7007, 13 822)                               | 157 635 (153 012, 160 023)              |
| <b>Discounted (3%)</b> |                                                 |                                                              |                                                   |                                         |
| Total                  | 690.94 (690.28, 691.28)                         | 129 785 (129 650, 129 852)                                   | 6377 (4784, 9370)                                 | 123 403 (120 282, 125 036)              |

P&PI, both pre- and postinfection vaccine efficacy. Data are presented as median and 95% CI.

The government contact price of *Vaccae* was assumed to be US\$30 per dose. Coverage 90% and efficacy 54.7%.

Six doses of vaccine required per person, plus buffer stock (5%) and vaccine wastage (15%)

<sup>a</sup> Vaccinated population: 60-74 y olds in 2024, then 60-y olds from 2025 to 2050.

<sup>b</sup> Vaccination program budget = screening cost + vaccine cost + delivery and administrative cost

<sup>c</sup> Net cost (healthcare sector perspective) = vaccination program budget - direct medical costs averted

**Table S31.** Budget impact of *Vaccae* older adult routine vaccination program in China during 2024-50, with P&PI vaccine conferring 20-y protection, from healthcare sector perspective.

| Year                   | Vaccinated population <sup>a</sup><br>(million) | Vaccination program<br>budget <sup>b</sup><br>(US\$ million) | Direct medical costs<br>averted<br>(US\$ million) | Net cost <sup>c</sup><br>(US\$ million) |
|------------------------|-------------------------------------------------|--------------------------------------------------------------|---------------------------------------------------|-----------------------------------------|
| <b>Undiscounted</b>    |                                                 |                                                              |                                                   |                                         |
| 2024                   | 195.58 (195.32, 195.74)                         | 47 269 (47 206, 47 307)                                      | 18.5 (13.6, 26.8)                                 | 47 250 (47 181, 47 292)                 |
| 2025                   | 19.95 (19.93, 19.96)                            | 4821 (4817, 4824)                                            | 89.1 (65.9, 129)                                  | 4732 (4688, 4756)                       |
| 2026                   | 19.60 (19.58, 19.61)                            | 4737 (4732, 4739)                                            | 155 (115, 223)                                    | 4582 (4509, 4623)                       |
| 2027                   | 18.63 (18.61, 18.64)                            | 4502 (4498, 4504)                                            | 217 (162, 312)                                    | 4286 (4186, 4341)                       |
| 2028                   | 21.54 (21.52, 21.55)                            | 5206 (5201, 5208)                                            | 274 (207, 395)                                    | 4932 (4806, 5001)                       |
| 2029                   | 21.30 (21.28, 21.31)                            | 5148 (5143, 5150)                                            | 327 (248, 473)                                    | 4821 (4670, 4902)                       |
| 2030                   | 21.97 (21.95, 21.98)                            | 5309 (5304, 5311)                                            | 378 (286, 548)                                    | 4930 (4756, 5024)                       |
| 2031                   | 20.99 (20.97, 20.99)                            | 5072 (5067, 5074)                                            | 425 (322, 617)                                    | 4646 (4449, 4751)                       |
| 2032                   | 20.37 (20.35, 20.38)                            | 4923 (4919, 4925)                                            | 469 (355, 682)                                    | 4453 (4237, 4570)                       |
| 2033                   | 19.91 (19.90, 19.92)                            | 4813 (4808, 4814)                                            | 510 (385, 741)                                    | 4301 (4067, 4429)                       |
| 2034                   | 18.71 (18.70, 18.72)                            | 4523 (4519, 4524)                                            | 547 (412, 795)                                    | 3975 (3724, 4112)                       |
| 2035                   | 16.94 (16.93, 16.95)                            | 4094 (4090, 4095)                                            | 580 (435, 845)                                    | 3513 (3246, 3660)                       |
| 2036                   | 16.29 (16.28, 16.30)                            | 3938 (3934, 3939)                                            | 608 (455, 889)                                    | 3329 (3046, 3483)                       |
| 2037                   | 15.19 (15.17, 15.19)                            | 3670 (3667, 3672)                                            | 635 (472, 928)                                    | 3034 (2740, 3199)                       |
| 2038                   | 15.25 (15.23, 15.25)                            | 3684 (3681, 3686)                                            | 658 (486, 961)                                    | 3025 (2721, 3199)                       |
| 2039                   | 16.13 (16.12, 16.14)                            | 3898 (3895, 3900)                                            | 676 (497, 989)                                    | 3221 (2907, 3401)                       |
| 2040                   | 16.75 (16.74, 16.76)                            | 4048 (4045, 4050)                                            | 690 (506, 1012)                                   | 3357 (3034, 3543)                       |
| 2041                   | 17.52 (17.50, 17.52)                            | 4234 (4230, 4235)                                            | 701 (512, 1030)                                   | 3533 (3201, 3722)                       |
| 2042                   | 18.97 (18.95, 18.97)                            | 4584 (4581, 4586)                                            | 706 (515, 1043)                                   | 3877 (3539, 4070)                       |
| 2043                   | 16.91 (16.90, 16.92)                            | 4088 (4085, 4089)                                            | 709 (516, 1052)                                   | 3379 (3034, 3572)                       |
| 2044                   | 17.83 (17.82, 17.84)                            | 4309 (4306, 4311)                                            | 704 (509, 1044)                                   | 3606 (3263, 3801)                       |
| 2045                   | 18.80 (18.79, 18.81)                            | 4544 (4541, 4545)                                            | 675 (486, 1001)                                   | 3870 (3540, 4059)                       |
| 2046                   | 20.32 (20.31, 20.33)                            | 4911 (4908, 4913)                                            | 648 (465, 964)                                    | 4263 (3946, 4447)                       |
| 2047                   | 21.51 (21.50, 21.52)                            | 5199 (5196, 5200)                                            | 622 (446, 930)                                    | 4577 (4266, 4754)                       |
| 2048                   | 20.61 (20.60, 20.62)                            | 4982 (4979, 4983)                                            | 598 (428, 901)                                    | 4384 (4079, 4554)                       |
| 2049                   | 21.27 (21.26, 21.28)                            | 5140 (5138, 5142)                                            | 581 (412, 873)                                    | 4560 (4265, 4729)                       |
| 2050                   | 22.11 (22.10, 22.12)                            | 5344 (5341, 5345)                                            | 561 (397, 847)                                    | 4782 (4494, 4947)                       |
| Total                  | 690.95 (690.28, 691.28)                         | 166 988 (166 827, 167 068)                                   | 13 798 (10 135, 20 250)                           | 153 190 (146 585, 156 895)              |
| <b>Discounted (3%)</b> |                                                 |                                                              |                                                   |                                         |
| Total                  | 690.95 (690.28, 691.28)                         | 129 786 (129 651, 129 852)                                   | 8877 (6558, 13 010)                               | 120 883 (116 642, 123 262)              |

P&PI, both pre- and postinfection vaccine efficacy. Data are presented as median and 95% CI.

The government contact price of *Vaccae* was assumed to be US\$30 per dose. Coverage 90% and efficacy 54.7%.

Six doses of vaccine required per person, plus buffer stock (5%) and vaccine wastage (15%)

<sup>a</sup>Vaccinated population: 60-74 y olds in 2024, then 60-y olds from 2025 to 2050.

<sup>b</sup>Vaccination program budget = screening cost + vaccine cost + delivery and administrative cost

<sup>c</sup>Net cost (healthcare sector perspective) = vaccination program budget - direct medical costs averted

**Table S32.** Budget impact of *Vaccae* older adult routine vaccination program in China during 2024-50, with P&PI vaccine conferring lifelong protection, from healthcare sector perspective.

| Year                   | Vaccinated population <sup>a</sup><br>(million) | Vaccination program<br>budget <sup>b</sup><br>(US\$ million) | Direct medical costs<br>averted<br>(US\$ million) | Net cost <sup>c</sup><br>(US\$ million) |
|------------------------|-------------------------------------------------|--------------------------------------------------------------|---------------------------------------------------|-----------------------------------------|
| <b>Undiscounted</b>    |                                                 |                                                              |                                                   |                                         |
| 2024                   | 195.58 (195.32, 195.74)                         | 47 269 (47 206, 47 307)                                      | 18.5 (13.6, 26.8)                                 | 47 250 (47 181, 47 292)                 |
| 2025                   | 19.95 (19.93, 19.96)                            | 4821 (4817, 4824)                                            | 89.1 (65.9, 129)                                  | 4732 (4688, 4756)                       |
| 2026                   | 19.60 (19.58, 19.61)                            | 4737 (4732, 4739)                                            | 155 (115, 223)                                    | 4582 (4509, 4623)                       |
| 2027                   | 18.63 (18.61, 18.64)                            | 4502 (4498, 4504)                                            | 217 (162, 312)                                    | 4286 (4186, 4341)                       |
| 2028                   | 21.54 (21.52, 21.55)                            | 5206 (5201, 5208)                                            | 274 (207, 395)                                    | 4932 (4806, 5001)                       |
| 2029                   | 21.30 (21.28, 21.31)                            | 5148 (5143, 5150)                                            | 327 (248, 473)                                    | 4821 (4670, 4902)                       |
| 2030                   | 21.97 (21.95, 21.98)                            | 5309 (5304, 5311)                                            | 378 (286, 548)                                    | 4930 (4756, 5024)                       |
| 2031                   | 20.99 (20.97, 20.99)                            | 5072 (5067, 5074)                                            | 425 (322, 617)                                    | 4646 (4449, 4751)                       |
| 2032                   | 20.37 (20.35, 20.38)                            | 4923 (4919, 4925)                                            | 469 (355, 682)                                    | 4453 (4237, 4570)                       |
| 2033                   | 19.91 (19.90, 19.92)                            | 4813 (4808, 4814)                                            | 510 (385, 741)                                    | 4301 (4067, 4429)                       |
| 2034                   | 18.71 (18.70, 18.72)                            | 4523 (4519, 4524)                                            | 547 (412, 795)                                    | 3975 (3724, 4112)                       |
| 2035                   | 16.94 (16.93, 16.95)                            | 4094 (4090, 4095)                                            | 580 (435, 845)                                    | 3513 (3246, 3660)                       |
| 2036                   | 16.29 (16.28, 16.30)                            | 3938 (3934, 3939)                                            | 608 (455, 889)                                    | 3329 (3046, 3483)                       |
| 2037                   | 15.19 (15.17, 15.19)                            | 3670 (3667, 3672)                                            | 635 (472, 928)                                    | 3034 (2740, 3199)                       |
| 2038                   | 15.25 (15.23, 15.25)                            | 3684 (3681, 3686)                                            | 658 (486, 961)                                    | 3025 (2721, 3199)                       |
| 2039                   | 16.13 (16.12, 16.14)                            | 3898 (3895, 3900)                                            | 676 (497, 989)                                    | 3221 (2907, 3401)                       |
| 2040                   | 16.75 (16.74, 16.76)                            | 4048 (4045, 4050)                                            | 690 (506, 1012)                                   | 3357 (3034, 3543)                       |
| 2041                   | 17.52 (17.50, 17.52)                            | 4234 (4230, 4235)                                            | 701 (512, 1030)                                   | 3533 (3201, 3722)                       |
| 2042                   | 18.97 (18.95, 18.97)                            | 4584 (4581, 4586)                                            | 706 (515, 1043)                                   | 3877 (3539, 4070)                       |
| 2043                   | 16.91 (16.90, 16.92)                            | 4088 (4085, 4089)                                            | 709 (516, 1052)                                   | 3379 (3034, 3572)                       |
| 2044                   | 17.83 (17.82, 17.84)                            | 4309 (4306, 4311)                                            | 712 (515, 1056)                                   | 3599 (3251, 3795)                       |
| 2045                   | 18.80 (18.79, 18.81)                            | 4544 (4541, 4545)                                            | 711 (513, 1058)                                   | 3833 (3484, 4032)                       |
| 2046                   | 20.32 (20.31, 20.33)                            | 4911 (4908, 4913)                                            | 709 (509, 1056)                                   | 4202 (3853, 4403)                       |
| 2047                   | 21.51 (21.50, 21.52)                            | 5199 (5196, 5200)                                            | 706 (505, 1053)                                   | 4493 (4144, 4695)                       |
| 2048                   | 20.61 (20.60, 20.62)                            | 4982 (4979, 4983)                                            | 702 (499, 1047)                                   | 4281 (3932, 4484)                       |
| 2049                   | 21.27 (21.26, 21.28)                            | 5140 (5138, 5142)                                            | 695 (492, 1040)                                   | 4446 (4099, 4649)                       |
| 2050                   | 22.11 (22.10, 22.12)                            | 5344 (5341, 5345)                                            | 688 (485, 1030)                                   | 4657 (4311, 4860)                       |
| Total                  | 690.95 (690.28, 691.28)                         | 166 988 (166 827, 167 068)                                   | 14 292 (10 509, 21 030)                           | 152 668 (145 804, 156 521)              |
| <b>Discounted (3%)</b> |                                                 |                                                              |                                                   |                                         |
| Total                  | 690.95 (690.28, 691.28)                         | 129 786 (129 651, 129 852)                                   | 9125 (6743, 13 395)                               | 120 639 (116 258, 123 078)              |

P&PI, both pre- and postinfection vaccine efficacy. Data are presented as median and 95% CI.

The government contact price of *Vaccae* was assumed to be US\$30 per dose. Coverage 90% and efficacy 54.7%.

Six doses of vaccine required per person, plus buffer stock (5%) and vaccine wastage (15%)

<sup>a</sup>Vaccinated population: 60-74 y olds in 2024, then 60-y olds from 2025 to 2050.

<sup>b</sup>Vaccination program budget = screening cost + vaccine cost + delivery and administrative cost

<sup>c</sup>Net cost (healthcare sector perspective) = vaccination program budget - direct medical costs averted



**Table S33.** Budget impact of *Vaccae* older adult routine vaccination program in China during 2024-50, with P&PI vaccine conferring 10-y protection, from societal perspective.

| Year                   | Vaccinated population <sup>a</sup><br>(million) | Vaccination program<br>budget <sup>b</sup><br>(US\$ million) | Direct and indirect<br>costs averted<br>(US\$ million) | Net cost <sup>c</sup><br>(US\$ million) |
|------------------------|-------------------------------------------------|--------------------------------------------------------------|--------------------------------------------------------|-----------------------------------------|
| <b>Undiscounted</b>    |                                                 |                                                              |                                                        |                                         |
| 2024                   | 195.58 (195.32, 195.74)                         | 47 269 (47 206, 47 307)                                      | 26.9 (19.8, 39.0)                                      | 47 241 (47 168, 47 286)                 |
| 2025                   | 19.95 (19.93, 19.96)                            | 4821 (4817, 4824)                                            | 137 (101, 197)                                         | 4685 (4620, 4720)                       |
| 2026                   | 19.60 (19.58, 19.61)                            | 4737 (4732, 4739)                                            | 253 (189, 361)                                         | 4483 (4371, 4548)                       |
| 2027                   | 18.63 (18.61, 18.64)                            | 4502 (4498, 4504)                                            | 372 (281, 535)                                         | 4130 (3961, 4222)                       |
| 2028                   | 21.54 (21.52, 21.55)                            | 5206 (5201, 5208)                                            | 486 (371, 713)                                         | 4720 (4486, 4837)                       |
| 2029                   | 21.30 (21.28, 21.31)                            | 5148 (5143, 5150)                                            | 595 (457, 885)                                         | 4554 (4259, 4691)                       |
| 2030                   | 21.97 (21.95, 21.98)                            | 5309 (5304, 5311)                                            | 705 (539, 1039)                                        | 4603 (4265, 4770)                       |
| 2031                   | 20.99 (20.97, 20.99)                            | 5072 (5067, 5074)                                            | 808 (614, 1184)                                        | 4262 (3884, 4459)                       |
| 2032                   | 20.37 (20.35, 20.38)                            | 4923 (4919, 4925)                                            | 896 (681, 1318)                                        | 4026 (3601, 4243)                       |
| 2033                   | 19.91 (19.90, 19.92)                            | 4813 (4808, 4814)                                            | 976 (742, 1440)                                        | 3836 (3369, 4071)                       |
| 2034                   | 18.71 (18.70, 18.72)                            | 4523 (4519, 4524)                                            | 1,028 (778, 1513)                                      | 3495 (3006, 3745)                       |
| 2035                   | 16.94 (16.92, 16.95)                            | 4094 (4090, 4095)                                            | 991 (761, 1477)                                        | 3104 (2614, 3334)                       |
| 2036                   | 16.29 (16.28, 16.30)                            | 3938 (3934, 3939)                                            | 951 (740, 1439)                                        | 2987 (2496, 3199)                       |
| 2037                   | 15.19 (15.17, 15.19)                            | 3670 (3667, 3672)                                            | 919 (712, 1401)                                        | 2752 (2267, 2959)                       |
| 2038                   | 15.25 (15.23, 15.25)                            | 3684 (3681, 3686)                                            | 895 (686, 1364)                                        | 2790 (2318, 2999)                       |
| 2039                   | 16.13 (16.12, 16.14)                            | 3898 (3895, 3900)                                            | 873 (660, 1325)                                        | 3026 (2571, 3239)                       |
| 2040                   | 16.75 (16.74, 16.76)                            | 4048 (4045, 4050)                                            | 853 (635, 1287)                                        | 3197 (2759, 3414)                       |
| 2041                   | 17.52 (17.50, 17.52)                            | 4234 (4230, 4235)                                            | 824 (609, 1250)                                        | 3410 (2982, 3625)                       |
| 2042                   | 18.97 (18.95, 18.97)                            | 4584 (4581, 4585)                                            | 791 (584, 1213)                                        | 3793 (3370, 4001)                       |
| 2043                   | 16.91 (16.90, 16.92)                            | 4088 (4085, 4089)                                            | 765 (559, 1177)                                        | 3324 (2910, 3530)                       |
| 2044                   | 17.83 (17.82, 17.84)                            | 4309 (4306, 4311)                                            | 734 (535, 1141)                                        | 3576 (3168, 3776)                       |
| 2045                   | 18.80 (18.79, 18.81)                            | 4544 (4541, 4545)                                            | 707 (511, 1110)                                        | 3838 (3433, 4034)                       |
| 2046                   | 20.32 (20.31, 20.33)                            | 4911 (4908, 4913)                                            | 684 (489, 1084)                                        | 4228 (3826, 4423)                       |
| 2047                   | 21.51 (21.50, 21.52)                            | 5199 (5196, 5200)                                            | 661 (469, 1053)                                        | 4539 (4145, 4731)                       |
| 2048                   | 20.61 (20.60, 20.62)                            | 4982 (4979, 4983)                                            | 640 (451, 1026)                                        | 4342 (3955, 4531)                       |
| 2049                   | 21.27 (21.26, 21.28)                            | 5140 (5138, 5142)                                            | 621 (435, 1001)                                        | 4519 (4139, 4706)                       |
| 2050                   | 22.11 (22.10, 22.12)                            | 5344 (5341, 5345)                                            | 602 (421, 977)                                         | 4742 (4365, 4924)                       |
| Total                  | 690.94 (690.28, 691.28)                         | 166 987 (166 827, 167 068)                                   | 18 408 (14 249, 28 461)                                | 148 614 (138 380, 152 819)              |
| <b>Discounted (3%)</b> |                                                 |                                                              |                                                        |                                         |
| Total                  | 690.94 (690.28, 691.28)                         | 129 785 (129 650, 129 852)                                   | 12 389 (9656, 19 031)                                  | 117 395 (110 628, 120 194)              |

P&PI, both pre- and postinfection vaccine efficacy. Data are presented as median and 95% CI.

The government contact price of *Vaccae* was assumed to be US\$30 per dose. Coverage 90% and efficacy 54.7%.

Six doses of vaccine required per person, plus buffer stock (5%) and vaccine wastage (15%)

<sup>a</sup>Vaccinated population: 60-74 y olds in 2024, then 60-y olds from 2025 to 2050.

<sup>b</sup>Vaccination program budget = screening cost + vaccine cost + delivery and administrative cost

<sup>c</sup>Net cost (societal perspective) = vaccination program budget - direct and indirect costs averted

**Table S34.** Budget impact of *Vaccae* older adult routine vaccination program in China during 2024-50, with P&PI vaccine conferring 20-y protection, from societal perspective.

| Year                   | Vaccinated population <sup>a</sup><br>(million) | Vaccination program<br>budget <sup>b</sup><br>(US\$ million) | Direct and indirect<br>costs averted<br>(US\$ million) | Net cost <sup>c</sup><br>(US\$ million) |
|------------------------|-------------------------------------------------|--------------------------------------------------------------|--------------------------------------------------------|-----------------------------------------|
| <b>Undiscounted</b>    |                                                 |                                                              |                                                        |                                         |
| 2024                   | 195.58 (195.32, 195.74)                         | 47 269 (47 206, 47 307)                                      | 26.9 (19.8, 39.0)                                      | 47 241 (47 168, 47 286)                 |
| 2025                   | 19.95 (19.93, 19.96)                            | 4821 (4817, 4824)                                            | 137 (101, 197)                                         | 4685 (4620, 4720)                       |
| 2026                   | 19.60 (19.58, 19.61)                            | 4737 (4732, 4739)                                            | 253 (189, 361)                                         | 4483 (4371, 4548)                       |
| 2027                   | 18.63 (18.61, 18.64)                            | 4502 (4498, 4504)                                            | 372 (281, 535)                                         | 4130 (3961, 4222)                       |
| 2028                   | 21.54 (21.52, 21.55)                            | 5206 (5201, 5208)                                            | 486 (371, 713)                                         | 4720 (4486, 4837)                       |
| 2029                   | 21.30 (21.28, 21.31)                            | 5148 (5143, 5150)                                            | 595 (457, 885)                                         | 4554 (4259, 4691)                       |
| 2030                   | 21.97 (21.95, 21.98)                            | 5309 (5304, 5311)                                            | 705 (539, 1039)                                        | 4603 (4265, 4770)                       |
| 2031                   | 20.99 (20.97, 20.99)                            | 5072 (5067, 5074)                                            | 808 (614, 1184)                                        | 4262 (3884, 4459)                       |
| 2032                   | 20.37 (20.35, 20.38)                            | 4923 (4919, 4925)                                            | 896 (681, 1318)                                        | 4026 (3601, 4243)                       |
| 2033                   | 19.91 (19.90, 19.92)                            | 4813 (4808, 4814)                                            | 976 (742, 1440)                                        | 3836 (3369, 4071)                       |
| 2034                   | 18.71 (18.70, 18.72)                            | 4523 (4519, 4524)                                            | 1052 (795, 1549)                                       | 3470 (2970, 3728)                       |
| 2035                   | 16.94 (16.93, 16.95)                            | 4094 (4090, 4095)                                            | 1120 (842, 1648)                                       | 2974 (2443, 3253)                       |
| 2036                   | 16.29 (16.28, 16.30)                            | 3938 (3934, 3939)                                            | 1176 (881, 1734)                                       | 2762 (2201, 3057)                       |
| 2037                   | 15.19 (15.17, 15.19)                            | 3670 (3667, 3672)                                            | 1223 (915, 1808)                                       | 2447 (1859, 2756)                       |
| 2038                   | 15.25 (15.23, 15.25)                            | 3684 (3681, 3686)                                            | 1263 (942, 1872)                                       | 2422 (1810, 2743)                       |
| 2039                   | 16.13 (16.12, 16.14)                            | 3898 (3895, 3900)                                            | 1293 (963, 1924)                                       | 2606 (1971, 2936)                       |
| 2040                   | 16.75 (16.74, 16.76)                            | 4048 (4045, 4050)                                            | 1317 (978, 1967)                                       | 2732 (2079, 3071)                       |
| 2041                   | 17.52 (17.50, 17.52)                            | 4234 (4230, 4235)                                            | 1333 (988, 1999)                                       | 2901 (2232, 3246)                       |
| 2042                   | 18.97 (18.95, 18.97)                            | 4584 (4581, 4586)                                            | 1343 (993, 2022)                                       | 3241 (2560, 3592)                       |
| 2043                   | 16.91 (16.90, 16.92)                            | 4088 (4085, 4089)                                            | 1348 (995, 2037)                                       | 2740 (2049, 3094)                       |
| 2044                   | 17.83 (17.82, 17.84)                            | 4309 (4306, 4311)                                            | 1334 (983, 2025)                                       | 2975 (2282, 3327)                       |
| 2045                   | 18.80 (18.79, 18.81)                            | 4544 (4541, 4545)                                            | 1275 (946, 1957)                                       | 3269 (2585, 3599)                       |
| 2046                   | 20.32 (20.31, 20.33)                            | 4911 (4908, 4913)                                            | 1234 (910, 1894)                                       | 3679 (3015, 4002)                       |
| 2047                   | 21.51 (21.50, 21.52)                            | 5199 (5196, 5200)                                            | 1195 (877, 1836)                                       | 4005 (3361, 4323)                       |
| 2048                   | 20.61 (20.60, 20.62)                            | 4982 (4979, 4983)                                            | 1157 (846, 1783)                                       | 3825 (3197, 4137)                       |
| 2049                   | 21.27 (21.26, 21.28)                            | 5140 (5138, 5142)                                            | 1124 (815, 1731)                                       | 4017 (3407, 4327)                       |
| 2050                   | 22.11 (22.10, 22.12)                            | 5344 (5341, 5345)                                            | 1090 (785, 1681)                                       | 4254 (3661, 4560)                       |
| Total                  | 690.95 (690.28, 691.28)                         | 166 988 (166 827, 167 068)                                   | 26 207 (19 483, 39 239)                                | 140 798 (127 605, 147 552)              |
| <b>Discounted (3%)</b> |                                                 |                                                              |                                                        |                                         |
| Total                  | 690.95 (690.28, 691.28)                         | 129 786 (129 651, 129 852)                                   | 16 856 (12 546, 25 114)                                | 112 940 (104 547, 117 279)              |

P&PI, both pre- and postinfection vaccine efficacy. Data are presented as median and 95% CI.

The government contact price of *Vaccae* was assumed to be US\$30 per dose. Coverage 90% and efficacy 54.7%.

Six doses of vaccine required per person, plus buffer stock (5%) and vaccine wastage (15%)

<sup>a</sup>Vaccinated population: 60-74 y olds in 2024, then 60-y olds from 2025 to 2050.

<sup>b</sup>Vaccination program budget = screening cost + vaccine cost + delivery and administrative cost

<sup>c</sup>Net cost (societal perspective) = vaccination program budget - direct and indirect costs averted

**Table S35.** Budget impact of *Vaccae* older adult routine vaccination program in China during 2024-50, with P&PI vaccine conferring lifelong protection, from societal perspective.

| Year                   | Vaccinated population <sup>a</sup><br>(million) | Vaccination program<br>budget <sup>b</sup><br>(US\$ million) | Direct and indirect<br>costs averted<br>(US\$ million) | Net cost <sup>c</sup><br>(US\$ million) |
|------------------------|-------------------------------------------------|--------------------------------------------------------------|--------------------------------------------------------|-----------------------------------------|
| <b>Undiscounted</b>    |                                                 |                                                              |                                                        |                                         |
| 2024                   | 195.58 (195.32, 195.74)                         | 47 269 (47 206, 47 307)                                      | 26.9 (19.8, 39.0)                                      | 47 241 (47 168, 47 286)                 |
| 2025                   | 19.95 (19.93, 19.96)                            | 4821 (4817, 4824)                                            | 137 (101, 197)                                         | 4685 (4620, 4720)                       |
| 2026                   | 19.60 (19.58, 19.61)                            | 4737 (4732, 4739)                                            | 253 (189, 361)                                         | 4483 (4371, 4548)                       |
| 2027                   | 18.63 (18.61, 18.64)                            | 4502 (4498, 4504)                                            | 372 (281, 535)                                         | 4130 (3961, 4222)                       |
| 2028                   | 21.54 (21.52, 21.55)                            | 5206 (5201, 5208)                                            | 486 (371, 713)                                         | 4720 (4486, 4837)                       |
| 2029                   | 21.30 (21.28, 21.31)                            | 5148 (5143, 5150)                                            | 595 (457, 885)                                         | 4554 (4259, 4691)                       |
| 2030                   | 21.97 (21.95, 21.98)                            | 5309 (5304, 5311)                                            | 705 (539, 1039)                                        | 4603 (4265, 4770)                       |
| 2031                   | 20.99 (20.97, 20.99)                            | 5072 (5067, 5074)                                            | 808 (614, 1184)                                        | 4262 (3884, 4459)                       |
| 2032                   | 20.37 (20.35, 20.38)                            | 4923 (4919, 4925)                                            | 896 (681, 1318)                                        | 4026 (3601, 4243)                       |
| 2033                   | 19.91 (19.90, 19.92)                            | 4813 (4808, 4814)                                            | 976 (742, 1440)                                        | 3836 (3369, 4071)                       |
| 2034                   | 18.71 (18.70, 18.72)                            | 4523 (4519, 4524)                                            | 1052 (795, 1549)                                       | 3470 (2970, 3728)                       |
| 2035                   | 16.94 (16.93, 16.95)                            | 4094 (4090, 4095)                                            | 1120 (842, 1648)                                       | 2974 (2443, 3253)                       |
| 2036                   | 16.29 (16.28, 16.30)                            | 3938 (3934, 3939)                                            | 1176 (881, 1734)                                       | 2762 (2201, 3057)                       |
| 2037                   | 15.19 (15.17, 15.19)                            | 3670 (3667, 3672)                                            | 1223 (915, 1808)                                       | 2447 (1859, 2756)                       |
| 2038                   | 15.25 (15.23, 15.25)                            | 3684 (3681, 3686)                                            | 1263 (942, 1872)                                       | 2422 (1810, 2743)                       |
| 2039                   | 16.13 (16.12, 16.14)                            | 3898 (3895, 3900)                                            | 1293 (963, 1924)                                       | 2606 (1971, 2936)                       |
| 2040                   | 16.75 (16.74, 16.76)                            | 4048 (4045, 4050)                                            | 1317 (978, 1967)                                       | 2732 (2079, 3071)                       |
| 2041                   | 17.52 (17.50, 17.52)                            | 4234 (4230, 4235)                                            | 1333 (988, 1999)                                       | 2901 (2232, 3246)                       |
| 2042                   | 18.97 (18.95, 18.97)                            | 4584 (4581, 4586)                                            | 1343 (993, 2022)                                       | 3241 (2560, 3592)                       |
| 2043                   | 16.91 (16.90, 16.92)                            | 4088 (4085, 4089)                                            | 1348 (995, 2037)                                       | 2740 (2049, 3094)                       |
| 2044                   | 17.83 (17.82, 17.84)                            | 4309 (4306, 4311)                                            | 1348 (992, 2044)                                       | 2962 (2263, 3318)                       |
| 2045                   | 18.80 (18.79, 18.81)                            | 4544 (4541, 4545)                                            | 1343 (986, 2044)                                       | 3201 (2498, 3559)                       |
| 2046                   | 20.32 (20.31, 20.33)                            | 4911 (4908, 4913)                                            | 1331 (977, 2038)                                       | 3580 (2871, 3935)                       |
| 2047                   | 21.51 (21.50, 21.52)                            | 5199 (5196, 5200)                                            | 1317 (965, 2026)                                       | 3882 (3171, 4235)                       |
| 2048                   | 20.61 (20.60, 20.62)                            | 4982 (4979, 4983)                                            | 1302 (952, 2011)                                       | 3680 (2969, 4031)                       |
| 2049                   | 21.27 (21.26, 21.28)                            | 5140 (5138, 5142)                                            | 1287 (936, 1992)                                       | 3855 (3147, 4205)                       |
| 2050                   | 22.11 (22.10, 22.12)                            | 5344 (5341, 5345)                                            | 1269 (919, 1969)                                       | 4076 (3373, 4425)                       |
| Total                  | 690.95 (690.28, 691.28)                         | 166 988 (166 827, 167 068)                                   | 27 067 (20 045, 40 455)                                | 139 932 (126 390, 146 990)              |
| <b>Discounted (3%)</b> |                                                 |                                                              |                                                        |                                         |
| Total                  | 690.95 (690.28, 691.28)                         | 129 786 (129 651, 129 852)                                   | 17 286 (12 820, 25 712)                                | 112 513 (103 948, 117 002)              |

P&PI, both pre- and postinfection vaccine efficacy. Data are presented as median and 95% CI.

The government contact price of *Vaccae* was assumed to be US\$30 per dose. Coverage 90% and efficacy 54.7%.

Six doses of vaccine required per person, plus buffer stock (5%) and vaccine wastage (15%)

<sup>a</sup>Vaccinated population: 60-74 y olds in 2024, then 60-y olds from 2025 to 2050.

<sup>b</sup>Vaccination program budget = screening cost + vaccine cost + delivery and administrative cost

<sup>c</sup>Net cost (societal perspective) = vaccination program budget - direct and indirect costs averted

**Table S36.** Budget impact of *Vaccae* all-age vaccination program in China during 2024-50, from healthcare sector perspective.

| Year                                         | Vaccinated population<br>(thousand) | Doses of vaccine required <sup>a</sup><br>(thousand) | Vaccine cost <sup>b</sup><br>(US\$ million) | Vaccination program<br>budget <sup>c</sup><br>(US\$ million) | Direct medical cost<br>averted<br>(US\$ million) | Net cost <sup>d</sup><br>(US\$ million) |
|----------------------------------------------|-------------------------------------|------------------------------------------------------|---------------------------------------------|--------------------------------------------------------------|--------------------------------------------------|-----------------------------------------|
| <b>PSI vaccine type</b>                      |                                     |                                                      |                                             |                                                              |                                                  |                                         |
| <b>Protection duration 10-y scenario</b>     |                                     |                                                      |                                             |                                                              |                                                  |                                         |
| <b>Undiscounted</b>                          |                                     |                                                      |                                             |                                                              |                                                  |                                         |
| 2024                                         | 114.769 (86.215, 236.614)           | 826.334 (620.747, 1703.620)                          | 24 968 (18 756, 51 475)                     | 31 003 (24 057, 60 640)                                      | 18.7 (13.5, 27.1)                                | 30 983 (24 037, 60 624)                 |
| 2034                                         | 93.736 (68.055, 199.925)            | 674.897 (489.994, 1439.462)                          | 20 392 (14 805, 43 494)                     | 25 911 (19 664, 51 740)                                      | 489 (373, 716)                                   | 25 409 (19 083, 51 292)                 |
| 2044                                         | 64.971 (46.069, 145.737)            | 467.791 (331.698, 1049.309)                          | 14 134 (10 022, 31 705)                     | 18 623 (14 025, 38 268)                                      | 542 (408, 824)                                   | 18 097 (13 385, 37 749)                 |
| 2024-2050                                    | 274.600 (200.339, 582.277)          | 1977.117 (1442.439, 4192.392)                        | 59 739 (43 584, 126 674)                    | 75 803 (57 738, 150 640)                                     | 11 277 (8611, 16 916)                            | 63 991 (44 136, 139 957)                |
| <b>Discounted (3%)</b>                       |                                     |                                                      |                                             |                                                              |                                                  |                                         |
| 2024-2050                                    | 274.6 (200.339, 582.277)            | 1977.117 (1442.439, 4192.392)                        | 48 169 (35 322, 101 393)                    | 60 813 (46 447, 120 321)                                     | 7347 (5644, 11 000)                              | 52 908 (37 527, 113 380)                |
| <b>Protection duration 20-y scenario</b>     |                                     |                                                      |                                             |                                                              |                                                  |                                         |
| <b>Undiscounted</b>                          |                                     |                                                      |                                             |                                                              |                                                  |                                         |
| 2024                                         | 114.769 (86.215, 236.614)           | 826.334 (620.747, 1703.620)                          | 24 968 (18 756, 51 475)                     | 31 003 (24 057, 60 640)                                      | 18.7 (13.5, 27.1)                                | 30 983 (24 037, 60 624)                 |
| 2044                                         | 64.954 (46.053, 145.723)            | 467.665 (331.578, 1049.206)                          | 14 131 (10 019, 31 702)                     | 18 619 (14 021, 38 265)                                      | 586 (436, 867)                                   | 18 052 (13 314, 37 719)                 |
| 2024-2050                                    | 180.856 (132.267, 382.337)          | 1302.163 (952.325, 2752.827)                         | 39 345 (28 775, 83 177)                     | 49 892 (38 072, 98 899)                                      | 11 924 (9059, 17 631)                            | 37 975 (23 631, 87 820)                 |
| <b>Discounted (3%)</b>                       |                                     |                                                      |                                             |                                                              |                                                  |                                         |
| 2024-2050                                    | 180.856 (132.267, 382.337)          | 1302.163 (952.325, 2752.827)                         | 32 984 (24 303, 69 028)                     | 41 522 (31 815, 81 821)                                      | 7784 (5924, 11 460)                              | 33 663 (22 432, 74 632)                 |
| <b>Protection duration lifelong scenario</b> |                                     |                                                      |                                             |                                                              |                                                  |                                         |
| <b>Undiscounted</b>                          |                                     |                                                      |                                             |                                                              |                                                  |                                         |
| 2024                                         | 114.769 (86.215, 236.614)           | 826.334 (620.747, 1703.620)                          | 24 968 (18 756, 51 475)                     | 31 003 (24 057, 60 640)                                      | 18.7 (13.5, 27.1)                                | 30 983 (24 037, 60 624)                 |
| 2024-2050                                    | 114.769 (86.215, 236.614)           | 826.334 (620.747, 1703.620)                          | 24 968 (18 756, 51 475)                     | 30 999 (24 053, 60 636)                                      | 12 452 (9409, 18 233)                            | 19 046 (8783, 49 212)                   |
| <b>Discounted (3%)</b>                       |                                     |                                                      |                                             |                                                              |                                                  |                                         |
| 2024-2050                                    | 114.769 (86.215, 236.614)           | 826.334 (620.747, 1703.620)                          | 24 968 (18 756, 51 475)                     | 30 999 (24 053, 60 636)                                      | 8041 (6097, 11 758)                              | 23 204 (14 279, 53 276)                 |
| <b>P&amp;PI vaccine type</b>                 |                                     |                                                      |                                             |                                                              |                                                  |                                         |
| <b>Protection duration 10-y scenario</b>     |                                     |                                                      |                                             |                                                              |                                                  |                                         |
| <b>Undiscounted</b>                          |                                     |                                                      |                                             |                                                              |                                                  |                                         |
| 2024                                         | 1002.392<br>(1001.732, 1 002.745)   | 7217.220<br>(7212.468, 7219.763)                     | 218 070<br>(217 927, 218 147)               | 243 812<br>(243 651, 243 898)                                | 33.1<br>(25.6, 48.6)                             | 243 780<br>(243 600, 243 872)           |
| 2034                                         | 1010.728<br>(1010.407, 1010.993)    | 7277.240<br>(7274.931, 7279.147)                     | 219 884<br>(219 814, 219 941)               | 245 839<br>(245 761, 245 904)                                | 767<br>(602, 1 158)                              | 245 077<br>(244 606, 245 282)           |
| 2044                                         | 916.166<br>(915.947, 916.392)       | 6596.395<br>(6594.815, 6598.026)                     | 199 312<br>(199 264, 199 361)               | 222 839<br>(222 786, 222 894)                                | 804<br>(615, 1 284)                              | 222 036<br>(221 515, 222 249)           |
| 2024-2050                                    | 2929.264<br>(2928.145, 2930.098)    | 21 090.704<br>(21 082.641, 21 096.708)               | 637 261<br>(637 018, 637 443)               | 712 485<br>(712 213, 712 688)                                | 17 335<br>(13 570, 27 166)                       | 695 150<br>(685 045, 699 134)           |
| <b>Discounted (3%)</b>                       |                                     |                                                      |                                             |                                                              |                                                  |                                         |
| 2024-2050                                    | 2929.264<br>(2928.145, 2930.098)    | 21 090.704<br>(21 082.641, 21 096.708)               | 492 035<br>(491 825, 492 180)               | 550 116<br>(549 881, 550 278)                                | 11 471<br>(8978, 17 779)                         | 538 652<br>(532 094, 541 311)           |
| <b>Protection duration 20-y scenario</b>     |                                     |                                                      |                                             |                                                              |                                                  |                                         |
| <b>Undiscounted</b>                          |                                     |                                                      |                                             |                                                              |                                                  |                                         |
| 2024                                         | 1002.392<br>(1001.732, 1002.745)    | 7217.220<br>(7212.468, 7219.763)                     | 218 070<br>(217 927, 218 147)               | 243 812<br>(243 651, 243 898)                                | 33.1<br>(25.6, 48.6)                             | 243 780<br>(243 600, 243 872)           |
| 2044                                         | 916.149<br>(915.931, 916.377)       | 6596.270<br>(6594.702, 6597.917)                     | 199 308<br>(199 261, 199 358)               | 222 835<br>(222 782, 222 890)                                | 880<br>(670, 1 372)                              | 221 962<br>(221 423, 222 200)           |
| 2024-2050                                    | 1918.519<br>(1917.691, 1919.091)    | 13 813.335<br>(13 807.375, 13 817.452)               | 417 374<br>(417 194, 417 498)               | 466 641<br>(466 440, 466 780)                                | 18 280<br>(14 269, 28 124)                       | 448 390<br>(438 320, 452 526)           |
| <b>Discounted (3%)</b>                       |                                     |                                                      |                                             |                                                              |                                                  |                                         |
| 2024-2050                                    | 1918.519<br>(1917.691, 1919.091)    | 13 813.335<br>(13 807.375, 13 817.452)               | 328 419<br>(328 256, 328 522)               | 367 186<br>(367 004, 367 302)                                | 12 005<br>(9391, 18 381)                         | 355 192<br>(348 620, 357 923)           |
| <b>Protection duration lifelong scenario</b> |                                     |                                                      |                                             |                                                              |                                                  |                                         |
| <b>Undiscounted</b>                          |                                     |                                                      |                                             |                                                              |                                                  |                                         |
| 2024                                         | 1002.392<br>(1001.732, 1002.745)    | 7217.220<br>(7212.468, 7219.763)                     | 218 070<br>(217 927, 218 147)               | 243 812<br>(243 651, 243 898)                                | 33.1<br>(25.6, 48.6)                             | 243 780<br>(243 600, 243 872)           |
| 2024-2050                                    | 1002.392<br>(1001.732, 1002.745)    | 7217.220<br>(7212.468, 7219.763)                     | 218 070<br>(217 927, 218 147)               | 243 812<br>(243 651, 243 898)                                | 19 120<br>(14 784, 29 202)                       | 224 708<br>(214 506, 229 120)           |
| <b>Discounted (3%)</b>                       |                                     |                                                      |                                             |                                                              |                                                  |                                         |
| 2024-2050                                    | 1002.392<br>(1001.732, 1002.745)    | 7217.220<br>(7212.468, 7219.763)                     | 218 070<br>(217 927, 218 147)               | 243 812<br>(243 651, 243 898)                                | 12 402<br>(9646, 18 880)                         | 231 423<br>(224 826, 234 259)           |

PSI, postinfection vaccine efficacy; P&PI, both pre- and postinfection vaccine efficacy. Data are presented as median and 95% CI.

The government contact price of *Vaccae* was assumed to be US\$30 per dose. Coverage 90% and efficacy 54.7%.

<sup>a</sup>Six doses of vaccine required per person, plus buffer stock (5%) and vaccine wastage (15%)

<sup>b</sup>Vaccine cost = vaccine price × doses of vaccine required + vaccine campaign cost (US\$1.55 per person) × vaccinated population

<sup>c</sup>Vaccination program budget = screening cost + vaccine cost + delivery and administrative cost

<sup>d</sup>Net cost (healthcare sector perspective) = vaccination program budget - direct medical costs averted

**Table S37.** Budget impact of *Vaccae* all-age vaccination program in China during 2024-50, from societal perspective.

| Year                                         | Vaccinated population (thousand) | Doses of vaccine required <sup>a</sup> (thousand) | Vaccine cost <sup>b</sup> (US\$ million) | Vaccination program budget <sup>c</sup> (US\$ million) | Direct and indirect cost averted (US\$ million) | Net cost <sup>d</sup> (US\$ million) |
|----------------------------------------------|----------------------------------|---------------------------------------------------|------------------------------------------|--------------------------------------------------------|-------------------------------------------------|--------------------------------------|
| <b>PSI vaccine type</b>                      |                                  |                                                   |                                          |                                                        |                                                 |                                      |
| <b>Protection duration 10-y scenario</b>     |                                  |                                                   |                                          |                                                        |                                                 |                                      |
| <b>Undiscounted</b>                          |                                  |                                                   |                                          |                                                        |                                                 |                                      |
| 2024                                         | 114.769 (86.215, 236.614)        | 826.334 (620.747, 1703.620)                       | 24 968 (18 756, 51 475)                  | 31 003 (24 057, 60 640)                                | 56.0 (40.3, 86.5)                               | 30 946 (23 995, 60 586)              |
| 2034                                         | 93.736 (68.055, 199.925)         | 674.897 (489.994, 1439.462)                       | 20 392 (14 805, 43 494)                  | 25 911 (19 664, 51 740)                                | 1282 (987, 1969)                                | 24 615 (18 209, 50 475)              |
| 2044                                         | 64.971 (46.069, 145.737)         | 467.791 (331.698, 1049.309)                       | 14 134 (10 022, 31 705)                  | 18 623 (14 025, 38 268)                                | 1327 (1014, 2139)                               | 17 313 (12 545, 36 887)              |
| 2024-2050                                    | 274.600 (200.339, 582.277)       | 1977.117 (1442.439, 4192.392)                     | 59 739 (43 584, 126 674)                 | 75 803 (57 738, 150 640)                               | 29 686 (22 722, 47 046)                         | 45 346 (23 383, 120 582)             |
| <b>Discounted (3%)</b>                       |                                  |                                                   |                                          |                                                        |                                                 |                                      |
| 2024-2050                                    | 274.600 (200.339, 582.277)       | 1977.117 (1442.439, 4192.392)                     | 48 169 (35 322, 101 393)                 | 60 813 (46 447, 120 321)                               | 19 595 (15 114, 31 011)                         | 40 780 (23 942, 100 566)             |
| <b>Protection duration 20-y scenario</b>     |                                  |                                                   |                                          |                                                        |                                                 |                                      |
| <b>Undiscounted</b>                          |                                  |                                                   |                                          |                                                        |                                                 |                                      |
| 2024                                         | 114.769 (86.215, 236.614)        | 826.334 (620.747, 1703.620)                       | 24 968 (18 756, 51 475)                  | 31 003 (24 057, 60 640)                                | 56.0 (40.3, 86.5)                               | 30 946 (23 995, 60 586)              |
| 2044                                         | 64.954 (46.053, 145.723)         | 467.665 (331.578, 1049.206)                       | 14 131 (10 019, 31 702)                  | 18 619 (14 021, 38 265)                                | 1326 (1011, 2043)                               | 17 319 (12 503, 36 903)              |
| 2024-2050                                    | 180.856 (132.267, 382.337)       | 1302.163 (952.325, 2752.827)                      | 39 345 (28 775, 83 177)                  | 49 892 (38 072, 98 899)                                | 29 800 (22 805, 46 217)                         | 18 808 (2 088, 68 930)               |
| <b>Discounted (3%)</b>                       |                                  |                                                   |                                          |                                                        |                                                 |                                      |
| 2024-2050                                    | 180.856 (132.267, 382.337)       | 1302.163 (952.325, 2752.827)                      | 32 984 (24 303, 69 028)                  | 41 522 (31 815, 81 821)                                | 19 637 (15 216, 30 576)                         | 21 227 (8 304, 62 093)               |
| <b>Protection duration lifelong scenario</b> |                                  |                                                   |                                          |                                                        |                                                 |                                      |
| <b>Undiscounted</b>                          |                                  |                                                   |                                          |                                                        |                                                 |                                      |
| 2024                                         | 114.769 (86.215, 236.614)        | 826.334 (620.747, 1703.620)                       | 24 968 (18 756, 51 475)                  | 31 003 (24 057, 60 640)                                | 56.0 (40.3, 86.5)                               | 30 946 (23 995, 60 586)              |
| 2024-2050                                    | 114.769 (86.215, 236.614)        | 826.334 (620.747, 1703.620)                       | 24 968 (18 756, 51 475)                  | 30 999 (24 053, 60 636)                                | 30 196 (23 085, 46 337)                         | 374 (-14 011, 30 059)                |
| <b>Discounted (3%)</b>                       |                                  |                                                   |                                          |                                                        |                                                 |                                      |
| 2024-2050                                    | 114.769 (86.215, 236.614)        | 826.334 (620.747, 1703.620)                       | 24 968 (18 756, 51 475)                  | 30 999 (24 053, 60 636)                                | 19 814 (15 355, 30 638)                         | 10 403 (-189, 40 783)                |
| <b>P&amp;PI vaccine type</b>                 |                                  |                                                   |                                          |                                                        |                                                 |                                      |
| <b>Protection duration 10-y scenario</b>     |                                  |                                                   |                                          |                                                        |                                                 |                                      |
| <b>Undiscounted</b>                          |                                  |                                                   |                                          |                                                        |                                                 |                                      |
| 2024                                         | 1002.392 (1001.732, 1002.745)    | 7217.220 (7212.468, 7219.763)                     | 218 070 (217 927, 218 147)               | 243 812 (243 651, 243 898)                             | 124 (96.0, 202)                                 | 243 692 (243 449, 243 801)           |
| 2034                                         | 1010.728 (1010.407, 1010.993)    | 7277.240 (7274.931, 7279.147)                     | 219 884 (219 814, 219 941)               | 245 839 (245 761, 245 904)                             | 2477 (1893, 3854)                               | 243 359 (241 921, 243 979)           |
| 2044                                         | 916.166 (915.947, 916.392)       | 6596.395 (6594.815, 6598.026)                     | 199 312 (199 264, 199 361)               | 222 839 (222 786, 222 894)                             | 2367 (1708, 3822)                               | 220 470 (218 977, 221 133)           |
| 2024-2050                                    | 2929.264 (2928.145, 2930.098)    | 21 090.704 (21 082.641, 21 096.708)               | 637 261 (637 018, 637 443)               | 712 485 (712 213, 712 688)                             | 55 621 (41 528, 88 313)                         | 656 787 (623 920, 671 063)           |
| <b>Discounted (3%)</b>                       |                                  |                                                   |                                          |                                                        |                                                 |                                      |
| 2024-2050                                    | 2929.264 (2928.145, 2930.098)    | 21 090.704 (21 082.641, 21 096.708)               | 492 035 (491 825, 492 180)               | 550 116 (549 881, 550 278)                             | 37 341 (28 016, 59 001)                         | 512 655 (490 891, 522 187)           |
| <b>Protection duration 20-y scenario</b>     |                                  |                                                   |                                          |                                                        |                                                 |                                      |
| <b>Undiscounted</b>                          |                                  |                                                   |                                          |                                                        |                                                 |                                      |
| 2024                                         | 1002.392 (1001.732, 1002.745)    | 7217.220 (7212.468, 7219.763)                     | 218 070 (217 927, 218 147)               | 243 812 (243 651, 243 898)                             | 124 (96.0, 202)                                 | 243 692 (243 449, 243 801)           |
| 2044                                         | 916.149 (915.931, 916.377)       | 6596.270 (6594.702, 6597.917)                     | 199 308 (199 261, 199 358)               | 222 835 (222 782, 222 890)                             | 2351 (1742, 3687)                               | 220 491 (219 101, 221 111)           |
| 2024-2050                                    | 1918.519 (1917.691, 1919.091)    | 13 813.335 (13 807.375, 13 817.452)               | 417 374 (417 194, 417 498)               | 466 641 (466 440, 466 780)                             | 55 626 (42 067, 86 942)                         | 410 920 (379 510, 424 651)           |
| <b>Discounted (3%)</b>                       |                                  |                                                   |                                          |                                                        |                                                 |                                      |
| 2024-2050                                    | 1918.519 (1917.691, 1919.091)    | 13 813.335 (13 807.375, 13 817.452)               | 328 419 (328 256, 328 522)               | 367 186 (367 004, 367 302)                             | 37 576 (28 370, 58 245)                         | 329 527 (308 761, 338 883)           |
| <b>Protection duration lifelong scenario</b> |                                  |                                                   |                                          |                                                        |                                                 |                                      |
| <b>Undiscounted</b>                          |                                  |                                                   |                                          |                                                        |                                                 |                                      |
| 2024                                         | 1002.392 (1001.732, 1002.745)    | 7217.220 (7212.468, 7219.763)                     | 218 070 (217 927, 218 147)               | 243 812 (243 651, 243 898)                             | 124 (96.0, 202)                                 | 243 692 (243 449, 243 801)           |
| 2024-2050                                    | 1002.392 (1001.732, 1002.745)    | 7217.220 (7212.468, 7219.763)                     | 218 070 (217 927, 218 147)               | 243 812 (243 651, 243 898)                             | 56 356 (42 785, 87 108)                         | 187 438 (156 532, 201 079)           |
| <b>Discounted (3%)</b>                       |                                  |                                                   |                                          |                                                        |                                                 |                                      |
| 2024-2050                                    | 1002.392 (1001.732, 1002.745)    | 7217.220 (7212.468, 7219.763)                     | 218 070 (217 927, 218 147)               | 243 812 (243 651, 243 898)                             | 37 868 (28 727, 58 329)                         | 205 908 (185 311, 215 138)           |

PSI, postinfection vaccine efficacy; P&PI, both pre- and postinfection vaccine efficacy. Data are presented as median and 95% CI.

The government contact price of *Vaccae* was assumed to be US\$30 per dose. Coverage 90% and efficacy 54.7%.

<sup>a</sup>Six doses of vaccine required per person, plus buffer stock (5%) and vaccine wastage (15%)

<sup>b</sup>Vaccine cost = vaccine price × doses of vaccine required + vaccine campaign cost (US\$1.55 per person) × vaccinated population

<sup>c</sup>Vaccination program budget = screening cost + vaccine cost + delivery and administrative cost

<sup>d</sup>Net cost (societal perspective) = vaccination program budget - direct and indirect costs averted

## 7. Extended references

- 1 Zhifei Shengwu (ZFSW) Biological Products Co. L. Package Insert of Mycobacterium Vaccae for Injection, 2021. Available: <http://www.zhifeishengwu.com/d/file/product/ybcp/2021-07-16/aaa5883dde4e566ef7328dbe8c7c29da.pdf>. [Accessed 11 Nov 2022].
- 2 United Nations Department of Economic and Social Affairs PD. World Population Prospects 2022, Online Edition. Available: <https://population.un.org/wpp/Download/Standard/CSV/> [Accessed 11 Nov 2022].
- 3 Harris RC, Sumner T, Knight GM, *et al.* Age-targeted tuberculosis vaccination in China and implications for vaccine development: a modelling study. *Lancet Glob Health* 2019;7:e209-e18. doi: 10.1016/S2214-109X(18)30452-2.
- 4 Read JM, Lessler J, Riley S, *et al.* Social mixing patterns in rural and urban areas of southern China. *Proc Biol Sci* 2014;281:20140268. doi: 10.1098/rspb.2014.0268.
- 5 Leung K, Jit M, Lau EHY, *et al.* Social contact patterns relevant to the spread of respiratory infectious diseases in Hong Kong. *Sci Rep* 2017;7:7974. doi: 10.1038/s41598-017-08241-1.
- 6 Zhang J, Klepac P, Read JM, *et al.* Patterns of human social contact and contact with animals in Shanghai, China. *Sci Rep* 2019;9:15141. doi: 10.1038/s41598-019-51609-8.
- 7 Prem K, Zandvoort KV, Klepac P, *et al.* Projecting contact matrices in 177 geographical regions: An update and comparison with empirical data for the COVID-19 era. *PLoS Comput Biol* 2021;17:e1009098. doi: 10.1371/journal.pcbi.1009098.
- 8 Dye C, Williams BG. Eliminating human tuberculosis in the twenty-first century. *J R Soc Interface* 2008;5:653-62. doi: 10.1098/rsif.2007.1138.
- 9 Abu-Raddad LJ, Sabatelli L, Achterberg JT, *et al.* Epidemiological benefits of more-effective tuberculosis vaccines, drugs, and diagnostics. *Proc Natl Acad Sci U S A* 2009;106:13980-5. doi: 10.1073/pnas.0901720106.
- 10 Knight GM, Griffiths UK, Sumner T, *et al.* Impact and cost-effectiveness of new tuberculosis vaccines in low- and middle-income countries. *Proc Natl Acad Sci U S A* 2014;111:15520-5. doi: 10.1073/pnas.1404386111.
- 11 Ferebee SH. Controlled chemoprophylaxis trials in tuberculosis. A general review. *Bibl Tuberc* 1970;26:28-106.
- 12 Comstock GW. Epidemiology of tuberculosis. *Am Rev Respir Dis* 1982;125:8-15. doi: 10.1164/arrd.1982.125.3P2.8.
- 13 Vynnycky E, Fine PE. An investigation of the transmission dynamics of M. tuberculosis. 1996.
- 14 Vynnycky E, Fine PE. The natural history of tuberculosis: the implications of age-dependent risks of disease and the role of reinfection. *Epidemiol Infect* 1997;119:183-201. doi: 10.1017/s0950268897007917.
- 15 Dye C, Garnett GP, Sleeman K, *et al.* Prospects for worldwide tuberculosis control under the WHO DOTS strategy. Directly observed short-course therapy. *Lancet* 1998;352:1886-91. doi: 10.1016/s0140-6736(98)03199-7.
- 16 Sutherland I, Svandova E, Radhakrishna S. The development of clinical tuberculosis following infection with tubercle bacilli. 1. A theoretical model for the development of clinical tuberculosis following infection, linking from data on the risk of tuberculous infection and the incidence of

- clinical tuberculosis in the Netherlands. *Tubercle* 1982;63:255-68. doi: 10.1016/s0041-3879(82)80013-5.
- 17 Gabriela MGM, Rodrigues P, Hilker FM, *et al.* Implications of partial immunity on the prospects for tuberculosis control by post-exposure interventions. *J Theor Biol* 2007;248:608-17. doi: 10.1016/j.jtbi.2007.06.005.
- 18 Schulzer M, Fitzgerald JM, Enarson DA, *et al.* An estimate of the future size of the tuberculosis problem in sub-Saharan Africa resulting from HIV infection. *Tuber Lung Dis* 1992;73:52-8. doi: 10.1016/0962-8479(92)90080-4.
- 19 Schaaf HS, Collins A, Bekker A, *et al.* Tuberculosis at extremes of age. *Respirology* 2010;15:747-63. doi: 10.1111/j.1440-1843.2010.01784.x.
- 20 Shea KM, Kammerer JS, Winston CA, *et al.* Estimated rate of reactivation of latent tuberculosis infection in the United States, overall and by population subgroup. *Am J Epidemiol* 2014;179:216-25. doi: 10.1093/aje/kwt246.
- 21 Yoshikawa TT. Tuberculosis in aging adults. *J Am Geriatr Soc* 1992;40:178-87. doi: 10.1111/j.1532-5415.1992.tb01941.x.
- 22 Rajagopalan S, Yoshikawa TT. Tuberculosis in the elderly. *Z Gerontol Geriatr* 2000;33:374-80. doi: 10.1007/s003910070034.
- 23 Marion CR, High KP. *Tuberculosis in Older Adults: Infectious Disease in the Aging*, 2009.
- 24 Tiemersma EW, van der Werf MJ, Borgdorff MW, *et al.* Natural history of tuberculosis: duration and fatality of untreated pulmonary tuberculosis in HIV negative patients: a systematic review. *PLoS One* 2011;6:e17601. doi: 10.1371/journal.pone.0017601.
- 25 Gomes MG, Franco AO, Gomes MC, *et al.* The reinfection threshold promotes variability in tuberculosis epidemiology and vaccine efficacy. *Proc Biol Sci* 2004;271:617-23. doi: 10.1098/rspb.2003.2606.
- 26 World Health Organization. WHO Tuberculosis data, 2022. Available: <https://www.who.int/teams/global-tuberculosis-programme/data> [Accessed 11 Nov 2022].
- 27 Krutikov M, Faust L, Nikolayevskyy V, *et al.* The diagnostic performance of novel skin-based in-vivo tests for tuberculosis infection compared with purified protein derivative tuberculin skin tests and blood-based in vitro interferon-gamma release assays: a systematic review and meta-analysis. *Lancet Infect Dis* 2022;22:250-64. doi: 10.1016/S1473-3099(21)00261-9.
- 28 Harris RC, Sumner T, Knight GM, *et al.* Potential impact of tuberculosis vaccines in China, South Africa, and India. *Sci Transl Med* 2020;12:eaax4607. doi: 10.1126/scitranslmed.aax4607.
- 29 Varadhan R, W. Borchers H, Bechard V. *dfoptim: Derivative-Free Optimization*, 2020. Available: <https://cran.r-project.org/web/packages/dfoptim/index.html> [Accessed 11 Nov 2022].
- 30 Zang X, Krebs E, Min JE, *et al.* Development and Calibration of a Dynamic HIV Transmission Model for 6 US Cities. *Med Decis Making* 2020;40:3-16. doi: 10.1177/0272989X19889356.
- 31 United Nations Department of Economic and Social Affairs PD. *World Population Prospects 2022: Summary of Results*. UN DESA/POP/2022/TR/NO. 3, 2022.
- 32 Wang L, Zhang H, Ruan Y, *et al.* Tuberculosis prevalence in China, 1990-2010; a longitudinal analysis of national survey data. *Lancet* 2014;383:2057-64. doi: 10.1016/S0140-6736(13)62639-2.
- 33 Chinese Center for Disease Control and Prevention. The Data-center of China Public Health Science. Available: <https://www.phsciencedata.cn/Share/en/index.jsp> [Accessed 12 Dec 2022]
- 34 Zhang H, Huang F, Chen W, *et al.* Estimates of tuberculosis mortality rates in China using the disease surveillance point system, 2004-2010. *Biomed Environ Sci* 2012;25:483-8. doi:

- 10.3967/0895-3988.2012.04.015.
- 35 Qiu S, Pan H, Zhang S, *et al.* Is tuberculosis treatment really free in China? A study comparing two areas with different management models. *PLoS One* 2015;10:e0126770. doi: 10.1371/journal.pone.0126770.
  - 36 Zhao Y, Xu S, Wang L, *et al.* National survey of drug-resistant tuberculosis in China. *N Engl J Med* 2012;366:2161-70. doi: 10.1056/NEJMoa1108789.
  - 37 Wei X, Zou G, Yin J, *et al.* Providing financial incentives to rural-to-urban tuberculosis migrants in Shanghai: an intervention study. *Infect Dis Poverty* 2012;1:9. doi: 10.1186/2049-9957-1-9.
  - 38 National Bureau of Statistics of China. China Statistical Yearbook. Beijing: China Statistics Press, 2021.
  - 39 Pan HQ, Bele S, Feng Y, *et al.* Analysis of the economic burden of diagnosis and treatment of tuberculosis patients in rural China. *Int J Tuberc Lung Dis* 2013;17:1575-80. doi: 10.5588/ijtld.13.0144.
  - 40 Henan Medical Security Bureau. Summary of medical service price items of public medical institutions managed by Henan Province, 2021. Available: <https://ylbz.henan.gov.cn/2021/12-06/2360139.html> [Accessed 12 Dec 2022].
  - 41 Zhenjiang First People's Hospital. Jiangsu province medical service item price manual, 2022. Available: <https://www.zjhospital.net/shehuigongkai/4028.html> [Accessed 12 Dec 2022].
  - 42 The Second Affiliated Hospital of Chongqing Medical University. Chongqing medical service price project, 2021. Available: <https://www.sahcqmu.com/index.php?c=show&id=12882> [Accessed 12 Dec 2022].
  - 43 Zeng Y, Luo M, Chen J, *et al.* An economic evaluation of the current measles vaccination program: A case study in Zhejiang Province, east China. *Vaccine* 2019;37:3071-77. doi: 10.1016/j.vaccine.2019.04.057.
  - 44 Weerasuriya CK, Harris RC, McQuaid CF, *et al.* The epidemiologic impact and cost-effectiveness of new tuberculosis vaccines on multidrug-resistant tuberculosis in India and China. *BMC Med* 2021;19:60. doi: 10.1186/s12916-021-01932-7.
  - 45 Hutton DW, So SK, Brandeau ML. Cost-effectiveness of nationwide hepatitis B catch-up vaccination among children and adolescents in China. *Hepatology* 2010;51:405-14. doi: 10.1002/hep.23310.
